# Supplementary material for: Examining performance and likelihood ratios for two likelihood ratio systems using the PROVEDIt dataset
Source: PLoS One. 2021 Sep 17;16(9):e0256714. doi: 10.1371/journal.pone.0256714 (PMC8448353; doi:10.1371/journal.pone.0256714)
Supplement: S2 Table — (XLSX) [file pone.0256714.s007.xlsx]

## Sheet: S2 Table 
S2 Table. Negative control profiles used in determining drop-in parameters were obtained from the PROVEDIt_GlobalFiler_29 cycles_3500_15s dataset.
EB051315ADG-GF
EB051915ADG-GF
EB061015ADG-GF
EB1052115ADG-GF
NEG012516ADG-GF
NEG012616ADG-GF
NEG020116LEA-GF
NEG020416ADG-GF
NEG021616ADG-GF
NEG021616LEA-GF
NEG022416ADG-GF
NEG022816ADG-GF
NEG1021616ADG-GF
RB021315ADG-GF
RB012115ADG-GF
RB012615LEA-GF
RB021215LEA-GF
RB022615LEA-GF
RB040815ADG-GF
RB052915LEA-GF
RB061615LEA-GF
RB063015LEA-GF
RB1020515LEA-GF
RB1021915LEA-GF
RB1022315ADG-GF
RB1032315LEA-GF
RB1040115LEA-GF
RB1073115LEA-GF
RB2063015LEA-GF
RB110915LEA-GF
RB121015LEA-GF
RB1111215LEA-GF
RB010915LEA-GF
RB011215ADG-GF
RB121514ADG-GF
RB121614ADG-GF
NEG110315ADG-GF
RB042315ADG-GF
RB050615ADG-GF
RB052015ADG-GF
RB052215ADG-GF
RB060215ADG-GF
RB061015LEA-GF
RB081415ADG-GF
RB1021315ADG-GF
NEG1011516ADG1-GF
NEG1011516ADG-GF
RB1081315LEA-GF
EB072515ADG-GF
RB102315LEA-GF
RB112315ADG-GF
RB1121015LEA-GF
NEG1012516ADG-GF
NEG1112015LMT-GF
NEG1112915LMT-GF
NEG 1120315 LMT-GF
NEG 1120515 LMT-GF
RB011315LEA-GF
RB011415ADG-GF
RB121714LEA-GF
RB043015LEA-GF
RB030615ADG-GF
RB061115ADG-GF
RB1042315ADG-GF
RB1052015ADG-GF
RB1052215ADG-GF
RB112415ADG-GF
RB051315LEA-GF
RB061815LEA-GF
NEG1011116ADG-GF
NEG1011216ADG-GF
NEG1012016ADG-GF
NEG1091215ADG-GF
NEG1093015ADG-GF
NEG1100115ADG-GF
NEG1100215ADG-GF
NEG1100615ADG-GF
NEG1100815ADG-GF
NEG1101515ADG-GF
NEG1101715ADG-GF
NEG1102315ADG-GF
NEG1102715ADG-GF
RB111015LEA-GF
RB111915ADG-GF
RB1102315LEA-GF
RB1112315ADG-GF
RB2121515LEA-GF
NEG1071715ADG-GF
NEG120215LMT-GF
NEG011316ADG-GF
RB121214LEA-GF
RB1112415ADG-GF
NEG1092315ADG-GF
RB051915LEA-GF
RB061915LEA-GF
RB1061215LEA-GF
RB1120415ADG-GF
NEG1011816ADG-GF
RB072315ADG-GF
RB110315LEA-GF
RB1121515LEA-GF
NEG1072115ADG-GF
NEG1090315ADG-GF
NEG1090915ADG-GF
EB032415ADG-GF
NEG102315ADG-GF
NEG011116ADG-GF
NEG011216ADG-GF
NEG011516ADG1-GF
NEG011816ADG-GF
NEG012016ADG-GF
NEG091015ADG-GF
NEG091215ADG-GF
NEG092315ADG-GF
NEG092415ADG-GF
NEG093015ADG-GF
NEG100115ADG-GF
NEG100215ADG-GF
NEG100615ADG-GF
NEG100815ADG-GF
NEG101515ADG-GF
NEG101715ADG-GF
NEG102715ADG-GF
NEG072115ADG-GF
NEG090315ADG-GF
NEG090915ADG-GF
NEG102115ADG-GF
NEG102215ADG-GF
NEG103015ADG-GF
NEG110315ADG-GF
NEG110415ADG-GF
NEG112015LMT-GF
NEG112915LMT-GF
NEG 120315 LMT-GF
NEG120515 LMT-GF
RB031815ADG-GF
RB113015ADG-GF
RB1111615LEA-GF
NEG1020116LEA-GF
NEG1020416ADG-GF
NEG1022416ADG-GF
RB1072315ADG-GF
RB2010616LEA-GF
RB032515ADG-GF
RB1043015ADG-GF
NEG071715ADG-GF
NEG020816LEA-GF
EB1072915ADG-GF
RB111615LEA-GF
NEG091515ADG-GF
NEG020916LEA-GF
RB073115ADG-GF
NEG1011316ADG-GF
NEG1012616ADG-GF
NEG1110315ADG-GF
NEG1111015ADG-GF
RB032315LEA-GF
RB062315LEA-GF
RB062915LEA-GF
RB1062415LEA-GF
RB072615ADG-GF
NEG092115ADG-GF
NEG101515ADG-GF
NEG111015ADG-GF
EB052115ADG-GF
EB060115ADG-GF
EB1051915ADG-GF
RB021115ADG-GF
RB1073115ADG-GF
RB012015ADG-GF
RB020515LEA-GF
RB021115LEA-GF
RB021915ADG-GF
RB021915LEA-GF
RB032315ADG-GF
RB040115LEA-GF
RB061515LEA-GF
RB062415LEA-GF
RB062515LEA-GF
RB073115LEA-GF
RB1032315ADG-GF
RB1063015LEA-GF
RB111115ADG-GF
RB111315LEA-GF
RB112015ADG-GF
RB1010616LEA-GF
RB1110915LEA-GF
NEG1021616LEA-GF
RB1072615ADG-GF
