# Supplementary material for: Examining performance and likelihood ratios for two likelihood ratio systems using the PROVEDIt dataset
Source: PLoS One. 2021 Sep 17;16(9):e0256714. doi: 10.1371/journal.pone.0256714 (PMC8448353; doi:10.1371/journal.pone.0256714)
Supplement: S5 Table — (XLSX) [file pone.0256714.s010.xlsx]

## Sheet: S5 Table
Mixture Profile	POI	NOC	Log10(LR)STRmix	Log10(LR)EFM	Total Amount (pg)	Ratio	Log10(LR)STRmix - Log10(LR)EFM	Log10(LR)EFM - Log10(LR)STRmix	Treatment
A02_RD14-0003-31_32-1;1-M2c-0.03GF-Q2.0_01.15sec	C58A_Asian	2	#NUM!	-3.99074	30	1;1	#NUM!	#NUM!	c
A02_RD14-0003-31_32-1;1-M2c-0.03GF-Q2.0_01.15sec	ZA08589_Hisp	2	#NUM!	-5.21425	30	1;1	#NUM!	#NUM!	c
A02_RD14-0003-44_45-1;1-M2U105-0.062GF-Q3.1_01.15sec	C51B_AA	2	#NUM!	-16.0198	62	1;1	#NUM!	#NUM!	U105
A02_RD14-0003-44_45-1;1-M2U105-0.062GF-Q3.1_01.15sec	Y1_Cauc	2	#NUM!	-18.1817	62	1;1	#NUM!	#NUM!	U105
A02_RD14-0003-44_45-1;1-M4I35-0.062GF-QLAND_01.15sec	C98B_AA	2	#NUM!	-7.54769	62	1;1	#NUM!	#NUM!	I35
A03_RD14-0003-40_41-1;4-M2U105-0.315GF-Q4.7_01.15sec	C14A_Asian	2	#NUM!	-22.0634	315	1;4	#NUM!	#NUM!	U105
A03_RD14-0003-40_41-1;4-M2U105-0.315GF-Q4.7_01.15sec	UT57292_Cauc	2	#NUM!	-12.9051	315	1;4	#NUM!	#NUM!	U105
A03_RD14-0003-40_41-1;4-M3I35-0.315GF-QLAND_01.15sec	C44B_AA	2	#NUM!	-23.1252	315	1;4	#NUM!	#NUM!	I35
A03_RD14-0003-40_41-1;4-M3I35-0.315GF-QLAND_01.15sec	ZT81342_Cauc	2	#NUM!	-24.2651	315	1;4	#NUM!	#NUM!	I35
A03_RD14-0003-40_41-1;4-M4a-0.075GF-Q0.6_01.15sec	C12B_AA	2	#NUM!	-15.8582	75	1;4	#NUM!	#NUM!	a
A03_RD14-0003-40_41-1;4-M4a-0.075GF-Q0.6_01.15sec	C27C_Cauc	2	#NUM!	-13.924	75	1;4	#NUM!	#NUM!	a
A04_RD14-0003-33_34-1;2-M3c-0.045GF-Q1.0_01.15sec	MT94833_Cauc	2	#NUM!	-18.4706	45	1;2	#NUM!	#NUM!	c
A04_RD14-0003-33_34-1;2-M3c-0.045GF-Q1.0_01.15sec	OT05587_AA	2	#NUM!	-12.1757	45	1;2	#NUM!	#NUM!	c
A04_RD14-0003-40_41-1;4-M3e-0.155GF-Q0.8_01.15sec	UT57287_Cauc	2	#NUM!	-20.7695	155	1;4	#NUM!	#NUM!	e
A04_RD14-0003-40_41-1;4-M3e-0.155GF-Q0.8_01.15sec	Y24_Hisp	2	#NUM!	-14.0937	155	1;4	#NUM!	#NUM!	e
A04_RD14-0003-42_43-1;9-M1U60-0.31GF-Q0.5_01.15sec	C11A_Asian	2	#NUM!	-44.6252	310	1;9	#NUM!	#NUM!	U60
A04_RD14-0003-42_43-1;9-M1U60-0.31GF-Q0.5_01.15sec	C38B_AA	2	#NUM!	-47.0097	310	1;9	#NUM!	#NUM!	U60
A04_RD14-0003-42_43-1;9-M3I22-0.31GF-Q1.5_01.15sec	JT51487_AA	2	#NUM!	-17.2384	310	1;9	#NUM!	#NUM!	I22
A04_RD14-0003-42_43-1;9-M3I22-0.31GF-Q1.5_01.15sec	OT05600_AA	2	#NUM!	-28.1753	310	1;9	#NUM!	#NUM!	I22
A05_RD14-0003-33_34-1;2-M4e-0.045GF-Q3.2_01.15sec	MT97199_Cauc	2	#NUM!	-7.40098	45	1;2	#NUM!	#NUM!	e
A06_RD14-0003-48_49-1;4-M3c-0.155GF-Q0.8_01.15sec	C32B_AA	2	#NUM!	-21.2951	155	1;4	#NUM!	#NUM!	c
A06_RD14-0003-48_49-1;4-M3c-0.155GF-Q0.8_01.15sec	Y21_Hisp	2	#NUM!	-21.5549	155	1;4	#NUM!	#NUM!	c
A07_RD14-0003-48_49-1;4-M3e-0.155GF-Q1.0_01.15sec	C31A_Asian	2	#NUM!	-6.70072	155	1;4	#NUM!	#NUM!	e
A07_RD14-0003-48_49-1;4-M3e-0.155GF-Q1.0_01.15sec	TT51682_Cauc	2	#NUM!	-11.1411	155	1;4	#NUM!	#NUM!	e
A08_RD14-0003-35_50-1;9-M3a-0.15GF-Q0.8_01.15sec	PT84212_AA	2	#NUM!	-40.2355	150	1;9	#NUM!	#NUM!	a
A08_RD14-0003-35_50-1;9-M3a-0.15GF-Q0.8_01.15sec	ZT80626_Hisp	2	#NUM!	-39.5007	150	1;9	#NUM!	#NUM!	a
A09_RD14-0003-35_50-1;9-M3d-0.15GF-Q0.9_01.15sec	JT51178_Cauc	2	#NUM!	-19.036	150	1;9	#NUM!	#NUM!	d
A09_RD14-0003-35_50-1;9-M3d-0.15GF-Q0.9_01.15sec	PT85278_Hisp	2	#NUM!	-15.6956	150	1;9	#NUM!	#NUM!	d
A10_RD14-0003-39_40-1;2-M3a-0.093GF-Q0.8_01.15sec	MT94842_Cauc	2	#NUM!	-23.4477	93	1;2	#NUM!	#NUM!	a
A10_RD14-0003-39_40-1;2-M3a-0.093GF-Q0.8_01.15sec	PT84185_AA	2	#NUM!	-16.9307	93	1;2	#NUM!	#NUM!	a
A11_RD14-0003-39_40-1;2-M3d-0.093GF-Q1.5_01.15sec	Y28_Hisp	2	#NUM!	-2.57001	93	1;2	#NUM!	#NUM!	d
A11_RD14-0003-39_40-1;2-M3d-0.093GF-Q1.5_01.15sec	ZT80255_Hisp	2	#NUM!	-8.98184	93	1;2	#NUM!	#NUM!	d
B01_RD14-0003-44_45-1;1-M2S30-0.25GF-Q3.0_02.15sec	C50C_Cauc	2	#NUM!	-11.4897	250	1;1	#NUM!	#NUM!	S30
B01_RD14-0003-44_45-1;1-M2S30-0.25GF-Q3.0_02.15sec	Y32_Cauc	2	#NUM!	-18.5547	250	1;1	#NUM!	#NUM!	S30
B01_RD14-0003-44_45-1;1-M2U15-0.126GF-Q0.7_02.15sec	C45B_AA	2	#NUM!	-34.868	126	1;1	#NUM!	#NUM!	U15
B01_RD14-0003-44_45-1;1-M2U15-0.126GF-Q0.7_02.15sec	TT50720_Cauc	2	#NUM!	-60.1173	126	1;1	#NUM!	#NUM!	U15
B01_RD14-0003-44_45-1;1-M3a-0.25GF-Q0.5_02.15sec	C54B_AA	2	#NUM!	-59.7336	250	1;1	#NUM!	#NUM!	a
B01_RD14-0003-44_45-1;1-M3a-0.25GF-Q0.5_02.15sec	C81B_AA	2	#NUM!	-71.5638	250	1;1	#NUM!	#NUM!	a
B01_RD14-0003-44_45-1;1-M3I15-0.126GF-Q1.2_02.15sec	C18H_Hisp	2	#NUM!	-31.3243	126	1;1	#NUM!	#NUM!	I15
B01_RD14-0003-44_45-1;1-M3I15-0.126GF-Q1.2_02.15sec	PT84230_AA	2	#NUM!	-26.8216	126	1;1	#NUM!	#NUM!	I15
B02_RD14-0003-42_43-1;9-M1S10-0.75GF-Q1.2_02.15sec	C11A_Asian	2	#NUM!	-34.3766	750	1;9	#NUM!	#NUM!	S10
B02_RD14-0003-42_43-1;9-M1S10-0.75GF-Q1.2_02.15sec	MT94892_Cauc	2	#NUM!	-51.5162	750	1;9	#NUM!	#NUM!	S10
B02_RD14-0003-44_45-1;1-M2e-0.25GF-Q0.8_02.15sec	GT37828_Hisp	2	#NUM!	-14.4677	250	1;1	#NUM!	#NUM!	e
B02_RD14-0003-44_45-1;1-M2e-0.25GF-Q0.8_02.15sec	WT52482_Cauc	2	#NUM!	-29.9122	250	1;1	#NUM!	#NUM!	e
B04_RD14-0003-33_34-1;2-M2d-0.375GF-Q1.1_02.15sec	C29H_Hisp	2	#NUM!	-52.98	375	1;2	#NUM!	#NUM!	d
B04_RD14-0003-33_34-1;2-M2d-0.375GF-Q1.1_02.15sec	Y2_Cauc	2	#NUM!	-40.3709	375	1;2	#NUM!	#NUM!	d
B04_RD14-0003-42_43-1;9-M3I22-0.15GF-Q1.5_02.15sec	OT05599_AA	2	#NUM!	-7.81974	150	1;9	#NUM!	#NUM!	I22
B05_RD14-0003-48_49-1;4-M2a-0.625GF-Q0.7_02.15sec	C18C_Cauc	2	#NUM!	-83.5736	625	1;4	#NUM!	#NUM!	a
B05_RD14-0003-48_49-1;4-M2a-0.625GF-Q0.7_02.15sec	C76H_Hisp	2	#NUM!	-53.1729	625	1;4	#NUM!	#NUM!	a
B06_RD14-0003-48_49-1;4-M3c-0.075GF-Q0.8_02.15sec	C100H_Hisp	2	#NUM!	-4.54679	75	1;4	#NUM!	#NUM!	c
B06_RD14-0003-48_49-1;4-M3c-0.075GF-Q0.8_02.15sec	OT05588_AA	2	#NUM!	-4.97039	75	1;4	#NUM!	#NUM!	c
B07_RD14-0003-48_49-1;4-M3e-0.075GF-Q1.0_02.15sec	C75C_Cauc	2	#NUM!	-2.71804	75	1;4	#NUM!	#NUM!	e
B07_RD14-0003-48_49-1;4-M3e-0.075GF-Q1.0_02.15sec	C96C_Cauc	2	#NUM!	-6.54598	75	1;4	#NUM!	#NUM!	e
B08_RD14-0003-35_50-1;9-M2c-0.75GF-Q0.7_02.15sec	C37A_Asian	2	#NUM!	-81.0133	750	1;9	#NUM!	#NUM!	c
B08_RD14-0003-35_50-1;9-M2c-0.75GF-Q0.7_02.15sec	PT83909_AA	2	#NUM!	-79.8237	750	1;9	#NUM!	#NUM!	c
B09_RD14-0003-35_50-1;9-M2e-0.75GF-Q0.9_02.15sec	C39H_Hisp	2	#NUM!	-52.0014	750	1;9	#NUM!	#NUM!	e
B09_RD14-0003-35_50-1;9-M2e-0.75GF-Q0.9_02.15sec	PT84180_AA	2	#NUM!	-59.0036	750	1;9	#NUM!	#NUM!	e
B10_RD14-0003-39_40-1;2-M3a-0.045GF-Q0.8_02.15sec	C66C_Cauc	2	#NUM!	-9.01098	45	1;2	#NUM!	#NUM!	a
B10_RD14-0003-39_40-1;2-M3a-0.045GF-Q0.8_02.15sec	TT51693_Cauc	2	#NUM!	-11.4343	45	1;2	#NUM!	#NUM!	a
C01_RD14-0003-31_32-1;1-M2a-0.126GF-Q1.2_03.15sec	C04C_Cauc	2	#NUM!	-36.637	126	1;1	#NUM!	#NUM!	a
C01_RD14-0003-31_32-1;1-M2a-0.126GF-Q1.2_03.15sec	MT97173_Cauc	2	#NUM!	-22.2976	126	1;1	#NUM!	#NUM!	a
C01_RD14-0003-44_45-1;1-M2S30-0.126GF-Q3.0_03.15sec	C05Ba_AA	2	#NUM!	-14.5188	126	1;1	#NUM!	#NUM!	S30
C01_RD14-0003-44_45-1;1-M2S30-0.126GF-Q3.0_03.15sec	C35B_AA	2	#NUM!	-15.1762	126	1;1	#NUM!	#NUM!	S30
C01_RD14-0003-44_45-1;1-M3a-0.126GF-Q0.5_03.15sec	C41B_AA	2	#NUM!	-41.9506	126	1;1	#NUM!	#NUM!	a
C01_RD14-0003-44_45-1;1-M3a-0.126GF-Q0.5_03.15sec	C49C_Cauc	2	#NUM!	-35.2381	126	1;1	#NUM!	#NUM!	a
C01_RD14-0003-44_45-1;1-M3U15-0.062GF-Q0.9_03.15sec	MT97179_Cauc	2	#NUM!	-16.9313	62	1;1	#NUM!	#NUM!	U15
C01_RD14-0003-44_45-1;1-M4I15-0.062GF-Q1.2_03.15sec	WT51358_Cauc	2	#NUM!	-22.1756	62	1;1	#NUM!	#NUM!	I15
C02_RD14-0003-40_41-1;4-M2U15-0.315GF-Q1.1_03.15sec	JT51462_AA	2	#NUM!	-30.7425	315	1;4	#NUM!	#NUM!	U15
C02_RD14-0003-40_41-1;4-M2U15-0.315GF-Q1.1_03.15sec	MT95364_AA	2	#NUM!	-29.8453	315	1;4	#NUM!	#NUM!	U15
C02_RD14-0003-40_41-1;4-M3I15-0.315GF-Q1.1_03.15sec	C43C_Cauc	2	#NUM!	-25.0407	315	1;4	#NUM!	#NUM!	I15
C02_RD14-0003-40_41-1;4-M3I15-0.315GF-Q1.1_03.15sec	C93C_Cauc	2	#NUM!	-26.6885	315	1;4	#NUM!	#NUM!	I15
C02_RD14-0003-42_43-1;9-M1S10-0.63GF-Q1.2_03.15sec	PT86536_Cauc	2	#NUM!	-38.4556	630	1;9	#NUM!	#NUM!	S10
C02_RD14-0003-42_43-1;9-M1S10-0.63GF-Q1.2_03.15sec	ZT80925_Hisp	2	#NUM!	-37.8877	630	1;9	#NUM!	#NUM!	S10
C02_RD14-0003-44_45-1;1-M3e-0.126GF-Q1.1_03.15sec	UT58336_Cauc	2	#NUM!	-10.1535	126	1;1	#NUM!	#NUM!	e
C02_RD14-0003-44_45-1;1-M3e-0.126GF-Q1.1_03.15sec	ZC08844_Cauc	2	#NUM!	-11.2574	126	1;1	#NUM!	#NUM!	e
C03_RD14-0003-40_41-1;4-M2U105-0.155GF-Q4.7_03.15sec	C14C_Cauc	2	#NUM!	-10.0881	155	1;4	#NUM!	#NUM!	U105
C03_RD14-0003-40_41-1;4-M2U105-0.155GF-Q4.7_03.15sec	C78C_Cauc	2	#NUM!	-11.7451	155	1;4	#NUM!	#NUM!	U105
C03_RD14-0003-40_41-1;4-M4I35-0.155GF-QLAND_03.15sec	C43B_AA	2	#NUM!	-15.8641	155	1;4	#NUM!	#NUM!	I35
C03_RD14-0003-40_41-1;4-M4I35-0.155GF-QLAND_03.15sec	ZT80334_Hisp	2	#NUM!	-15.4619	155	1;4	#NUM!	#NUM!	I35
C04_RD14-0003-33_34-1;2-M2d-0.189GF-Q1.1_03.15sec	C57B_AA	2	#NUM!	-30.3179	189	1;2	#NUM!	#NUM!	d
C04_RD14-0003-33_34-1;2-M2d-0.189GF-Q1.1_03.15sec	C89A_Asian	2	#NUM!	-29.2814	189	1;2	#NUM!	#NUM!	d
C04_RD14-0003-42_43-1;9-M1U105-0.54GF-Q0.6_03.15sec	C68H_Hisp	2	#NUM!	-79.8382	540	1;9	#NUM!	#NUM!	U105
C04_RD14-0003-42_43-1;9-M1U105-0.54GF-Q0.6_03.15sec	JT51476_AA	2	#NUM!	-55.3829	540	1;9	#NUM!	#NUM!	U105
C04_RD14-0003-42_43-1;9-M2I35-0.63GF-QLAND_03.15sec	C12H_Hisp	2	#NUM!	-42.9149	630	1;9	#NUM!	#NUM!	I35
C04_RD14-0003-42_43-1;9-M2I35-0.63GF-QLAND_03.15sec	TT51680_Cauc	2	#NUM!	-48.8194	630	1;9	#NUM!	#NUM!	I35
C06_RD14-0003-48_49-1;4-M2d-0.625GF-Q0.8_03.15sec	C30C_Cauc	2	#NUM!	-62.9904	625	1;4	#NUM!	#NUM!	d
C06_RD14-0003-48_49-1;4-M2d-0.625GF-Q0.8_03.15sec	C33C_Cauc	2	#NUM!	-47.4684	625	1;4	#NUM!	#NUM!	d
C08_RD14-0003-35_50-1;9-M2c-0.63GF-Q0.7_03.15sec	MT95379_AA	2	#NUM!	-60.4835	630	1;9	#NUM!	#NUM!	c
C08_RD14-0003-35_50-1;9-M2c-0.63GF-Q0.7_03.15sec	PT83913_AA	2	#NUM!	-72.7663	630	1;9	#NUM!	#NUM!	c
C09_RD14-0003-35_50-1;9-M2e-0.63GF-Q0.9_03.15sec	C79B_AA	2	#NUM!	-55.8429	630	1;9	#NUM!	#NUM!	e
C09_RD14-0003-35_50-1;9-M2e-0.63GF-Q0.9_03.15sec	PT84209_AA	2	#NUM!	-41.7916	630	1;9	#NUM!	#NUM!	e
D01_RD14-0003-31_32-1;1-M2a-0.062GF-Q1.2_04.15sec	C22A_Asian	2	#NUM!	-25.3333	62	1;1	#NUM!	#NUM!	a
D01_RD14-0003-31_32-1;1-M2a-0.062GF-Q1.2_04.15sec	C62C_Cauc	2	#NUM!	-24.003	62	1;1	#NUM!	#NUM!	a
D01_RD14-0003-44_45-1;1-M3a-0.062GF-Q0.5_04.15sec	C35A_Asian	2	#NUM!	-27.9897	62	1;1	#NUM!	#NUM!	a
D01_RD14-0003-44_45-1;1-M3a-0.062GF-Q0.5_04.15sec	JT51476_AA	2	#NUM!	-35.3325	62	1;1	#NUM!	#NUM!	a
D01_RD14-0003-44_45-1;1-M4U15-0.03GF-Q1.3_04.15sec	WT51373_Cauc	2	#NUM!	-4.45109	30	1;1	#NUM!	#NUM!	U15
D02_RD14-0003-40_41-1;4-M4I15-0.155GF-Q1.0_04.15sec	PT83978_AA	2	#NUM!	-18.6698	155	1;4	#NUM!	#NUM!	I15
D02_RD14-0003-40_41-1;4-M4I15-0.155GF-Q1.0_04.15sec	UT58333_Cauc	2	#NUM!	-25.1729	155	1;4	#NUM!	#NUM!	I15
D02_RD14-0003-40_41-1;4-M4U15-0.155GF-Q1.8_04.15sec	C18A_Asian	2	#NUM!	-6.27156	155	1;4	#NUM!	#NUM!	U15
D02_RD14-0003-40_41-1;4-M4U15-0.155GF-Q1.8_04.15sec	OT05560_AA	2	#NUM!	-6.11995	155	1;4	#NUM!	#NUM!	U15
D02_RD14-0003-42_43-1;9-M1S10-0.31GF-Q1.2_04.15sec	C99A_Asian	2	#NUM!	-20.9237	310	1;9	#NUM!	#NUM!	S10
D02_RD14-0003-42_43-1;9-M1S10-0.31GF-Q1.2_04.15sec	UA16894_Cauc	2	#NUM!	-22.3015	310	1;9	#NUM!	#NUM!	S10
D03_RD14-0003-33_34-1;2-M3a-0.093GF-Q0.8_04.15sec	C05A_Asian	2	#NUM!	-25.3146	93	1;2	#NUM!	#NUM!	a
D03_RD14-0003-33_34-1;2-M3a-0.093GF-Q0.8_04.15sec	GT37542_Hisp	2	#NUM!	-30.9833	93	1;2	#NUM!	#NUM!	a
D03_RD14-0003-40_41-1;4-M4I35-0.075GF-QLAND_04.15sec	C05A_Asian	2	#NUM!	-3.30737	75	1;4	#NUM!	#NUM!	I35
D04_RD14-0003-33_34-1;2-M4d-0.093GF-Q1.3_04.15sec	C13B_AA	2	#NUM!	-13.3756	93	1;2	#NUM!	#NUM!	d
D04_RD14-0003-33_34-1;2-M4d-0.093GF-Q1.3_04.15sec	PT84183_AA	2	#NUM!	-11.0437	93	1;2	#NUM!	#NUM!	d
D04_RD14-0003-42_43-1;9-M1U105-0.31GF-Q0.6_04.15sec	PT84224_AA	2	#NUM!	-30.1931	310	1;9	#NUM!	#NUM!	U105
D04_RD14-0003-42_43-1;9-M1U105-0.31GF-Q0.6_04.15sec	PT84247_AA	2	#NUM!	-43.3914	310	1;9	#NUM!	#NUM!	U105
D04_RD14-0003-42_43-1;9-M2a-0.63GF-Q0.5_04.15sec	C45A_Asian	2	#NUM!	-55.3066	630	1;9	#NUM!	#NUM!	a
D04_RD14-0003-42_43-1;9-M2a-0.63GF-Q0.5_04.15sec	PT83912_AA	2	#NUM!	-55.3706	630	1;9	#NUM!	#NUM!	a
D04_RD14-0003-42_43-1;9-M2I35-0.31GF-QLAND_04.15sec	C15A_Asian	2	#NUM!	-24.4639	310	1;9	#NUM!	#NUM!	I35
D04_RD14-0003-42_43-1;9-M2I35-0.31GF-QLAND_04.15sec	C17B_AA	2	#NUM!	-33.4023	310	1;9	#NUM!	#NUM!	I35
D05_RD14-0003-48_49-1;4-M3a-0.315GF-Q0.6_04.15sec	GT38087_Cauc	2	#NUM!	-62.3458	315	1;4	#NUM!	#NUM!	a
D05_RD14-0003-48_49-1;4-M3a-0.315GF-Q0.6_04.15sec	OT05563_AA	2	#NUM!	-42.2577	315	1;4	#NUM!	#NUM!	a
D06_RD14-0003-48_49-1;4-M2d-0.315GF-Q0.8_04.15sec	C45A_Asian	2	#NUM!	-20.3306	315	1;4	#NUM!	#NUM!	d
D06_RD14-0003-48_49-1;4-M2d-0.315GF-Q0.8_04.15sec	ZT80334_Hisp	2	#NUM!	-34.5565	315	1;4	#NUM!	#NUM!	d
D08_RD14-0003-35_50-1;9-M2c-0.31GF-Q0.7_04.15sec	C26A_Asian	2	#NUM!	-61.9019	310	1;9	#NUM!	#NUM!	c
D08_RD14-0003-35_50-1;9-M2c-0.31GF-Q0.7_04.15sec	C39A_Asian	2	#NUM!	-29.5741	310	1;9	#NUM!	#NUM!	c
D09_RD14-0003-35_50-1;9-M2e-0.31GF-Q0.9_04.15sec	MT94892_Cauc	2	#NUM!	-39.5016	310	1;9	#NUM!	#NUM!	e
D09_RD14-0003-35_50-1;9-M2e-0.31GF-Q0.9_04.15sec	ZT81382_Cauc	2	#NUM!	-31.5022	310	1;9	#NUM!	#NUM!	e
D10_RD14-0003-39_40-1;2-M2c-0.189GF-Q1.0_04.15sec	C02A_Asian	2	#NUM!	-36.5837	189	1;2	#NUM!	#NUM!	c
D10_RD14-0003-39_40-1;2-M2c-0.189GF-Q1.0_04.15sec	C59H_Hisp	2	#NUM!	-19.4608	189	1;2	#NUM!	#NUM!	c
D11_RD14-0003-39_40-1;2-M2e-0.189GF-Q2.2_04.15sec	C49H_Hisp	2	#NUM!	-20.2141	189	1;2	#NUM!	#NUM!	e
D11_RD14-0003-39_40-1;2-M2e-0.189GF-Q2.2_04.15sec	ZA08588_Hisp	2	#NUM!	-21.2656	189	1;2	#NUM!	#NUM!	e
E01_RD14-0003-31_32-1;1-M2a-0.03GF-Q1.2_05.15sec	C39H_Hisp	2	#NUM!	-9.06057	30	1;1	#NUM!	#NUM!	a
E01_RD14-0003-31_32-1;1-M2a-0.03GF-Q1.2_05.15sec	Y23_Hisp	2	#NUM!	-11.3404	30	1;1	#NUM!	#NUM!	a
E01_RD14-0003-44_45-1;1-M2U60-0.126GF-Q2.1_05.15sec	C36A_Asian	2	#NUM!	-20.5508	126	1;1	#NUM!	#NUM!	U60
E01_RD14-0003-44_45-1;1-M2U60-0.126GF-Q2.1_05.15sec	C94B_AA	2	#NUM!	-15.6878	126	1;1	#NUM!	#NUM!	U60
E01_RD14-0003-44_45-1;1-M3I22-0.126GF-Q2.4_05.15sec	C28A_Asian	2	#NUM!	-26.1379	126	1;1	#NUM!	#NUM!	I22
E01_RD14-0003-44_45-1;1-M3I22-0.126GF-Q2.4_05.15sec	GT36886_Cauc	2	#NUM!	-21.2575	126	1;1	#NUM!	#NUM!	I22
E01_RD14-0003-44_45-1;1-M4a-0.031GF-Q0.5_05.15sec	MT97196_Cauc	2	#NUM!	-12.7023	31	1;1	#NUM!	#NUM!	a
E02_RD14-0003-40_41-1;4-M4I15-0.075GF-Q1.0_05.15sec	C88A_Asian	2	#NUM!	-10.9288	75	1;4	#NUM!	#NUM!	I15
E02_RD14-0003-40_41-1;4-M4U15-0.075GF-Q1.8_05.15sec	PT84211_AA	2	#NUM!	-5.58303	75	1;4	#NUM!	#NUM!	U15
E02_RD14-0003-42_43-1;9-M2S10-0.15GF-Q1.0_05.15sec	UA16918_Cauc	2	#NUM!	-20.2121	150	1;9	#NUM!	#NUM!	S10
E03_RD14-0003-33_34-1;2-M3a-0.045GF-Q0.8_05.15sec	C61H_Hisp	2	#NUM!	-16.0753	45	1;2	#NUM!	#NUM!	a
E03_RD14-0003-33_34-1;2-M3a-0.045GF-Q0.8_05.15sec	PT84227_AA	2	#NUM!	-19.6389	45	1;2	#NUM!	#NUM!	a
E03_RD14-0003-42_43-1;9-M1U15-0.63GF-Q0.5_05.15sec	C01C_Cauc	2	#NUM!	-58.2126	630	1;9	#NUM!	#NUM!	U15
E03_RD14-0003-42_43-1;9-M1U15-0.63GF-Q0.5_05.15sec	GT38066_Cauc	2	#NUM!	-78.2334	630	1;9	#NUM!	#NUM!	U15
E03_RD14-0003-42_43-1;9-M2I15-0.63GF-Q0.7_05.15sec	GT37178_AA	2	#NUM!	-25.016	630	1;9	#NUM!	#NUM!	I15
E03_RD14-0003-42_43-1;9-M2I15-0.63GF-Q0.7_05.15sec	WT52472_Cauc	2	#NUM!	-58.1282	630	1;9	#NUM!	#NUM!	I15
E04_RD14-0003-33_34-1;2-M4d-0.045GF-Q1.3_05.15sec	JT51488_AA	2	#NUM!	-0.633766	45	1;2	#NUM!	#NUM!	d
E04_RD14-0003-42_43-1;9-M2a-0.31GF-Q0.5_05.15sec	C81B_AA	2	#NUM!	-48.4095	310	1;9	#NUM!	#NUM!	a
E04_RD14-0003-42_43-1;9-M2a-0.31GF-Q0.5_05.15sec	C97H_Hisp	2	#NUM!	-47.7928	310	1;9	#NUM!	#NUM!	a
E04_RD14-0003-42_43-1;9-M2U105-0.15GF-Q10.4_05.15sec	C75C_Cauc	2	#NUM!	-3.13485	150	1;9	#NUM!	#NUM!	U105
E04_RD14-0003-42_43-1;9-M3I35-0.15GF-QLAND_05.15sec	OT07753_Cauc	2	#NUM!	-7.0078	150	1;9	#NUM!	#NUM!	I35
E05_RD14-0003-42_43-1;9-M1e-0.63GF-Q1.3_05.15sec	C36C_Cauc	2	#NUM!	-24.3559	630	1;9	#NUM!	#NUM!	e
E05_RD14-0003-42_43-1;9-M1e-0.63GF-Q1.3_05.15sec	PT84348_Hisp	2	#NUM!	-19.0471	630	1;9	#NUM!	#NUM!	e
E05_RD14-0003-48_49-1;4-M3a-0.155GF-Q0.6_05.15sec	C51H_Hisp	2	#NUM!	-23.649	155	1;4	#NUM!	#NUM!	a
E05_RD14-0003-48_49-1;4-M3a-0.155GF-Q0.6_05.15sec	PT85612_Hisp	2	#NUM!	-28.7343	155	1;4	#NUM!	#NUM!	a
E06_RD14-0003-48_49-1;4-M3d-0.155GF-Q0.9_05.15sec	OT05588_AA	2	#NUM!	-13.3059	155	1;4	#NUM!	#NUM!	d
E06_RD14-0003-48_49-1;4-M3d-0.155GF-Q0.9_05.15sec	TT51407_Hisp	2	#NUM!	-11.2317	155	1;4	#NUM!	#NUM!	d
E08_RD14-0003-35_50-1;9-M3c-0.15GF-Q0.8_05.15sec	C32H_Hisp	2	#NUM!	-24.0962	150	1;9	#NUM!	#NUM!	c
E08_RD14-0003-35_50-1;9-M3c-0.15GF-Q0.8_05.15sec	OT07803_Cauc	2	#NUM!	-24.2121	150	1;9	#NUM!	#NUM!	c
E10_RD14-0003-39_40-1;2-M3c-0.093GF-Q1.0_05.15sec	C72H_Hisp	2	#NUM!	-10.2738	93	1;2	#NUM!	#NUM!	c
F01_RD14-0003-40_41-1;4-M1S30-0.625GF-Q3.2_06.15sec	C70C_Cauc	2	#NUM!	-14.4363	625	1;4	#NUM!	#NUM!	S30
F01_RD14-0003-40_41-1;4-M1S30-0.625GF-Q3.2_06.15sec	C82A_Asian	2	#NUM!	-22.2053	625	1;4	#NUM!	#NUM!	S30
F01_RD14-0003-44_45-1;1-M2d-0.25GF-Q0.7_06.15sec	C90H_Hisp	2	#NUM!	-30.2158	250	1;1	#NUM!	#NUM!	d
F01_RD14-0003-44_45-1;1-M2d-0.25GF-Q0.7_06.15sec	WA29594_Cauc	2	#NUM!	-43.1939	250	1;1	#NUM!	#NUM!	d
F01_RD14-0003-44_45-1;1-M3U60-0.062GF-Q4.2_06.15sec	MT97124_Cauc	2	#NUM!	-13.5497	62	1;1	#NUM!	#NUM!	U60
F01_RD14-0003-44_45-1;1-M3U60-0.062GF-Q4.2_06.15sec	PT83902_AA	2	#NUM!	-6.53156	62	1;1	#NUM!	#NUM!	U60
F01_RD14-0003-44_45-1;1-M4I22-0.062GF-Q2.0_06.15sec	C23A_Asian	2	#NUM!	-11.5634	62	1;1	#NUM!	#NUM!	I22
F01_RD14-0003-44_45-1;1-M4I22-0.062GF-Q2.0_06.15sec	C94C_Cauc	2	#NUM!	-9.54581	62	1;1	#NUM!	#NUM!	I22
F02_RD14-0003-40_41-1;4-M2U60-0.315GF-Q3.9_06.15sec	MT94846_Cauc	2	#NUM!	-17.425	315	1;4	#NUM!	#NUM!	U60
F02_RD14-0003-40_41-1;4-M2U60-0.315GF-Q3.9_06.15sec	ZT79848_Hisp	2	#NUM!	-21.2121	315	1;4	#NUM!	#NUM!	U60
F02_RD14-0003-40_41-1;4-M3I22-0.315GF-Q1.7_06.15sec	C65A_Asian	2	#NUM!	-32.4518	315	1;4	#NUM!	#NUM!	I22
F02_RD14-0003-40_41-1;4-M3I22-0.315GF-Q1.7_06.15sec	OT07785_Cauc	2	#NUM!	-33.5031	315	1;4	#NUM!	#NUM!	I22
F03_RD14-0003-40_41-1;4-M4d-0.075GF-Q0.6_06.15sec	MT95357_AA	2	#NUM!	-6.57557	75	1;4	#NUM!	#NUM!	d
F03_RD14-0003-40_41-1;4-M4d-0.075GF-Q0.6_06.15sec	PT85300_Hisp	2	#NUM!	-5.25354	75	1;4	#NUM!	#NUM!	d
F03_RD14-0003-42_43-1;9-M2U15-0.31GF-Q0.9_06.15sec	C80H_Hisp	2	#NUM!	-24.5964	310	1;9	#NUM!	#NUM!	U15
F03_RD14-0003-42_43-1;9-M2U15-0.31GF-Q0.9_06.15sec	MT97195_Cauc	2	#NUM!	-30.0254	310	1;9	#NUM!	#NUM!	U15
F03_RD14-0003-42_43-1;9-M3I15-0.31GF-Q1.2_06.15sec	ZT80090_Hisp	2	#NUM!	-21.1918	310	1;9	#NUM!	#NUM!	I15
F03_RD14-0003-42_43-1;9-M3I15-0.31GF-Q1.2_06.15sec	ZT80245_Hisp	2	#NUM!	-25.6648	310	1;9	#NUM!	#NUM!	I15
F04_RD14-0003-33_34-1;2-M2e-0.375GF-Q1.9_06.15sec	C21A_Asian	2	#NUM!	-31.084	375	1;2	#NUM!	#NUM!	e
F04_RD14-0003-33_34-1;2-M2e-0.375GF-Q1.9_06.15sec	ZT79322_AA	2	#NUM!	-23.9306	375	1;2	#NUM!	#NUM!	e
F04_RD14-0003-42_43-1;9-M3a-0.15GF-Q0.5_06.15sec	C03H_Hisp	2	#NUM!	-15.6602	150	1;9	#NUM!	#NUM!	a
F04_RD14-0003-42_43-1;9-M3a-0.15GF-Q0.5_06.15sec	ZT80154_Hisp	2	#NUM!	-18.2918	150	1;9	#NUM!	#NUM!	a
F05_RD14-0003-48_49-1;4-M3a-0.075GF-Q0.6_06.15sec	PT84348_Hisp	2	#NUM!	-22.0969	75	1;4	#NUM!	#NUM!	a
F05_RD14-0003-48_49-1;4-M3a-0.075GF-Q0.6_06.15sec	TT51676_Cauc	2	#NUM!	-19.7334	75	1;4	#NUM!	#NUM!	a
F06_RD14-0003-48_49-1;4-M3d-0.075GF-Q0.9_06.15sec	C50C_Cauc	2	#NUM!	-5.69044	75	1;4	#NUM!	#NUM!	d
F06_RD14-0003-48_49-1;4-M3d-0.075GF-Q0.9_06.15sec	C72H_Hisp	2	#NUM!	-4.23771	75	1;4	#NUM!	#NUM!	d
F07_RD14-0003-35_50-1;9-M2a-0.75GF-Q0.7_06.15sec	GT38091_Cauc	2	#NUM!	-115.626	750	1;9	#NUM!	#NUM!	a
F07_RD14-0003-35_50-1;9-M2a-0.75GF-Q0.7_06.15sec	ZT79310_AA	2	#NUM!	-97.2284	750	1;9	#NUM!	#NUM!	a
F08_RD14-0003-35_50-1;9-M2d-0.75GF-Q0.9_06.15sec	GT38070_Cauc	2	#NUM!	-46.2471	750	1;9	#NUM!	#NUM!	d
F08_RD14-0003-35_50-1;9-M2d-0.75GF-Q0.9_06.15sec	PT83919_AA	2	#NUM!	-45.1116	750	1;9	#NUM!	#NUM!	d
F09_RD14-0003-35_50-1;9-M2e-0.15GF-Q0.9_06.15sec	MT94892_Cauc	2	#NUM!	-20.1982	150	1;9	#NUM!	#NUM!	e
F09_RD14-0003-35_50-1;9-M2e-0.15GF-Q0.9_06.15sec	MT95085_AA	2	#NUM!	-14.6207	150	1;9	#NUM!	#NUM!	e
G01_RD14-0003-40_41-1;4-M2S30-0.315GF-Q2.8_07.15sec	C37C_Cauc	2	#NUM!	-12.2353	315	1;4	#NUM!	#NUM!	S30
G01_RD14-0003-40_41-1;4-M2S30-0.315GF-Q2.8_07.15sec	PT84185_AA	2	#NUM!	-16.0685	315	1;4	#NUM!	#NUM!	S30
G01_RD14-0003-44_45-1;1-M3d-0.126GF-Q0.5_07.15sec	PT83876_AA	2	#NUM!	-17.795	126	1;1	#NUM!	#NUM!	d
G01_RD14-0003-44_45-1;1-M3d-0.126GF-Q0.5_07.15sec	ZT79337_AA	2	#NUM!	-17.3487	126	1;1	#NUM!	#NUM!	d
G02_RD14-0003-31_32-1;1-M1e-0.062GF-Q14.4_07.15sec	C33B_AA	2	#NUM!	-5.57455	62	1;1	#NUM!	#NUM!	e
G02_RD14-0003-40_41-1;4-M3a-0.315GF-Q0.6_07.15sec	C38B_AA	2	#NUM!	-40.7255	315	1;4	#NUM!	#NUM!	a
G02_RD14-0003-40_41-1;4-M3a-0.315GF-Q0.6_07.15sec	GA05070_Hisp	2	#NUM!	-54.8404	315	1;4	#NUM!	#NUM!	a
G02_RD14-0003-40_41-1;4-M3U60-0.155GF-Q10.9_07.15sec	C79A_Asian	2	#NUM!	-2.94079	155	1;4	#NUM!	#NUM!	U60
G02_RD14-0003-40_41-1;4-M4I22-0.155GF-Q2.0_07.15sec	MT97145_Cauc	2	#NUM!	-12.593	155	1;4	#NUM!	#NUM!	I22
G02_RD14-0003-40_41-1;4-M4I22-0.155GF-Q2.0_07.15sec	WT51546_AA	2	#NUM!	-14.8562	155	1;4	#NUM!	#NUM!	I22
G03_RD14-0003-33_34-1;2-M2c-0.189GF-Q0.9_07.15sec	PT84230_AA	2	#NUM!	-49.2664	189	1;2	#NUM!	#NUM!	c
G03_RD14-0003-33_34-1;2-M2c-0.189GF-Q0.9_07.15sec	UT57300_Cauc	2	#NUM!	-39.2546	189	1;2	#NUM!	#NUM!	c
G03_RD14-0003-42_43-1;9-M2U15-0.15GF-Q0.9_07.15sec	C08Ba_AA	2	#NUM!	-18.9279	150	1;9	#NUM!	#NUM!	U15
G03_RD14-0003-42_43-1;9-M2U15-0.15GF-Q0.9_07.15sec	C19C_Cauc	2	#NUM!	-14.5821	150	1;9	#NUM!	#NUM!	U15
G03_RD14-0003-42_43-1;9-M3I15-0.15GF-Q1.2_07.15sec	PT83920_AA	2	#NUM!	-13.3354	150	1;9	#NUM!	#NUM!	I15
G04_RD14-0003-33_34-1;2-M2e-0.189GF-Q1.9_07.15sec	MT95095_AA	2	#NUM!	-29.8711	189	1;2	#NUM!	#NUM!	e
G04_RD14-0003-33_34-1;2-M2e-0.189GF-Q1.9_07.15sec	ZT80826_Hisp	2	#NUM!	-19.5795	189	1;2	#NUM!	#NUM!	e
G05_RD14-0003-42_43-1;9-M2e-0.15GF-Q2.5_07.15sec	MT94833_Cauc	2	#NUM!	-0.682195	150	1;9	#NUM!	#NUM!	e
G05_RD14-0003-48_49-1;4-M2c-0.625GF-Q0.7_07.15sec	PT83880_AA	2	#NUM!	-33.8825	625	1;4	#NUM!	#NUM!	c
G05_RD14-0003-48_49-1;4-M2c-0.625GF-Q0.7_07.15sec	ZT79618_AA	2	#NUM!	-60.2234	625	1;4	#NUM!	#NUM!	c
G06_RD14-0003-48_49-1;4-M2e-0.625GF-Q1.0_07.15sec	C96C_Cauc	2	#NUM!	-51.3252	625	1;4	#NUM!	#NUM!	e
G06_RD14-0003-48_49-1;4-M2e-0.625GF-Q1.0_07.15sec	C97A_Asian	2	#NUM!	-44.5045	625	1;4	#NUM!	#NUM!	e
G07_RD14-0003-35_50-1;9-M2a-0.63GF-Q0.7_07.15sec	PT83909_AA	2	#NUM!	-107.353	630	1;9	#NUM!	#NUM!	a
G07_RD14-0003-35_50-1;9-M2a-0.63GF-Q0.7_07.15sec	PT84248_AA	2	#NUM!	-121.341	630	1;9	#NUM!	#NUM!	a
G08_RD14-0003-35_50-1;9-M2d-0.63GF-Q0.9_07.15sec	C11H_Hisp	2	#NUM!	-45.3491	630	1;9	#NUM!	#NUM!	d
G08_RD14-0003-35_50-1;9-M2d-0.63GF-Q0.9_07.15sec	TT51034_Hisp	2	#NUM!	-59.3472	630	1;9	#NUM!	#NUM!	d
G09_RD14-0003-39_40-1;2-M2a-0.375GF-Q0.7_07.15sec	OT05563_AA	2	#NUM!	-103.663	375	1;2	#NUM!	#NUM!	a
G09_RD14-0003-39_40-1;2-M2a-0.375GF-Q0.7_07.15sec	PT84226_AA	2	#NUM!	-94.8098	375	1;2	#NUM!	#NUM!	a
H01_RD14-0003-44_45-1;1-M2U105-0.126GF-Q3.1_08.15sec	PT84232_AA	2	#NUM!	-14.1382	126	1;1	#NUM!	#NUM!	U105
H01_RD14-0003-44_45-1;1-M2U105-0.126GF-Q3.1_08.15sec	UC10178_Cauc	2	#NUM!	-21.2474	126	1;1	#NUM!	#NUM!	U105
H01_RD14-0003-44_45-1;1-M3I35-0.126GF-QLAND_08.15sec	BC11352_Cauc	2	#NUM!	-35.8843	126	1;1	#NUM!	#NUM!	I35
H01_RD14-0003-44_45-1;1-M3I35-0.126GF-QLAND_08.15sec	PT84227_AA	2	#NUM!	-31.3919	126	1;1	#NUM!	#NUM!	I35
H01_RD14-0003-44_45-1;1-M4d-0.062GF-Q0.9_08.15sec	MT94850_Cauc	2	#NUM!	-10.7401	62	1;1	#NUM!	#NUM!	d
H01_RD14-0003-44_45-1;1-M4d-0.062GF-Q0.9_08.15sec	Y14_AA	2	#NUM!	-13.6143	62	1;1	#NUM!	#NUM!	d
H02_RD14-0003-40_41-1;4-M3a-0.155GF-Q0.6_08.15sec	C26A_Asian	2	#NUM!	-39.7155	155	1;4	#NUM!	#NUM!	a
H02_RD14-0003-40_41-1;4-M3a-0.155GF-Q0.6_08.15sec	C65C_Cauc	2	#NUM!	-29.4118	155	1;4	#NUM!	#NUM!	a
H03_RD14-0003-33_34-1;2-M3c-0.093GF-Q1.0_08.15sec	C53C_Cauc	2	#NUM!	-15.3892	93	1;2	#NUM!	#NUM!	c
H03_RD14-0003-33_34-1;2-M3c-0.093GF-Q1.0_08.15sec	UT57288_Cauc	2	#NUM!	-22.0528	93	1;2	#NUM!	#NUM!	c
H03_RD14-0003-40_41-1;4-M3e-0.315GF-Q0.8_08.15sec	PT84180_AA	2	#NUM!	-12.9698	315	1;4	#NUM!	#NUM!	e
H03_RD14-0003-40_41-1;4-M3e-0.315GF-Q0.8_08.15sec	PT84198_AA	2	#NUM!	-12.6936	315	1;4	#NUM!	#NUM!	e
H03_RD14-0003-42_43-1;9-M2I22-0.63GF-Q1.2_08.15sec	PT83871_AA	2	#NUM!	-52.4071	630	1;9	#NUM!	#NUM!	I22
H03_RD14-0003-42_43-1;9-M2I22-0.63GF-Q1.2_08.15sec	PT86536_Cauc	2	#NUM!	-58.7819	630	1;9	#NUM!	#NUM!	I22
H04_RD14-0003-33_34-1;2-M2e-0.093GF-Q1.9_08.15sec	C29B_AA	2	#NUM!	-20.4725	93	1;2	#NUM!	#NUM!	e
H04_RD14-0003-33_34-1;2-M2e-0.093GF-Q1.9_08.15sec	MT94833_Cauc	2	#NUM!	-11.6209	93	1;2	#NUM!	#NUM!	e
H05_RD14-0003-48_49-1;4-M2c-0.315GF-Q0.7_08.15sec	MT94826_Cauc	2	#NUM!	-32.8261	315	1;4	#NUM!	#NUM!	c
H05_RD14-0003-48_49-1;4-M2c-0.315GF-Q0.7_08.15sec	TT51689_Cauc	2	#NUM!	-20.8511	315	1;4	#NUM!	#NUM!	c
H06_RD14-0003-48_49-1;4-M2e-0.315GF-Q1.0_08.15sec	PT84192_AA	2	#NUM!	-32.0335	315	1;4	#NUM!	#NUM!	e
H06_RD14-0003-48_49-1;4-M2e-0.315GF-Q1.0_08.15sec	PT85499_Hisp	2	#NUM!	-38.2513	315	1;4	#NUM!	#NUM!	e
H07_RD14-0003-35_50-1;9-M2a-0.31GF-Q0.7_08.15sec	C57A_Asian	2	#NUM!	-52.8598	310	1;9	#NUM!	#NUM!	a
H07_RD14-0003-35_50-1;9-M2a-0.31GF-Q0.7_08.15sec	MT97123_Cauc	2	#NUM!	-64.7328	310	1;9	#NUM!	#NUM!	a
H08_RD14-0003-35_50-1;9-M2d-0.31GF-Q0.9_08.15sec	TT50708_Cauc	2	#NUM!	-33.8323	310	1;9	#NUM!	#NUM!	d
H08_RD14-0003-35_50-1;9-M2d-0.31GF-Q0.9_08.15sec	UT58314_Cauc	2	#NUM!	-48.0052	310	1;9	#NUM!	#NUM!	d
H09_RD14-0003-39_40-1;2-M3a-0.189GF-Q0.8_08.15sec	MT94831_Cauc	2	#NUM!	-64.2515	189	1;2	#NUM!	#NUM!	a
H09_RD14-0003-39_40-1;2-M3a-0.189GF-Q0.8_08.15sec	UT58305_Cauc	2	#NUM!	-22.208	189	1;2	#NUM!	#NUM!	a
H10_RD14-0003-39_40-1;2-M3d-0.189GF-Q1.5_08.15sec	C78H_Hisp	2	#NUM!	-20.8173	189	1;2	#NUM!	#NUM!	d
H10_RD14-0003-39_40-1;2-M3d-0.189GF-Q1.5_08.15sec	C88H_Hisp	2	#NUM!	-13.4378	189	1;2	#NUM!	#NUM!	d
A05_RD14-0003-46_47_48-1;1;1-M3I22-0.189GF-Q0.9_01.15sec	C07H_Hisp	3	#NUM!	-7.0808	189	1;1;1	#NUM!	#NUM!	I22
A05_RD14-0003-46_47_48-1;1;1-M3I22-0.189GF-Q0.9_01.15sec	PT84411_Hisp	3	#NUM!	-7.25887	189	1;1;1	#NUM!	#NUM!	I22
A05_RD14-0003-46_47_48-1;1;1-M3I22-0.189GF-Q0.9_01.15sec	WT52486_Cauc	3	#NUM!	-9.14743	189	1;1;1	#NUM!	#NUM!	I22
A05_RD14-0003-46_47_48-1;1;1-M3U15-0.093GF-Q0.7_01.15sec	C73H_Hisp	3	#NUM!	-6.31294	93	1;1;1	#NUM!	#NUM!	U15
A05_RD14-0003-46_47_48-1;1;1-M3U15-0.093GF-Q0.7_01.15sec	GT37862_Hisp	3	#NUM!	-6.00779	93	1;1;1	#NUM!	#NUM!	U15
A06_RD14-0003-49_50_29-1;4;1-M3I15-0.186GF-Q0.9_01.15sec	GT37812_Hisp	3	#NUM!	-0.903204	186	1;4;1	#NUM!	#NUM!	I15
A06_RD14-0003-49_50_29-1;4;1-M3I15-0.186GF-Q0.9_01.15sec	OT07776_Cauc	3	#NUM!	-1.6308	186	1;4;1	#NUM!	#NUM!	I15
A07_RD14-0003-30_31_32-1;4;4-M3I15-0.567GF-Q1.1_01.15sec	C95C_Cauc	3	#NUM!	-11.2466	567	1;4;4	#NUM!	#NUM!	I15
A07_RD14-0003-30_31_32-1;4;4-M3I15-0.567GF-Q1.1_01.15sec	C97B_AA	3	#NUM!	-12.4634	567	1;4;4	#NUM!	#NUM!	I15
A07_RD14-0003-30_31_32-1;4;4-M3I15-0.567GF-Q1.1_01.15sec	PT84224_AA	3	#NUM!	-14.4776	567	1;4;4	#NUM!	#NUM!	I15
A07_RD14-0003-44_45_46-1;2;2-M2d-0.075GF-Q1.8_01.15sec	PT84195_AA	3	#NUM!	-1.64228	75	1;2;2	#NUM!	#NUM!	d
A07_RD14-0003-49_50_29-1;4;1-M1U105-0.186GF-Q0.6_01.15sec	C30A_Asian	3	#NUM!	-1.14941	186	1;4;1	#NUM!	#NUM!	U105
A07_RD14-0003-49_50_29-1;4;1-M1U105-0.186GF-Q0.6_01.15sec	C43B_AA	3	#NUM!	-1.83348	186	1;4;1	#NUM!	#NUM!	U105
A08_RD14-0003-47_48_49-1;9;9-M2a-0.5GF-Q0.7_01.15sec	C37A_Asian	3	#NUM!	-16.1792	500	1;9;9	#NUM!	#NUM!	a
A08_RD14-0003-47_48_49-1;9;9-M2a-0.5GF-Q0.7_01.15sec	MT94834_Cauc	3	#NUM!	-17.7587	500	1;9;9	#NUM!	#NUM!	a
A08_RD14-0003-47_48_49-1;9;9-M2a-0.5GF-Q0.7_01.15sec	MT97173_Cauc	3	#NUM!	-7.79816	500	1;9;9	#NUM!	#NUM!	a
A08_RD14-0003-49_50_29-1;4;1-M3a-0.186GF-Q0.5_01.15sec	C32C_Cauc	3	#NUM!	-0.32614	186	1;4;1	#NUM!	#NUM!	a
A08_RD14-0003-49_50_29-1;4;1-M3a-0.186GF-Q0.5_01.15sec	Y8_Cauc	3	#NUM!	-0.312702	186	1;4;1	#NUM!	#NUM!	a
A09_RD14-0003-47_48_49-1;9;9-M2d-0.5GF-Q1.4_01.15sec	ZT79321_AA	3	#NUM!	-6.26041	500	1;9;9	#NUM!	#NUM!	d
B01_RD14-0003-36_37_38-1;2;1-M2a-0.5GF-Q0.6_02.15sec	C49A_Asian	3	#NUM!	-13.7117	500	1;2;1	#NUM!	#NUM!	a
B01_RD14-0003-36_37_38-1;2;1-M2a-0.5GF-Q0.6_02.15sec	JT52346_Cauc	3	#NUM!	-14.7643	500	1;2;1	#NUM!	#NUM!	a
B01_RD14-0003-36_37_38-1;2;1-M2a-0.5GF-Q0.6_02.15sec	PT84183_AA	3	#NUM!	-9.26003	500	1;2;1	#NUM!	#NUM!	a
B02_RD14-0003-36_37_38-1;2;1-M2d-0.5GF-Q0.9_02.15sec	MT94817_Cauc	3	#NUM!	-6.15284	500	1;2;1	#NUM!	#NUM!	d
B02_RD14-0003-36_37_38-1;2;1-M2d-0.5GF-Q0.9_02.15sec	MT97177_Cauc	3	#NUM!	-5.72083	500	1;2;1	#NUM!	#NUM!	d
B02_RD14-0003-36_37_38-1;2;1-M2d-0.5GF-Q0.9_02.15sec	PT84228_AA	3	#NUM!	-6.29952	500	1;2;1	#NUM!	#NUM!	d
B05_RD14-0003-46_47_48-1;1;1-M4I22-0.093GF-Q1.4_02.15sec	PT83868_AA	3	#NUM!	-4.23482	93	1;1;1	#NUM!	#NUM!	I22
B06_RD14-0003-44_45_46-1;2;2-M2c-0.625GF-Q0.8_02.15sec	C51B_AA	3	#NUM!	-3.09738	625	1;2;2	#NUM!	#NUM!	c
B06_RD14-0003-44_45_46-1;2;2-M2c-0.625GF-Q0.8_02.15sec	C89A_Asian	3	#NUM!	-3.16683	625	1;2;2	#NUM!	#NUM!	c
B06_RD14-0003-44_45_46-1;2;2-M2c-0.625GF-Q0.8_02.15sec	Y21_Hisp	3	#NUM!	-3.09809	625	1;2;2	#NUM!	#NUM!	c
B06_RD14-0003-49_50_29-1;4;1-M2U15-0.378GF-Q0.9_02.15sec	JT51178_Cauc	3	#NUM!	-1.5991	378	1;4;1	#NUM!	#NUM!	U15
B06_RD14-0003-49_50_29-1;4;1-M2U15-0.378GF-Q0.9_02.15sec	JT51499_AA	3	#NUM!	-1.91195	378	1;4;1	#NUM!	#NUM!	U15
B06_RD14-0003-49_50_29-1;4;1-M2U15-0.378GF-Q0.9_02.15sec	MT94817_Cauc	3	#NUM!	-1.66964	378	1;4;1	#NUM!	#NUM!	U15
B07_RD14-0003-30_31_32-1;4;4-M3I15-0.279GF-Q1.1_02.15sec	MT94859_Cauc	3	#NUM!	-2.02514	279	1;4;4	#NUM!	#NUM!	I15
B07_RD14-0003-44_45_46-1;2;2-M1e-0.625GF-Q2.0_02.15sec	C77C_Cauc	3	#NUM!	-3.83795	625	1;2;2	#NUM!	#NUM!	e
B07_RD14-0003-44_45_46-1;2;2-M1e-0.625GF-Q2.0_02.15sec	JT51487_AA	3	#NUM!	-4.93851	625	1;2;2	#NUM!	#NUM!	e
B07_RD14-0003-44_45_46-1;2;2-M1e-0.625GF-Q2.0_02.15sec	PT84386_Hisp	3	#NUM!	-4.8813	625	1;2;2	#NUM!	#NUM!	e
B08_RD14-0003-30_31_32-1;4;4-M1U105-0.567GF-Q0.8_02.15sec	GC03394_Cauc	3	#NUM!	-18.4605	567	1;4;4	#NUM!	#NUM!	U105
B08_RD14-0003-30_31_32-1;4;4-M1U105-0.567GF-Q0.8_02.15sec	MT94839_Cauc	3	#NUM!	-29.0435	567	1;4;4	#NUM!	#NUM!	U105
B08_RD14-0003-30_31_32-1;4;4-M1U105-0.567GF-Q0.8_02.15sec	PT83505_Cauc	3	#NUM!	-28.0791	567	1;4;4	#NUM!	#NUM!	U105
C01_RD14-0003-36_37_38-1;2;1-M2a-0.252GF-Q0.6_03.15sec	C89A_Asian	3	#NUM!	-9.2351	252	1;2;1	#NUM!	#NUM!	a
C01_RD14-0003-36_37_38-1;2;1-M2a-0.252GF-Q0.6_03.15sec	TT50913_AA	3	#NUM!	-7.31348	252	1;2;1	#NUM!	#NUM!	a
C01_RD14-0003-36_37_38-1;2;1-M2a-0.252GF-Q0.6_03.15sec	ZT80656_Hisp	3	#NUM!	-8.05862	252	1;2;1	#NUM!	#NUM!	a
C02_RD14-0003-36_37_38-1;2;1-M2d-0.252GF-Q0.9_03.15sec	C89C_Cauc	3	#NUM!	-7.64951	252	1;2;1	#NUM!	#NUM!	d
C02_RD14-0003-36_37_38-1;2;1-M2d-0.252GF-Q0.9_03.15sec	MT95357_AA	3	#NUM!	-3.27271	252	1;2;1	#NUM!	#NUM!	d
C03_RD14-0003-41_42_43-1;9;1-M2a-0.693GF-Q0.6_03.15sec	C02A_Asian	3	#NUM!	-14.9792	693	1;9;1	#NUM!	#NUM!	a
C03_RD14-0003-41_42_43-1;9;1-M2a-0.693GF-Q0.6_03.15sec	C35C_Cauc	3	#NUM!	-4.92512	693	1;9;1	#NUM!	#NUM!	a
C03_RD14-0003-41_42_43-1;9;1-M2a-0.693GF-Q0.6_03.15sec	C76B_AA	3	#NUM!	-14.3426	693	1;9;1	#NUM!	#NUM!	a
C03_RD14-0003-49_50_29-1;4;1-M1S30-0.75GF-Q2.8_03.15sec	C13B_AA	3	#NUM!	-4.52644	750	1;4;1	#NUM!	#NUM!	S30
C03_RD14-0003-49_50_29-1;4;1-M1S30-0.75GF-Q2.8_03.15sec	C76B_AA	3	#NUM!	-5.13904	750	1;4;1	#NUM!	#NUM!	S30
C03_RD14-0003-49_50_29-1;4;1-M1S30-0.75GF-Q2.8_03.15sec	MT97180_Cauc	3	#NUM!	-6.25621	750	1;4;1	#NUM!	#NUM!	S30
C04_RD14-0003-41_42_43-1;9;1-M1d-0.693GF-Q1.0_03.15sec	C18A_Asian	3	#NUM!	-0.879113	693	1;9;1	#NUM!	#NUM!	d
C04_RD14-0003-41_42_43-1;9;1-M1d-0.693GF-Q1.0_03.15sec	Y26_Hisp	3	#NUM!	-2.96096	693	1;9;1	#NUM!	#NUM!	d
C04_RD14-0003-41_42_43-1;9;1-M1d-0.693GF-Q1.0_03.15sec	ZT80384_Hisp	3	#NUM!	-2.96637	693	1;9;1	#NUM!	#NUM!	d
C06_RD14-0003-44_45_46-1;2;2-M2c-0.315GF-Q0.8_03.15sec	C36C_Cauc	3	#NUM!	0.20122	315	1;2;2	#NUM!	#NUM!	c
C06_RD14-0003-44_45_46-1;2;2-M2c-0.315GF-Q0.8_03.15sec	GT36884_Cauc	3	#NUM!	-1.98531	315	1;2;2	#NUM!	#NUM!	c
C06_RD14-0003-44_45_46-1;2;2-M2c-0.315GF-Q0.8_03.15sec	JT51331_AA	3	#NUM!	-3.17855	315	1;2;2	#NUM!	#NUM!	c
C06_RD14-0003-46_47_48-1;1;1-M3a-0.189GF-Q0.5_03.15sec	JT51462_AA	3	#NUM!	-5.08087	189	1;1;1	#NUM!	#NUM!	a
C06_RD14-0003-46_47_48-1;1;1-M3a-0.189GF-Q0.5_03.15sec	JT51476_AA	3	#NUM!	-6.97649	189	1;1;1	#NUM!	#NUM!	a
C06_RD14-0003-46_47_48-1;1;1-M3a-0.189GF-Q0.5_03.15sec	ZT79340_AA	3	#NUM!	-7.02375	189	1;1;1	#NUM!	#NUM!	a
C06_RD14-0003-49_50_29-1;4;1-M4I22-0.378GF-Q2.1_03.15sec	MT97176_Cauc	3	#NUM!	-0.479892	378	1;4;1	#NUM!	#NUM!	I22
C06_RD14-0003-49_50_29-1;4;1-M4I22-0.378GF-Q2.1_03.15sec	Y30_Hisp	3	#NUM!	-0.516497	378	1;4;1	#NUM!	#NUM!	I22
C06_RD14-0003-49_50_29-1;4;1-M4I22-0.378GF-Q2.1_03.15sec	Y7_Cauc	3	#NUM!	-0.902013	378	1;4;1	#NUM!	#NUM!	I22
C07_RD14-0003-30_31_32-1;4;4-M1U15-0.567GF-Q0.7_03.15sec	C27H_Hisp	3	#NUM!	-12.3498	567	1;4;4	#NUM!	#NUM!	U15
C07_RD14-0003-30_31_32-1;4;4-M1U15-0.567GF-Q0.7_03.15sec	C64B_AA	3	#NUM!	-17.7316	567	1;4;4	#NUM!	#NUM!	U15
C07_RD14-0003-30_31_32-1;4;4-M1U15-0.567GF-Q0.7_03.15sec	GT37019_AA	3	#NUM!	-15.6333	567	1;4;4	#NUM!	#NUM!	U15
C07_RD14-0003-46_47_48-1;1;1-M2e-0.189GF-Q1.0_03.15sec	ZT79321_AA	3	#NUM!	-6.64094	189	1;1;1	#NUM!	#NUM!	e
C07_RD14-0003-46_47_48-1;1;1-M2e-0.189GF-Q1.0_03.15sec	ZT80658_Hisp	3	#NUM!	-5.33957	189	1;1;1	#NUM!	#NUM!	e
C08_RD14-0003-47_48_49-1;9;9-M2c-0.75GF-Q1.1_03.15sec	WT51503_AA	3	#NUM!	-6.05429	750	1;9;9	#NUM!	#NUM!	c
C08_RD14-0003-47_48_49-1;9;9-M2c-0.75GF-Q1.1_03.15sec	ZT80634_Hisp	3	#NUM!	-6.73913	750	1;9;9	#NUM!	#NUM!	c
C08_RD14-0003-47_48_49-1;9;9-M2c-0.75GF-Q1.1_03.15sec	ZT80984_Hisp	3	#NUM!	-5.66887	750	1;9;9	#NUM!	#NUM!	c
C09_RD14-0003-47_48_49-1;9;9-M1e-0.75GF-Q2.2_03.15sec	C64H_Hisp	3	#NUM!	-7.86093	750	1;9;9	#NUM!	#NUM!	e
D01_RD14-0003-36_37_38-1;2;1-M3a-0.124GF-Q0.7_04.15sec	MT97200_Cauc	3	#NUM!	-5.06733	124	1;2;1	#NUM!	#NUM!	a
D01_RD14-0003-36_37_38-1;2;1-M3a-0.124GF-Q0.7_04.15sec	Y33_AA	3	#NUM!	-4.81712	124	1;2;1	#NUM!	#NUM!	a
D03_RD14-0003-41_42_43-1;9;1-M2a-0.5GF-Q0.6_04.15sec	C14H_Hisp	3	#NUM!	-7.4218	500	1;9;1	#NUM!	#NUM!	a
D03_RD14-0003-41_42_43-1;9;1-M2a-0.5GF-Q0.6_04.15sec	MT94834_Cauc	3	#NUM!	-1.83981	500	1;9;1	#NUM!	#NUM!	a
D03_RD14-0003-41_42_43-1;9;1-M2a-0.5GF-Q0.6_04.15sec	PT84236_AA	3	#NUM!	-1.50788	500	1;9;1	#NUM!	#NUM!	a
D03_RD14-0003-49_50_29-1;4;1-M1S30-0.378GF-Q2.8_04.15sec	PT83916_AA	3	#NUM!	-4.12844	378	1;4;1	#NUM!	#NUM!	S30
D03_RD14-0003-49_50_29-1;4;1-M1S30-0.378GF-Q2.8_04.15sec	WT51507_AA	3	#NUM!	-4.21632	378	1;4;1	#NUM!	#NUM!	S30
D05_RD14-0003-46_47_48-1;1;1-M2U60-0.189GF-Q2.5_04.15sec	GC03394_Cauc	3	#NUM!	-6.12249	189	1;1;1	#NUM!	#NUM!	U60
D05_RD14-0003-46_47_48-1;1;1-M2U60-0.189GF-Q2.5_04.15sec	UA16895_Cauc	3	#NUM!	-5.05477	189	1;1;1	#NUM!	#NUM!	U60
D05_RD14-0003-46_47_48-1;1;1-M2U60-0.189GF-Q2.5_04.15sec	Y3_Cauc	3	#NUM!	-2.43435	189	1;1;1	#NUM!	#NUM!	U60
D06_RD14-0003-44_45_46-1;2;2-M3c-0.155GF-Q0.9_04.15sec	PT83909_AA	3	#NUM!	-1.6493	155	1;2;2	#NUM!	#NUM!	c
D06_RD14-0003-46_47_48-1;1;1-M3a-0.093GF-Q0.5_04.15sec	MT94868_Cauc	3	#NUM!	-3.40377	93	1;1;1	#NUM!	#NUM!	a
D06_RD14-0003-46_47_48-1;1;1-M3a-0.093GF-Q0.5_04.15sec	MT95124_AA	3	#NUM!	-6.35152	93	1;1;1	#NUM!	#NUM!	a
D06_RD14-0003-49_50_29-1;4;1-M3U15-0.09GF-Q1.0_04.15sec	JT51465_AA	3	#NUM!	-1.25411	90	1;4;1	#NUM!	#NUM!	U15
D08_RD14-0003-47_48_49-1;9;9-M2c-0.589GF-Q1.1_04.15sec	C63B_AA	3	#NUM!	-3.04176	589	1;9;9	#NUM!	#NUM!	c
D08_RD14-0003-47_48_49-1;9;9-M2c-0.589GF-Q1.1_04.15sec	GT38075_Cauc	3	#NUM!	-4.47056	589	1;9;9	#NUM!	#NUM!	c
D08_RD14-0003-47_48_49-1;9;9-M2c-0.589GF-Q1.1_04.15sec	UA16899_Cauc	3	#NUM!	-4.46362	589	1;9;9	#NUM!	#NUM!	c
D09_RD14-0003-30_31_32-1;4;4-M2a-0.567GF-Q0.6_04.15sec	PT83978_AA	3	#NUM!	-22.6356	567	1;4;4	#NUM!	#NUM!	a
D09_RD14-0003-30_31_32-1;4;4-M2a-0.567GF-Q0.6_04.15sec	ZT79336_AA	3	#NUM!	-19.5879	567	1;4;4	#NUM!	#NUM!	a
D09_RD14-0003-30_31_32-1;4;4-M2a-0.567GF-Q0.6_04.15sec	ZT80658_Hisp	3	#NUM!	-20.1622	567	1;4;4	#NUM!	#NUM!	a
E01_RD14-0003-36_37_38-1;2;1-M3a-0.06GF-Q0.7_05.15sec	C28H_Hisp	3	#NUM!	-4.8008	60	1;2;1	#NUM!	#NUM!	a
E01_RD14-0003-36_37_38-1;2;1-M3a-0.06GF-Q0.7_05.15sec	PT83899_AA	3	#NUM!	-4.83674	60	1;2;1	#NUM!	#NUM!	a
E01_RD14-0003-36_37_38-1;2;1-M3a-0.06GF-Q0.7_05.15sec	PT84184_AA	3	#NUM!	-3.61904	60	1;2;1	#NUM!	#NUM!	a
E03_RD14-0003-41_42_43-1;9;1-M2a-0.341GF-Q0.6_05.15sec	C01Ba_AA	3	#NUM!	-8.35024	341	1;9;1	#NUM!	#NUM!	a
E03_RD14-0003-41_42_43-1;9;1-M2a-0.341GF-Q0.6_05.15sec	C44A_Asian	3	#NUM!	-4.41804	341	1;9;1	#NUM!	#NUM!	a
E03_RD14-0003-41_42_43-1;9;1-M2a-0.341GF-Q0.6_05.15sec	MT97186_Cauc	3	#NUM!	-8.28175	341	1;9;1	#NUM!	#NUM!	a
E05_RD14-0003-46_47_48-1;1;1-M3I35-0.189GF-QLAND_05.15sec	C28B_AA	3	#NUM!	-6.36709	189	1;1;1	#NUM!	#NUM!	I35
E05_RD14-0003-46_47_48-1;1;1-M3I35-0.189GF-QLAND_05.15sec	ZT80786_Hisp	3	#NUM!	-11.0019	189	1;1;1	#NUM!	#NUM!	I35
E06_RD14-0003-46_47_48-1;1;1-M4a-0.045GF-Q0.3_05.15sec	PT84213_AA	3	#NUM!	-1.96263	45	1;1;1	#NUM!	#NUM!	a
E06_RD14-0003-49_50_29-1;4;1-M1U60-0.378GF-Q0.6_05.15sec	C49A_Asian	3	#NUM!	-8.33927	378	1;4;1	#NUM!	#NUM!	U60
E06_RD14-0003-49_50_29-1;4;1-M1U60-0.378GF-Q0.6_05.15sec	MT94835_Cauc	3	#NUM!	-7.85309	378	1;4;1	#NUM!	#NUM!	U60
E06_RD14-0003-49_50_29-1;4;1-M1U60-0.378GF-Q0.6_05.15sec	OT05560_AA	3	#NUM!	-7.81162	378	1;4;1	#NUM!	#NUM!	U60
E07_RD14-0003-30_31_32-1;4;4-M2I22-0.567GF-Q1.7_05.15sec	GT37420_Hisp	3	#NUM!	-14.4217	567	1;4;4	#NUM!	#NUM!	I22
E07_RD14-0003-30_31_32-1;4;4-M2I22-0.567GF-Q1.7_05.15sec	GT38100_Cauc	3	#NUM!	-10.3145	567	1;4;4	#NUM!	#NUM!	I22
E07_RD14-0003-30_31_32-1;4;4-M2I22-0.567GF-Q1.7_05.15sec	JT51482_AA	3	#NUM!	-9.58802	567	1;4;4	#NUM!	#NUM!	I22
E07_RD14-0003-30_31_32-1;4;4-M2U15-0.279GF-Q1.0_05.15sec	MT94818_Cauc	3	#NUM!	-14.4242	279	1;4;4	#NUM!	#NUM!	U15
E07_RD14-0003-30_31_32-1;4;4-M2U15-0.279GF-Q1.0_05.15sec	MT94831_Cauc	3	#NUM!	-10.9168	279	1;4;4	#NUM!	#NUM!	U15
E07_RD14-0003-30_31_32-1;4;4-M2U15-0.279GF-Q1.0_05.15sec	ZT79341_AA	3	#NUM!	-11.4004	279	1;4;4	#NUM!	#NUM!	U15
E08_RD14-0003-47_48_49-1;9;9-M2c-0.5GF-Q1.1_05.15sec	C12B_AA	3	#NUM!	-11.4466	500	1;9;9	#NUM!	#NUM!	c
E08_RD14-0003-47_48_49-1;9;9-M2c-0.5GF-Q1.1_05.15sec	MT94848_Cauc	3	#NUM!	-12.331	500	1;9;9	#NUM!	#NUM!	c
E10_RD14-0003-30_31_32-1;4;4-M2e-0.567GF-Q1.0_05.15sec	C81A_Asian	3	#NUM!	-3.54931	567	1;4;4	#NUM!	#NUM!	e
F01_RD14-0003-36_37_38-1;2;1-M2c-0.5GF-Q0.6_06.15sec	C80A_Asian	3	#NUM!	-5.71317	500	1;2;1	#NUM!	#NUM!	c
F01_RD14-0003-36_37_38-1;2;1-M2c-0.5GF-Q0.6_06.15sec	OT07767_Cauc	3	#NUM!	-7.32518	500	1;2;1	#NUM!	#NUM!	c
F01_RD14-0003-36_37_38-1;2;1-M2c-0.5GF-Q0.6_06.15sec	PT84227_AA	3	#NUM!	-6.95102	500	1;2;1	#NUM!	#NUM!	c
F02_RD14-0003-36_37_38-1;2;1-M2e-0.5GF-Q0.9_06.15sec	C30B_AA	3	#NUM!	-6.04285	500	1;2;1	#NUM!	#NUM!	e
F02_RD14-0003-36_37_38-1;2;1-M2e-0.5GF-Q0.9_06.15sec	C50A_Asian	3	#NUM!	-4.29885	500	1;2;1	#NUM!	#NUM!	e
F02_RD14-0003-46_47_48-1;1;1-M2S10-0.375GF-Q1.2_06.15sec	C34A_Asian	3	#NUM!	-14.3672	375	1;1;1	#NUM!	#NUM!	S10
F02_RD14-0003-46_47_48-1;1;1-M2S10-0.375GF-Q1.2_06.15sec	C62C_Cauc	3	#NUM!	-13.183	375	1;1;1	#NUM!	#NUM!	S10
F02_RD14-0003-46_47_48-1;1;1-M2S10-0.375GF-Q1.2_06.15sec	PT83893_AA	3	#NUM!	-12.0583	375	1;1;1	#NUM!	#NUM!	S10
F03_RD14-0003-41_42_43-1;9;1-M2a-0.165GF-Q0.6_06.15sec	C53A_Asian	3	#NUM!	-2.47196	165	1;9;1	#NUM!	#NUM!	a
F03_RD14-0003-41_42_43-1;9;1-M2a-0.165GF-Q0.6_06.15sec	C81B_AA	3	#NUM!	-2.48911	165	1;9;1	#NUM!	#NUM!	a
F04_RD14-0003-46_47_48-1;1;1-M3I15-0.189GF-Q0.8_06.15sec	GT37542_Hisp	3	#NUM!	-8.95395	189	1;1;1	#NUM!	#NUM!	I15
F04_RD14-0003-46_47_48-1;1;1-M3I15-0.189GF-Q0.8_06.15sec	TT50701_Cauc	3	#NUM!	-6.47066	189	1;1;1	#NUM!	#NUM!	I15
F04_RD14-0003-46_47_48-1;1;1-M3I15-0.189GF-Q0.8_06.15sec	ZT79620_AA	3	#NUM!	-6.67788	189	1;1;1	#NUM!	#NUM!	I15
F05_RD14-0003-44_45_46-1;2;2-M2a-0.625GF-Q0.6_06.15sec	GT38089_Cauc	3	#NUM!	-2.22605	625	1;2;2	#NUM!	#NUM!	a
F05_RD14-0003-44_45_46-1;2;2-M2a-0.625GF-Q0.6_06.15sec	MT97176_Cauc	3	#NUM!	-2.64405	625	1;2;2	#NUM!	#NUM!	a
F05_RD14-0003-44_45_46-1;2;2-M2a-0.625GF-Q0.6_06.15sec	PT83868_AA	3	#NUM!	-1.92149	625	1;2;2	#NUM!	#NUM!	a
F05_RD14-0003-46_47_48-1;1;1-M4I35-0.093GF-QLAND_06.15sec	C48B_AA	3	#NUM!	-4.1185	93	1;1;1	#NUM!	#NUM!	I35
F06_RD14-0003-44_45_46-1;2;2-M2d-0.625GF-Q1.8_06.15sec	JT51468_AA	3	#NUM!	-3.22028	625	1;2;2	#NUM!	#NUM!	d
F06_RD14-0003-44_45_46-1;2;2-M2d-0.625GF-Q1.8_06.15sec	PT83535_Cauc	3	#NUM!	-2.81244	625	1;2;2	#NUM!	#NUM!	d
F06_RD14-0003-44_45_46-1;2;2-M2d-0.625GF-Q1.8_06.15sec	PT84228_AA	3	#NUM!	-1.70041	625	1;2;2	#NUM!	#NUM!	d
F06_RD14-0003-49_50_29-1;4;1-M4I35-0.378GF-QLAND_06.15sec	UT58295_Cauc	3	#NUM!	-0.907148	378	1;4;1	#NUM!	#NUM!	I35
F07_RD14-0003-30_31_32-1;4;4-M2U15-0.135GF-Q1.0_06.15sec	C48C_Cauc	3	#NUM!	-3.81253	135	1;4;4	#NUM!	#NUM!	U15
F07_RD14-0003-30_31_32-1;4;4-M4I22-0.279GF-Q4.7_06.15sec	PT84236_AA	3	#NUM!	-3.91137	279	1;4;4	#NUM!	#NUM!	I22
F08_RD14-0003-47_48_49-1;9;9-M2c-0.285GF-Q1.1_06.15sec	C65H_Hisp	3	#NUM!	-0.131318	285	1;9;9	#NUM!	#NUM!	c
F08_RD14-0003-47_48_49-1;9;9-M2c-0.285GF-Q1.1_06.15sec	MT97184_Cauc	3	#NUM!	-4.14482	285	1;9;9	#NUM!	#NUM!	c
F09_RD14-0003-30_31_32-1;4;4-M2a-0.279GF-Q0.6_06.15sec	PT83905_AA	3	#NUM!	-12.1206	279	1;4;4	#NUM!	#NUM!	a
F09_RD14-0003-30_31_32-1;4;4-M2a-0.279GF-Q0.6_06.15sec	ZT79620_AA	3	#NUM!	-10.4662	279	1;4;4	#NUM!	#NUM!	a
F09_RD14-0003-47_48_49-1;9;9-M2e-0.5GF-Q1.5_06.15sec	GT36877_Cauc	3	#NUM!	-2.36722	500	1;9;9	#NUM!	#NUM!	e
G01_RD14-0003-36_37_38-1;2;1-M2c-0.252GF-Q0.6_07.15sec	C46C_Cauc	3	#NUM!	-8.08167	252	1;2;1	#NUM!	#NUM!	c
G01_RD14-0003-36_37_38-1;2;1-M2c-0.252GF-Q0.6_07.15sec	MT94850_Cauc	3	#NUM!	-8.10785	252	1;2;1	#NUM!	#NUM!	c
G01_RD14-0003-36_37_38-1;2;1-M2c-0.252GF-Q0.6_07.15sec	OT05600_AA	3	#NUM!	-5.44562	252	1;2;1	#NUM!	#NUM!	c
G02_RD14-0003-36_37_38-1;2;1-M2e-0.252GF-Q0.9_07.15sec	PT83886_AA	3	#NUM!	-5.08011	252	1;2;1	#NUM!	#NUM!	e
G02_RD14-0003-36_37_38-1;2;1-M2e-0.252GF-Q0.9_07.15sec	PT83891_AA	3	#NUM!	-3.5756	252	1;2;1	#NUM!	#NUM!	e
G02_RD14-0003-46_47_48-1;1;1-M2S10-0.189GF-Q1.2_07.15sec	C93C_Cauc	3	#NUM!	-5.70387	189	1;1;1	#NUM!	#NUM!	S10
G02_RD14-0003-46_47_48-1;1;1-M2S10-0.189GF-Q1.2_07.15sec	JT51496_AA	3	#NUM!	-5.67872	189	1;1;1	#NUM!	#NUM!	S10
G02_RD14-0003-46_47_48-1;1;1-M2S10-0.189GF-Q1.2_07.15sec	UT58310_Cauc	3	#NUM!	-6.84743	189	1;1;1	#NUM!	#NUM!	S10
G03_RD14-0003-30_31_32-1;4;4-M1S30-0.75GF-Q3.2_07.15sec	MT95124_AA	3	#NUM!	-9.87053	750	1;4;4	#NUM!	#NUM!	S30
G03_RD14-0003-30_31_32-1;4;4-M1S30-0.75GF-Q3.2_07.15sec	TT51677_Cauc	3	#NUM!	-11.6284	750	1;4;4	#NUM!	#NUM!	S30
G03_RD14-0003-30_31_32-1;4;4-M1S30-0.75GF-Q3.2_07.15sec	ZA08588_Hisp	3	#NUM!	-11.9432	750	1;4;4	#NUM!	#NUM!	S30
G03_RD14-0003-41_42_43-1;9;1-M2c-0.693GF-Q1.1_07.15sec	C73B_AA	3	#NUM!	-1.19005	693	1;9;1	#NUM!	#NUM!	c
G04_RD14-0003-41_42_43-1;9;1-M1e-0.693GF-Q1.4_07.15sec	C07H_Hisp	3	#NUM!	-3.20403	693	1;9;1	#NUM!	#NUM!	e
G04_RD14-0003-41_42_43-1;9;1-M1e-0.693GF-Q1.4_07.15sec	C72C_Cauc	3	#NUM!	-0.537353	693	1;9;1	#NUM!	#NUM!	e
G04_RD14-0003-46_47_48-1;1;1-M3I15-0.093GF-Q0.8_07.15sec	MT94875_Cauc	3	#NUM!	-3.54924	93	1;1;1	#NUM!	#NUM!	I15
G04_RD14-0003-46_47_48-1;1;1-M3I15-0.093GF-Q0.8_07.15sec	PT83907_AA	3	#NUM!	-4.01807	93	1;1;1	#NUM!	#NUM!	I15
G05_RD14-0003-44_45_46-1;2;2-M2a-0.315GF-Q0.6_07.15sec	C30B_AA	3	#NUM!	-3.41823	315	1;2;2	#NUM!	#NUM!	a
G05_RD14-0003-44_45_46-1;2;2-M2a-0.315GF-Q0.6_07.15sec	JT51465_AA	3	#NUM!	-3.43355	315	1;2;2	#NUM!	#NUM!	a
G05_RD14-0003-44_45_46-1;2;2-M2a-0.315GF-Q0.6_07.15sec	UA16899_Cauc	3	#NUM!	-3.32789	315	1;2;2	#NUM!	#NUM!	a
G05_RD14-0003-46_47_48-1;1;1-M2U105-0.189GF-Q4.6_07.15sec	GT38094_Cauc	3	#NUM!	-5.4683	189	1;1;1	#NUM!	#NUM!	U105
G05_RD14-0003-46_47_48-1;1;1-M2U105-0.189GF-Q4.6_07.15sec	MT94866_Cauc	3	#NUM!	-5.61449	189	1;1;1	#NUM!	#NUM!	U105
G05_RD14-0003-46_47_48-1;1;1-M2U105-0.189GF-Q4.6_07.15sec	PT84189_AA	3	#NUM!	-5.66091	189	1;1;1	#NUM!	#NUM!	U105
G05_RD14-0003-46_47_48-1;1;1-M4I35-0.045GF-QLAND_07.15sec	OT05591_AA	3	#NUM!	-0.389636	45	1;1;1	#NUM!	#NUM!	I35
G06_RD14-0003-44_45_46-1;2;2-M2d-0.315GF-Q1.8_07.15sec	C62H_Hisp	3	#NUM!	-2.84754	315	1;2;2	#NUM!	#NUM!	d
G06_RD14-0003-44_45_46-1;2;2-M2d-0.315GF-Q1.8_07.15sec	MT97187_Cauc	3	#NUM!	-2.6551	315	1;2;2	#NUM!	#NUM!	d
G06_RD14-0003-49_50_29-1;4;1-M4I35-0.186GF-QLAND_07.15sec	WT52480_Cauc	3	#NUM!	-0.221076	186	1;4;1	#NUM!	#NUM!	I35
G07_RD14-0003-30_31_32-1;4;4-M1U60-0.567GF-Q0.8_07.15sec	OT05896_AA	3	#NUM!	-13.367	567	1;4;4	#NUM!	#NUM!	U60
G07_RD14-0003-30_31_32-1;4;4-M1U60-0.567GF-Q0.8_07.15sec	WT51343_Cauc	3	#NUM!	-13.967	567	1;4;4	#NUM!	#NUM!	U60
G07_RD14-0003-30_31_32-1;4;4-M1U60-0.567GF-Q0.8_07.15sec	WT52457_Cauc	3	#NUM!	-7.67282	567	1;4;4	#NUM!	#NUM!	U60
G07_RD14-0003-47_48_49-1;9;9-M2a-0.75GF-Q0.7_07.15sec	C09B_AA	3	#NUM!	-12.4504	750	1;9;9	#NUM!	#NUM!	a
G07_RD14-0003-47_48_49-1;9;9-M2a-0.75GF-Q0.7_07.15sec	GT37349_Hisp	3	#NUM!	-12.975	750	1;9;9	#NUM!	#NUM!	a
G07_RD14-0003-47_48_49-1;9;9-M2a-0.75GF-Q0.7_07.15sec	ZT80815_Hisp	3	#NUM!	-13.219	750	1;9;9	#NUM!	#NUM!	a
G08_RD14-0003-47_48_49-1;9;9-M2d-0.75GF-Q1.4_07.15sec	C46B_AA	3	#NUM!	-3.81536	750	1;9;9	#NUM!	#NUM!	d
G09_RD14-0003-30_31_32-1;4;4-M3a-0.135GF-Q0.5_07.15sec	C06H_Hisp	3	#NUM!	-1.77635	135	1;4;4	#NUM!	#NUM!	a
H02_RD14-0003-46_47_48-1;1;1-M3S10-0.093GF-Q1.4_08.15sec	OT05562_AA	3	#NUM!	-1.09589	93	1;1;1	#NUM!	#NUM!	S10
H03_RD14-0003-30_31_32-1;4;4-M1S30-0.567GF-Q3.2_08.15sec	C63H_Hisp	3	#NUM!	-12.3471	567	1;4;4	#NUM!	#NUM!	S30
H03_RD14-0003-30_31_32-1;4;4-M1S30-0.567GF-Q3.2_08.15sec	C86C_Cauc	3	#NUM!	-12.9669	567	1;4;4	#NUM!	#NUM!	S30
H03_RD14-0003-30_31_32-1;4;4-M1S30-0.567GF-Q3.2_08.15sec	MT95104_AA	3	#NUM!	-10.7873	567	1;4;4	#NUM!	#NUM!	S30
H03_RD14-0003-41_42_43-1;9;1-M2c-0.5GF-Q1.1_08.15sec	MT95102_AA	3	#NUM!	-2.27483	500	1;9;1	#NUM!	#NUM!	c
H04_RD14-0003-46_47_48-1;1;1-M2U15-0.189GF-Q0.8_08.15sec	C18A_Asian	3	#NUM!	-7.59732	189	1;1;1	#NUM!	#NUM!	U15
H04_RD14-0003-46_47_48-1;1;1-M2U15-0.189GF-Q0.8_08.15sec	C95B_AA	3	#NUM!	-8.09004	189	1;1;1	#NUM!	#NUM!	U15
H04_RD14-0003-46_47_48-1;1;1-M2U15-0.189GF-Q0.8_08.15sec	ZT80028_Hisp	3	#NUM!	-7.30061	189	1;1;1	#NUM!	#NUM!	U15
H05_RD14-0003-44_45_46-1;2;2-M3a-0.155GF-Q0.6_08.15sec	C26H_Hisp	3	#NUM!	-0.798788	155	1;2;2	#NUM!	#NUM!	a
H05_RD14-0003-44_45_46-1;2;2-M3a-0.155GF-Q0.6_08.15sec	C75C_Cauc	3	#NUM!	-0.797379	155	1;2;2	#NUM!	#NUM!	a
H05_RD14-0003-44_45_46-1;2;2-M3a-0.155GF-Q0.6_08.15sec	GT36864_Cauc	3	#NUM!	-0.711073	155	1;2;2	#NUM!	#NUM!	a
H05_RD14-0003-49_50_29-1;4;1-M3I15-0.378GF-Q0.9_08.15sec	C30B_AA	3	#NUM!	-3.31636	378	1;4;1	#NUM!	#NUM!	I15
H05_RD14-0003-49_50_29-1;4;1-M3I15-0.378GF-Q0.9_08.15sec	C64B_AA	3	#NUM!	-3.66882	378	1;4;1	#NUM!	#NUM!	I15
H05_RD14-0003-49_50_29-1;4;1-M3I15-0.378GF-Q0.9_08.15sec	PT83898_AA	3	#NUM!	-2.68215	378	1;4;1	#NUM!	#NUM!	I15
H06_RD14-0003-49_50_29-1;4;1-M1U105-0.378GF-Q0.6_08.15sec	JT51493_AA	3	#NUM!	-6.27529	378	1;4;1	#NUM!	#NUM!	U105
H06_RD14-0003-49_50_29-1;4;1-M1U105-0.378GF-Q0.6_08.15sec	MT95085_AA	3	#NUM!	-4.81574	378	1;4;1	#NUM!	#NUM!	U105
H06_RD14-0003-49_50_29-1;4;1-M1U105-0.378GF-Q0.6_08.15sec	ZT80658_Hisp	3	#NUM!	-6.22542	378	1;4;1	#NUM!	#NUM!	U105
H07_RD14-0003-30_31_32-1;4;4-M1U60-0.279GF-Q0.8_08.15sec	C82C_Cauc	3	#NUM!	-5.43224	279	1;4;4	#NUM!	#NUM!	U60
H07_RD14-0003-30_31_32-1;4;4-M1U60-0.279GF-Q0.8_08.15sec	PT83898_AA	3	#NUM!	-7.74517	279	1;4;4	#NUM!	#NUM!	U60
H07_RD14-0003-30_31_32-1;4;4-M3I35-0.567GF-QLAND_08.15sec	C04Ba_AA	3	#NUM!	-14.8657	567	1;4;4	#NUM!	#NUM!	I35
H07_RD14-0003-30_31_32-1;4;4-M3I35-0.567GF-QLAND_08.15sec	JT51471_AA	3	#NUM!	-13.493	567	1;4;4	#NUM!	#NUM!	I35
H07_RD14-0003-30_31_32-1;4;4-M3I35-0.567GF-QLAND_08.15sec	Y8_Cauc	3	#NUM!	-16.4256	567	1;4;4	#NUM!	#NUM!	I35
H07_RD14-0003-47_48_49-1;9;9-M2a-0.589GF-Q0.7_08.15sec	PT83893_AA	3	#NUM!	-17.1178	589	1;9;9	#NUM!	#NUM!	a
H07_RD14-0003-47_48_49-1;9;9-M2a-0.589GF-Q0.7_08.15sec	PT83895_AA	3	#NUM!	-17.4897	589	1;9;9	#NUM!	#NUM!	a
H07_RD14-0003-47_48_49-1;9;9-M2a-0.589GF-Q0.7_08.15sec	WT52486_Cauc	3	#NUM!	-25.2887	589	1;9;9	#NUM!	#NUM!	a
H07_RD14-0003-49_50_29-1;4;1-M3a-0.378GF-Q0.5_08.15sec	C18A_Asian	3	#NUM!	-3.9203	378	1;4;1	#NUM!	#NUM!	a
H07_RD14-0003-49_50_29-1;4;1-M3a-0.378GF-Q0.5_08.15sec	C38A_Asian	3	#NUM!	-4.58921	378	1;4;1	#NUM!	#NUM!	a
H07_RD14-0003-49_50_29-1;4;1-M3a-0.378GF-Q0.5_08.15sec	JT51462_AA	3	#NUM!	-3.70527	378	1;4;1	#NUM!	#NUM!	a
A03_RD14-0003-44_45_46_47-1;1;4;1-M3I35-0.441GF-QLAND_01.15sec	UT57283_Cauc	4	#NUM!	2.25329e-05	441	1;1;4;1	#NUM!	#NUM!	I35
A04_RD14-0003-48_49_50_29-1;4;4;4-M3I22-0.403GF-Q1.7_01.15sec	UT58310_Cauc	4	#NUM!	0.000720426	403	1;4;4;4	#NUM!	#NUM!	I22
A07_RD14-0003-33_34_35_36-1;4;4;1-M1e-0.63GF-Q1.2_01.15sec	C82H_Hisp	4	#NUM!	-1.80676	630	1;4;4;1	#NUM!	#NUM!	e
A10_RD14-0003-48_49_50_29-1;4;4;4-M2a-0.5GF-Q0.4_01.15sec	C53H_Hisp	4	#NUM!	-2.33638	500	1;4;4;4	#NUM!	#NUM!	a
A10_RD14-0003-48_49_50_29-1;4;4;4-M2a-0.5GF-Q0.4_01.15sec	GT37900_Hisp	4	#NUM!	-5.134	500	1;4;4;4	#NUM!	#NUM!	a
A10_RD14-0003-48_49_50_29-1;4;4;4-M2a-0.5GF-Q0.4_01.15sec	WT52490_Cauc	4	#NUM!	-5.00862	500	1;4;4;4	#NUM!	#NUM!	a
A10_RD14-0003-48_49_50_29-1;4;4;4-M2a-0.5GF-Q0.4_01.15sec	ZT79319_AA	4	#NUM!	-5.02714	500	1;4;4;4	#NUM!	#NUM!	a
B07_RD14-0003-33_34_35_36-1;4;4;1-M1e-0.31GF-Q1.2_02.15sec	GT37864_Hisp	4	#NUM!	-0.902312	310	1;4;4;1	#NUM!	#NUM!	e
C01_RD14-0003-50_29_30_31-1;1;2;1-M2a-0.315GF-Q0.5_03.15sec	GT37765_Hisp	4	#NUM!	-5.30692	315	1;1;2;1	#NUM!	#NUM!	a
C01_RD14-0003-50_29_30_31-1;1;2;1-M2a-0.315GF-Q0.5_03.15sec	PT83916_AA	4	#NUM!	-3.6469	315	1;1;2;1	#NUM!	#NUM!	a
C01_RD14-0003-50_29_30_31-1;1;2;1-M2a-0.315GF-Q0.5_03.15sec	WA29612_Cauc	4	#NUM!	-5.24932	315	1;1;2;1	#NUM!	#NUM!	a
C01_RD14-0003-50_29_30_31-1;1;2;1-M2a-0.315GF-Q0.5_03.15sec	ZT81372_Cauc	4	#NUM!	-5.25637	315	1;1;2;1	#NUM!	#NUM!	a
C04_RD14-0003-48_49_50_29-1;4;4;4-M1U105-0.75GF-Q1.0_03.15sec	C19H_Hisp	4	#NUM!	-1.71091	750	1;4;4;4	#NUM!	#NUM!	U105
C04_RD14-0003-48_49_50_29-1;4;4;4-M1U105-0.75GF-Q1.0_03.15sec	C74C_Cauc	4	#NUM!	-1.80868	750	1;4;4;4	#NUM!	#NUM!	U105
C04_RD14-0003-48_49_50_29-1;4;4;4-M1U105-0.75GF-Q1.0_03.15sec	C86C_Cauc	4	#NUM!	-6.24202	750	1;4;4;4	#NUM!	#NUM!	U105
C04_RD14-0003-48_49_50_29-1;4;4;4-M1U105-0.75GF-Q1.0_03.15sec	PT84256_AA	4	#NUM!	-4.91646	750	1;4;4;4	#NUM!	#NUM!	U105
C04_RD14-0003-48_49_50_29-1;4;4;4-M2I35-0.75GF-Q58.3_03.15sec	C55C_Cauc	4	#NUM!	-3.91538	750	1;4;4;4	#NUM!	#NUM!	I35
C04_RD14-0003-48_49_50_29-1;4;4;4-M2I35-0.75GF-Q58.3_03.15sec	C86B_AA	4	#NUM!	-4.49736	750	1;4;4;4	#NUM!	#NUM!	I35
C04_RD14-0003-48_49_50_29-1;4;4;4-M2I35-0.75GF-Q58.3_03.15sec	MT97173_Cauc	4	#NUM!	-4.47744	750	1;4;4;4	#NUM!	#NUM!	I35
C04_RD14-0003-48_49_50_29-1;4;4;4-M2I35-0.75GF-Q58.3_03.15sec	OT05597_AA	4	#NUM!	-1.62692	750	1;4;4;4	#NUM!	#NUM!	I35
C10_RD14-0003-48_49_50_29-1;4;4;4-M3a-0.195GF-Q0.4_03.15sec	PT84201_AA	4	#NUM!	-0.382211	195	1;4;4;4	#NUM!	#NUM!	a
C10_RD14-0003-48_49_50_29-1;4;4;4-M3a-0.195GF-Q0.4_03.15sec	ZT79837_Hisp	4	#NUM!	-0.375899	195	1;4;4;4	#NUM!	#NUM!	a
D01_RD14-0003-50_29_30_31-1;1;2;1-M2a-0.155GF-Q0.5_04.15sec	C36A_Asian	4	#NUM!	-4.85199e-05	155	1;1;2;1	#NUM!	#NUM!	a
D01_RD14-0003-50_29_30_31-1;1;2;1-M2a-0.155GF-Q0.5_04.15sec	MT97186_Cauc	4	#NUM!	9.15193e-06	155	1;1;2;1	#NUM!	#NUM!	a
D01_RD14-0003-50_29_30_31-1;1;2;1-M2a-0.155GF-Q0.5_04.15sec	Y32_Cauc	4	#NUM!	3.07622e-05	155	1;1;2;1	#NUM!	#NUM!	a
D04_RD14-0003-48_49_50_29-1;4;4;4-M1U105-0.403GF-Q1.0_04.15sec	C02Ba_AA	4	#NUM!	-4.419	403	1;4;4;4	#NUM!	#NUM!	U105
D04_RD14-0003-48_49_50_29-1;4;4;4-M1U105-0.403GF-Q1.0_04.15sec	C70H_Hisp	4	#NUM!	-5.58849	403	1;4;4;4	#NUM!	#NUM!	U105
D04_RD14-0003-48_49_50_29-1;4;4;4-M1U105-0.403GF-Q1.0_04.15sec	GT37312_Hisp	4	#NUM!	-9.95954	403	1;4;4;4	#NUM!	#NUM!	U105
D04_RD14-0003-48_49_50_29-1;4;4;4-M1U105-0.403GF-Q1.0_04.15sec	UT57299_Cauc	4	#NUM!	-10.0194	403	1;4;4;4	#NUM!	#NUM!	U105
D04_RD14-0003-48_49_50_29-1;4;4;4-M2I35-0.403GF-Q58.3_04.15sec	C66B_AA	4	#NUM!	-1.38668	403	1;4;4;4	#NUM!	#NUM!	I35
D04_RD14-0003-48_49_50_29-1;4;4;4-M2I35-0.403GF-Q58.3_04.15sec	PT84247_AA	4	#NUM!	-2.76205	403	1;4;4;4	#NUM!	#NUM!	I35
D04_RD14-0003-48_49_50_29-1;4;4;4-M2I35-0.403GF-Q58.3_04.15sec	ZT80659_Hisp	4	#NUM!	0.670152	403	1;4;4;4	#NUM!	#NUM!	I35
E03_RD14-0003-48_49_50_29-1;4;4;4-M2I15-0.75GF-Q1.1_05.15sec	GT38094_Cauc	4	#NUM!	-1.03633	750	1;4;4;4	#NUM!	#NUM!	I15
E03_RD14-0003-48_49_50_29-1;4;4;4-M2I15-0.75GF-Q1.1_05.15sec	MT95379_AA	4	#NUM!	-1.92871	750	1;4;4;4	#NUM!	#NUM!	I15
E03_RD14-0003-48_49_50_29-1;4;4;4-M2I15-0.75GF-Q1.1_05.15sec	MT97185_Cauc	4	#NUM!	0.939527	750	1;4;4;4	#NUM!	#NUM!	I15
E03_RD14-0003-48_49_50_29-1;4;4;4-M2I15-0.75GF-Q1.1_05.15sec	PT84191_AA	4	#NUM!	-3.67813	750	1;4;4;4	#NUM!	#NUM!	I15
E03_RD14-0003-48_49_50_29-1;4;4;4-M2U15-0.75GF-Q1.3_05.15sec	C50A_Asian	4	#NUM!	0.000173862	750	1;4;4;4	#NUM!	#NUM!	U15
E03_RD14-0003-48_49_50_29-1;4;4;4-M2U15-0.75GF-Q1.3_05.15sec	C98H_Hisp	4	#NUM!	-0.000103998	750	1;4;4;4	#NUM!	#NUM!	U15
E03_RD14-0003-48_49_50_29-1;4;4;4-M2U15-0.75GF-Q1.3_05.15sec	JT51488_AA	4	#NUM!	0.22165	750	1;4;4;4	#NUM!	#NUM!	U15
E03_RD14-0003-48_49_50_29-1;4;4;4-M2U15-0.75GF-Q1.3_05.15sec	PT85499_Hisp	4	#NUM!	3.72433e-05	750	1;4;4;4	#NUM!	#NUM!	U15
E05_RD14-0003-33_34_35_36-1;4;4;1-M2a-0.63GF-Q0.5_05.15sec	C41C_Cauc	4	#NUM!	-2.49589	630	1;4;4;1	#NUM!	#NUM!	a
E05_RD14-0003-33_34_35_36-1;4;4;1-M2a-0.63GF-Q0.5_05.15sec	MT95124_AA	4	#NUM!	-3.96947	630	1;4;4;1	#NUM!	#NUM!	a
E05_RD14-0003-33_34_35_36-1;4;4;1-M2a-0.63GF-Q0.5_05.15sec	PT84215_AA	4	#NUM!	-4.87838	630	1;4;4;1	#NUM!	#NUM!	a
E05_RD14-0003-33_34_35_36-1;4;4;1-M2a-0.63GF-Q0.5_05.15sec	PT84223_AA	4	#NUM!	-5.00961	630	1;4;4;1	#NUM!	#NUM!	a
F03_RD14-0003-48_49_50_29-1;4;4;4-M2I15-0.403GF-Q1.1_06.15sec	C25C_Cauc	4	#NUM!	-3.51835	403	1;4;4;4	#NUM!	#NUM!	I15
F03_RD14-0003-48_49_50_29-1;4;4;4-M2I15-0.403GF-Q1.1_06.15sec	C99C_Cauc	4	#NUM!	-3.44673	403	1;4;4;4	#NUM!	#NUM!	I15
F03_RD14-0003-48_49_50_29-1;4;4;4-M2I15-0.403GF-Q1.1_06.15sec	JT51469_AA	4	#NUM!	-3.72683	403	1;4;4;4	#NUM!	#NUM!	I15
F03_RD14-0003-48_49_50_29-1;4;4;4-M2U15-0.403GF-Q1.3_06.15sec	MT95356_AA	4	#NUM!	-2.42337	403	1;4;4;4	#NUM!	#NUM!	U15
F03_RD14-0003-48_49_50_29-1;4;4;4-M2U15-0.403GF-Q1.3_06.15sec	WT51503_AA	4	#NUM!	-2.37982	403	1;4;4;4	#NUM!	#NUM!	U15
F05_RD14-0003-33_34_35_36-1;4;4;1-M2a-0.31GF-Q0.5_06.15sec	PT84195_AA	4	#NUM!	-1.33988	310	1;4;4;1	#NUM!	#NUM!	a
F05_RD14-0003-33_34_35_36-1;4;4;1-M2a-0.31GF-Q0.5_06.15sec	PT84211_AA	4	#NUM!	-1.3013	310	1;4;4;1	#NUM!	#NUM!	a
G02_RD14-0003-44_45_46_47-1;1;4;1-M2a-0.441GF-Q0.7_07.15sec	Y12_Cauc	4	#NUM!	-0.829017	441	1;1;4;1	#NUM!	#NUM!	a
G02_RD14-0003-50_29_30_31-1;1;2;1-M2e-0.315GF-Q1.0_07.15sec	GT37020_AA	4	#NUM!	-2.93473	315	1;1;2;1	#NUM!	#NUM!	e
G02_RD14-0003-50_29_30_31-1;1;2;1-M2e-0.315GF-Q1.0_07.15sec	Y32_Cauc	4	#NUM!	-3.20946	315	1;1;2;1	#NUM!	#NUM!	e
G04_RD14-0003-40_41_42_43-1;1;1;1-M1S10-0.5GF-Q1.3_07.15sec	C35C_Cauc	4	#NUM!	0.326795	500	1;1;1;1	#NUM!	#NUM!	S10
G04_RD14-0003-40_41_42_43-1;1;1;1-M1S10-0.5GF-Q1.3_07.15sec	C83H_Hisp	4	#NUM!	0.000136026	500	1;1;1;1	#NUM!	#NUM!	S10
G04_RD14-0003-40_41_42_43-1;1;1;1-M1S10-0.5GF-Q1.3_07.15sec	OT05562_AA	4	#NUM!	0.000163083	500	1;1;1;1	#NUM!	#NUM!	S10
G05_RD14-0003-33_34_35_36-1;4;4;1-M2a-0.15GF-Q0.5_07.15sec	GT37047_AA	4	#NUM!	-2.48062e-05	150	1;4;4;1	#NUM!	#NUM!	a
H02_RD14-0003-44_45_46_47-1;1;4;1-M3a-0.217GF-Q0.8_08.15sec	GT37184_AA	4	#NUM!	-0.225989	217	1;1;4;1	#NUM!	#NUM!	a
H03_RD14-0003-48_49_50_29-1;4;4;4-M1U60-0.75GF-Q1.0_08.15sec	C17C_Cauc	4	#NUM!	-8.53895	750	1;4;4;4	#NUM!	#NUM!	U60
H03_RD14-0003-48_49_50_29-1;4;4;4-M1U60-0.75GF-Q1.0_08.15sec	C82H_Hisp	4	#NUM!	-8.48023	750	1;4;4;4	#NUM!	#NUM!	U60
H03_RD14-0003-48_49_50_29-1;4;4;4-M1U60-0.75GF-Q1.0_08.15sec	JT51331_AA	4	#NUM!	-7.37857	750	1;4;4;4	#NUM!	#NUM!	U60
H03_RD14-0003-48_49_50_29-1;4;4;4-M1U60-0.75GF-Q1.0_08.15sec	OT07785_Cauc	4	#NUM!	-4.76078	750	1;4;4;4	#NUM!	#NUM!	U60
H03_RD14-0003-48_49_50_29-1;4;4;4-M3I22-0.75GF-Q1.7_08.15sec	C71H_Hisp	4	#NUM!	-6.4277	750	1;4;4;4	#NUM!	#NUM!	I22
H03_RD14-0003-48_49_50_29-1;4;4;4-M3I22-0.75GF-Q1.7_08.15sec	C99B_AA	4	#NUM!	-6.73416	750	1;4;4;4	#NUM!	#NUM!	I22
H03_RD14-0003-48_49_50_29-1;4;4;4-M3I22-0.75GF-Q1.7_08.15sec	UT58335_Cauc	4	#NUM!	-6.52393	750	1;4;4;4	#NUM!	#NUM!	I22
H03_RD14-0003-48_49_50_29-1;4;4;4-M3I22-0.75GF-Q1.7_08.15sec	Y33_AA	4	#NUM!	-6.29595	750	1;4;4;4	#NUM!	#NUM!	I22
H09_RD14-0003-48_49_50_29-1;4;4;4-M2a-0.75GF-Q0.4_08.15sec	C27B_AA	4	#NUM!	-2.40503	750	1;4;4;4	#NUM!	#NUM!	a
H09_RD14-0003-48_49_50_29-1;4;4;4-M2a-0.75GF-Q0.4_08.15sec	C45A_Asian	4	#NUM!	-2.04843	750	1;4;4;4	#NUM!	#NUM!	a
H09_RD14-0003-48_49_50_29-1;4;4;4-M2a-0.75GF-Q0.4_08.15sec	GT37913_Hisp	4	#NUM!	-4.74415	750	1;4;4;4	#NUM!	#NUM!	a
H09_RD14-0003-48_49_50_29-1;4;4;4-M2a-0.75GF-Q0.4_08.15sec	WT51556_AA	4	#NUM!	-2.27606	750	1;4;4;4	#NUM!	#NUM!	a
H07_RD14-0003-30_31_32-1;4;4-M1U60-0.279GF-Q0.8_08.15sec	PT84386_Hisp	3	-43.6556	-7.66877	279	1;4;4	-35.9868	35.9868	U60
B01_RD14-0003-40_41_42_43-1;1;1;1-M3I15-0.252GF-Q1.6_02.15sec	MT94858_Cauc	4	-25.1649	0.0126399	252	1;1;1;1	-25.1776	25.1776	I15
B01_RD14-0003-40_41_42_43-1;1;1;1-M3I15-0.252GF-Q1.6_02.15sec	UA16897_Cauc	4	-24.7423	4.64633e-05	252	1;1;1;1	-24.7424	24.7424	I15
B01_RD14-0003-40_41_42_43-1;1;1;1-M3I15-0.252GF-Q1.6_02.15sec	C95H_Hisp	4	-24.6421	0.0856384	252	1;1;1;1	-24.7277	24.7277	I15
D06_RD14-0003-49_50_29-1;4;1-M4I22-0.186GF-Q2.1_04.15sec	GA05070_Hisp	3	-23.7282	-0.637031	186	1;4;1	-23.0911	23.0911	I22
C01_RD14-0003-40_41_42_43-1;1;1;1-M3a-0.252GF-Q0.9_03.15sec	C95C_Cauc	4	-22.6799	-0.000433609	252	1;1;1;1	-22.6794	22.6794	a
D01_RD14-0003-50_29_30_31-1;1;2;1-M2a-0.155GF-Q0.5_04.15sec	Y38_Hisp	4	-21.8928	9.36793e-06	155	1;1;2;1	-21.8928	21.8928	a
A03_RD14-0003-44_45_46_47-1;1;4;1-M3I35-0.441GF-QLAND_01.15sec	ZT79310_AA	4	-21.8665	2.03676e-05	441	1;1;4;1	-21.8665	21.8665	I35
F09_RD14-0003-30_31_32-1;4;4-M2a-0.279GF-Q0.6_06.15sec	TT51035_Hisp	3	-33.4168	-11.8606	279	1;4;4	-21.5562	21.5562	a
D02_RD14-0003-50_29_30_31-1;1;2;1-M2d-0.155GF-Q0.8_04.15sec	GT36878_Cauc	4	-21.0164	0.000124248	155	1;1;2;1	-21.0165	21.0165	d
D02_RD14-0003-50_29_30_31-1;1;2;1-M2d-0.155GF-Q0.8_04.15sec	TT50698_Cauc	4	-20.8477	9.37464e-05	155	1;1;2;1	-20.8478	20.8478	d
F06_RD14-0003-49_50_29-1;4;1-M4I35-0.378GF-QLAND_06.15sec	C79A_Asian	3	-21.7645	-1.06454	378	1;4;1	-20.6999	20.6999	I35
F06_RD14-0003-49_50_29-1;4;1-M4I35-0.378GF-QLAND_06.15sec	ZT79338_AA	3	-21.0762	-0.863293	378	1;4;1	-20.2129	20.2129	I35
E04_RD14-0003-33_34-1;2-M4d-0.045GF-Q1.3_05.15sec	PT83880_AA	2	-26.6383	-6.46435	45	1;2	-20.1739	20.1739	d
G02_RD14-0003-50_29_30_31-1;1;2;1-M2e-0.315GF-Q1.0_07.15sec	MT97124_Cauc	4	-23.2041	-3.18312	315	1;1;2;1	-20.021	20.021	e
B01_RD14-0003-40_41_42_43-1;1;1;1-M3I15-0.252GF-Q1.6_02.15sec	C99C_Cauc	4	-19.6271	4.64333e-05	252	1;1;1;1	-19.6271	19.6271	I15
B04_RD14-0003-42_43-1;9-M3I22-0.15GF-Q1.5_02.15sec	C52C_Cauc	2	-22.4449	-2.95655	150	1;9	-19.4884	19.4884	I22
F03_RD14-0003-48_49_50_29-1;4;4;4-M2U15-0.403GF-Q1.3_06.15sec	C79H_Hisp	4	-17.3947	0.56861	403	1;4;4;4	-17.9633	17.9633	U15
A04_RD14-0003-48_49_50_29-1;4;4;4-M2U60-0.403GF-Q4.9_01.15sec	MT97195_Cauc	4	-17.7773	-5.72162e-05	403	1;4;4;4	-17.7772	17.7772	U60
G05_RD14-0003-33_34_35_36-1;4;4;1-M2a-0.15GF-Q0.5_07.15sec	C89C_Cauc	4	-17.3979	0.0250508	150	1;4;4;1	-17.423	17.423	a
A06_RD14-0003-49_50_29-1;4;1-M3I15-0.186GF-Q0.9_01.15sec	OT07760_Cauc	3	-18.5686	-1.19035	186	1;4;1	-17.3783	17.3783	I15
G06_RD14-0003-44_45_46-1;2;2-M2d-0.315GF-Q1.8_07.15sec	WA29572_Cauc	3	-19.9747	-2.9172	315	1;2;2	-17.0575	17.0575	d
A07_RD14-0003-33_34_35_36-1;4;4;1-M1e-0.63GF-Q1.2_01.15sec	C54A_Asian	4	-18.5575	-1.8023	630	1;4;4;1	-16.7552	16.7552	e
G02_RD14-0003-44_45_46_47-1;1;4;1-M2a-0.441GF-Q0.7_07.15sec	GT38066_Cauc	4	-17.1965	-0.774944	441	1;1;4;1	-16.4216	16.4216	a
C01_RD14-0003-40_41_42_43-1;1;1;1-M3a-0.252GF-Q0.9_03.15sec	OT05570_AA	4	-16.3696	0.000307394	252	1;1;1;1	-16.3699	16.3699	a
A07_RD14-0003-33_34_35_36-1;4;4;1-M1e-0.63GF-Q1.2_01.15sec	PT83899_AA	4	-17.9666	-1.77629	630	1;4;4;1	-16.1903	16.1903	e
A02_RD14-0003-40_41-1;4-M3S30-0.075GF-Q4.0_01.15sec	ZT80163_Hisp	2	-21.7932	-5.69868	75	1;4	-16.0945	16.0945	S30
G04_RD14-0003-41_42_43-1;9;1-M1e-0.693GF-Q1.4_07.15sec	GT37913_Hisp	3	-16.9208	-1.37617	693	1;9;1	-15.5446	15.5446	e
F03_RD14-0003-48_49_50_29-1;4;4;4-M2U15-0.403GF-Q1.3_06.15sec	UT58321_Cauc	4	-17.7447	-2.32378	403	1;4;4;4	-15.4209	15.4209	U15
C01_RD14-0003-40_41_42_43-1;1;1;1-M3a-0.252GF-Q0.9_03.15sec	UT58314_Cauc	4	-15.399	0.000307704	252	1;1;1;1	-15.3993	15.3993	a
D11_RD14-0003-48_49_50_29-1;4;4;4-M1e-0.75GF-Q1.1_04.15sec	PT85612_Hisp	4	-18.4078	-3.08425	750	1;4;4;4	-15.3236	15.3236	e
C10_RD14-0003-48_49_50_29-1;4;4;4-M3a-0.195GF-Q0.4_03.15sec	Y21_Hisp	4	-15.6536	-0.425436	195	1;4;4;4	-15.2282	15.2282	a
D02_RD14-0003-50_29_30_31-1;1;2;1-M2d-0.155GF-Q0.8_04.15sec	PT86478_Cauc	4	-14.9393	0.000127613	155	1;1;2;1	-14.9394	14.9394	d
D04_RD14-0003-48_49_50_29-1;4;4;4-M2I35-0.403GF-Q58.3_04.15sec	JT51335_AA	4	-16.4828	-1.64293	403	1;4;4;4	-14.8399	14.8399	I35
G02_RD14-0003-40_41-1;4-M3U60-0.155GF-Q10.9_07.15sec	C55H_Hisp	2	-21.2487	-6.41202	155	1;4	-14.8367	14.8367	U60
E04_RD14-0003-36_37_38_39-1;2;2;1-M3a-0.186GF-Q0.7_05.15sec	WT52471_Cauc	4	-15.3036	-0.47165	186	1;2;2;1	-14.832	14.832	a
G02_RD14-0003-44_45_46_47-1;1;4;1-M2a-0.441GF-Q0.7_07.15sec	C76A_Asian	4	-15.5114	-0.785723	441	1;1;4;1	-14.7257	14.7257	a
B04_RD14-0003-42_43-1;9-M2U60-0.15GF-Q4.6_02.15sec	MT94807_Cauc	2	-21.5058	-6.8509	150	1;9	-14.6549	14.6549	U60
C01_RD14-0003-40_41_42_43-1;1;1;1-M3a-0.252GF-Q0.9_03.15sec	ZT80154_Hisp	4	-14.6345	0.0002776	252	1;1;1;1	-14.6348	14.6348	a
F02_RD14-0003-36_37_38-1;2;1-M2e-0.5GF-Q0.9_06.15sec	MT97199_Cauc	3	-19.118	-4.59858	500	1;2;1	-14.5195	14.5195	e
E04_RD14-0003-42_43-1;9-M2U105-0.15GF-Q10.4_05.15sec	PT84213_AA	2	-15.9245	-1.42165	150	1;9	-14.5028	14.5028	U105
H01_RD14-0003-50_29_30_31-1;1;2;1-M2c-0.155GF-Q0.6_08.15sec	C35H_Hisp	4	-16.6635	-2.29244	155	1;1;2;1	-14.3711	14.3711	c
G02_RD14-0003-44_45_46_47-1;1;4;1-M2a-0.441GF-Q0.7_07.15sec	PT84222_AA	4	-15.0752	-0.792036	441	1;1;4;1	-14.2832	14.2832	a
D04_RD14-0003-36_37_38_39-1;2;2;1-M2a-0.378GF-Q0.7_04.15sec	TT50913_AA	4	-16.2097	-2.03879	378	1;2;2;1	-14.1709	14.1709	a
E08_RD14-0003-47_48_49-1;9;9-M2c-0.5GF-Q1.1_05.15sec	C13A_Asian	3	-26.1765	-12.008	500	1;9;9	-14.1686	14.1686	c
G04_RD14-0003-40_41_42_43-1;1;1;1-M1S10-0.5GF-Q1.3_07.15sec	UT58318_Cauc	4	-14.1002	4.05402e-05	500	1;1;1;1	-14.1002	14.1002	S10
G06_RD14-0003-49_50_29-1;4;1-M4I35-0.186GF-QLAND_07.15sec	MT94817_Cauc	3	-13.6459	0.32488	186	1;4;1	-13.9708	13.9708	I35
B04_RD14-0003-42_43-1;9-M2U60-0.15GF-Q4.6_02.15sec	C06C_Cauc	2	-19.5817	-5.71635	150	1;9	-13.8653	13.8653	U60
B08_RD14-0003-49_50_29-1;4;1-M4a-0.09GF-Q0.5_02.15sec	C42C_Cauc	3	-13.6536	0.198581	90	1;4;1	-13.8522	13.8522	a
A04_RD14-0003-48_49_50_29-1;4;4;4-M2U60-0.403GF-Q4.9_01.15sec	OT05568_AA	4	-13.6819	-2.64369e-05	403	1;4;4;4	-13.6819	13.6819	U60
D02_RD14-0003-50_29_30_31-1;1;2;1-M2d-0.155GF-Q0.8_04.15sec	C18H_Hisp	4	-13.6421	0.0193114	155	1;1;2;1	-13.6614	13.6614	d
A04_RD14-0003-48_49_50_29-1;4;4;4-M2U60-0.403GF-Q4.9_01.15sec	PT84256_AA	4	-13.5834	0.0184205	403	1;4;4;4	-13.6018	13.6018	U60
C10_RD14-0003-48_49_50_29-1;4;4;4-M3a-0.195GF-Q0.4_03.15sec	TT50701_Cauc	4	-12.9208	0.646338	195	1;4;4;4	-13.5672	13.5672	a
G06_RD14-0003-49_50_29-1;4;1-M4I35-0.186GF-QLAND_07.15sec	TT51208_Hisp	3	-13.5784	-0.0116184	186	1;4;1	-13.5668	13.5668	I35
A03_RD14-0003-44_45_46_47-1;1;4;1-M3I35-0.441GF-QLAND_01.15sec	GT37853_Hisp	4	-13.5436	0.00082633	441	1;1;4;1	-13.5445	13.5445	I35
A03_RD14-0003-44_45_46_47-1;1;4;1-M3I35-0.441GF-QLAND_01.15sec	GT38093_Cauc	4	-13.5214	2.71015e-05	441	1;1;4;1	-13.5215	13.5215	I35
A07_RD14-0003-49_50_29-1;4;1-M1U105-0.186GF-Q0.6_01.15sec	C51A_Asian	3	-14.0857	-0.759512	186	1;4;1	-13.3261	13.3261	U105
A04_RD14-0003-48_49_50_29-1;4;4;4-M3I22-0.403GF-Q1.7_01.15sec	ZT80655_Hisp	4	-13.2676	-6.03971e-05	403	1;4;4;4	-13.2675	13.2675	I22
D01_RD14-0003-36_37_38-1;2;1-M3a-0.124GF-Q0.7_04.15sec	JT51493_AA	3	-18.0467	-4.80747	124	1;2;1	-13.2392	13.2392	a
A05_RD14-0003-46_47_48-1;1;1-M3U15-0.093GF-Q0.7_01.15sec	GT37767_Hisp	3	-19.4685	-6.23725	93	1;1;1	-13.2313	13.2313	U15
B04_RD14-0003-48_49_50_29-1;4;4;4-M2U60-0.195GF-Q4.9_02.15sec	ZT79307_AA	4	-13.1397	0.000224094	195	1;4;4;4	-13.1399	13.1399	U60
E01_RD14-0003-40_41_42_43-1;1;1;1-M4I22-0.252GF-Q3.5_05.15sec	PT84242_AA	4	-12.9666	0.00024404	252	1;1;1;1	-12.9668	12.9668	I22
B04_RD14-0003-48_49_50_29-1;4;4;4-M3I22-0.195GF-Q1.7_02.15sec	C47A_Asian	4	-12.9469	8.19e-05	195	1;4;4;4	-12.947	12.947	I22
D11_RD14-0003-48_49_50_29-1;4;4;4-M1e-0.75GF-Q1.1_04.15sec	ZT79868_Hisp	4	-15.9747	-3.10516	750	1;4;4;4	-12.8695	12.8695	e
F02_RD14-0003-44_45_46_47-1;1;4;1-M3I22-0.441GF-Q1.9_06.15sec	C13A_Asian	4	-13.9469	-1.11397	441	1;1;4;1	-12.833	12.833	I22
A07_RD14-0003-33_34_35_36-1;4;4;1-M1e-0.63GF-Q1.2_01.15sec	ZT79303_AA	4	-14.064	-1.26043	630	1;4;4;1	-12.8036	12.8036	e
H01_RD14-0003-50_29_30_31-1;1;2;1-M2c-0.155GF-Q0.6_08.15sec	ZT81342_Cauc	4	-15.1415	-2.3454	155	1;1;2;1	-12.7961	12.7961	c
B04_RD14-0003-48_49_50_29-1;4;4;4-M2U60-0.195GF-Q4.9_02.15sec	WT51381_Cauc	4	-12.7878	0.000206531	195	1;4;4;4	-12.788	12.788	U60
F03_RD14-0003-48_49_50_29-1;4;4;4-M2I15-0.403GF-Q1.1_06.15sec	C59H_Hisp	4	-14.3045	-1.73293	403	1;4;4;4	-12.5716	12.5716	I15
D06_RD14-0003-46_47_48-1;1;1-M3a-0.093GF-Q0.5_04.15sec	ZT79336_AA	3	-18.2716	-5.81075	93	1;1;1	-12.4609	12.4609	a
H02_RD14-0003-50_29_30_31-1;1;2;1-M2e-0.155GF-Q1.0_08.15sec	C98A_Asian	4	-13.1778	-0.823103	155	1;1;2;1	-12.3547	12.3547	e
A08_RD14-0003-49_50_29-1;4;1-M3a-0.186GF-Q0.5_01.15sec	C88A_Asian	3	-12.248	0.0195921	186	1;4;1	-12.2675	12.2675	a
G02_RD14-0003-36_37_38-1;2;1-M2e-0.252GF-Q0.9_07.15sec	C76A_Asian	3	-16.857	-4.5951	252	1;2;1	-12.2619	12.2619	e
E04_RD14-0003-42_43-1;9-M3I35-0.15GF-QLAND_05.15sec	JT51332_AA	2	-19.0434	-6.8954	150	1;9	-12.148	12.148	I35
B04_RD14-0003-48_49_50_29-1;4;4;4-M3I22-0.195GF-Q1.7_02.15sec	ZT79907_Hisp	4	-12.1007	0.0002944	195	1;4;4;4	-12.101	12.101	I22
G04_RD14-0003-46_47_48-1;1;1-M3I15-0.093GF-Q0.8_07.15sec	C21C_Cauc	3	-13.2534	-1.20282	93	1;1;1	-12.0505	12.0505	I15
D04_RD14-0003-36_37_38_39-1;2;2;1-M2a-0.378GF-Q0.7_04.15sec	C38H_Hisp	4	-14.0894	-2.04724	378	1;2;2;1	-12.0421	12.0421	a
E10_RD14-0003-30_31_32-1;4;4-M2e-0.567GF-Q1.0_05.15sec	GT38089_Cauc	3	-14.2306	-2.2552	567	1;4;4	-11.9754	11.9754	e
D01_RD14-0003-40_41_42_43-1;1;1;1-M3a-0.124GF-Q0.9_04.15sec	C48B_AA	4	-11.9706	0.000239917	124	1;1;1;1	-11.9709	11.9709	a
H01_RD14-0003-40_41_42_43-1;1;1;1-M4I35-0.252GF-QLAND_08.15sec	C38C_Cauc	4	-11.8996	0.000113137	252	1;1;1;1	-11.8997	11.8997	I35
H04_RD14-0003-32_33_34_35-1;1;9;1-M1e-0.5GF-Q0.7_08.15sec	MT95114_AA	4	-12.3904	-0.684545	500	1;1;9;1	-11.7059	11.7059	e
A06_RD14-0003-44_45_46-1;2;2-M3a-0.075GF-Q0.6_01.15sec	C29H_Hisp	3	-12.2168	-0.566327	75	1;2;2	-11.6505	11.6505	a
G08_RD14-0003-47_48_49-1;9;9-M2d-0.75GF-Q1.4_07.15sec	C14A_Asian	3	-16.0846	-4.56295	750	1;9;9	-11.5216	11.5216	d
C02_RD14-0003-44_45_46_47-1;1;4;1-M3I15-0.441GF-Q1.1_03.15sec	OT05898_AA	4	-12.0921	-0.60358	441	1;1;4;1	-11.4885	11.4885	I15
C02_RD14-0003-36_37_38-1;2;1-M2d-0.252GF-Q0.9_03.15sec	Y2_Cauc	3	-16.04	-4.57381	252	1;2;1	-11.4662	11.4662	d
B08_RD14-0003-49_50_29-1;4;1-M4a-0.09GF-Q0.5_02.15sec	PT84251_AA	3	-11.4584	-0.0578999	90	1;4;1	-11.4005	11.4005	a
F02_RD14-0003-44_45_46_47-1;1;4;1-M3I22-0.441GF-Q1.9_06.15sec	Y33_AA	4	-12.4711	-1.08991	441	1;1;4;1	-11.3812	11.3812	I22
B04_RD14-0003-40_41-1;4-M4e-0.075GF-Q0.7_02.15sec	GT37869_Hisp	2	-15.9747	-4.59725	75	1;4	-11.3774	11.3774	e
C01_RD14-0003-44_45-1;1-M4I15-0.062GF-Q1.2_03.15sec	C77A_Asian	2	-20.6655	-9.38565	62	1;1	-11.2799	11.2799	I15
D01_RD14-0003-44_45-1;1-M4I15-0.03GF-Q1.2_04.15sec	UT57286_Cauc	2	-11.1543	-0.000248722	30	1;1	-11.154	11.154	I15
C09_RD14-0003-47_48_49-1;9;9-M1e-0.75GF-Q2.2_03.15sec	UT57281_Cauc	3	-21.0031	-9.8704	750	1;9;9	-11.1327	11.1327	e
C07_RD14-0003-30_31_32-1;4;4-M4I15-0.135GF-Q1.4_03.15sec	PT83535_Cauc	3	-13.2396	-2.13896	135	1;4;4	-11.1006	11.1006	I15
B04_RD14-0003-48_49_50_29-1;4;4;4-M2U60-0.195GF-Q4.9_02.15sec	C39A_Asian	4	-10.9788	-4.36e-05	195	1;4;4;4	-10.9788	10.9788	U60
D11_RD14-0003-48_49_50_29-1;4;4;4-M1e-0.75GF-Q1.1_04.15sec	C64B_AA	4	-14.1129	-3.20717	750	1;4;4;4	-10.9058	10.9058	e
D01_RD14-0003-40_41_42_43-1;1;1;1-M3a-0.124GF-Q0.9_04.15sec	C90H_Hisp	4	-10.8996	0.000199882	124	1;1;1;1	-10.8998	10.8998	a
D06_RD14-0003-49_50_29-1;4;1-M4I22-0.186GF-Q2.1_04.15sec	MT95102_AA	3	-11.7825	-0.886716	186	1;4;1	-10.8958	10.8958	I22
E01_RD14-0003-44_45-1;1-M4a-0.031GF-Q0.5_05.15sec	PT86536_Cauc	2	-22.1232	-11.2349	31	1;1	-10.8883	10.8883	a
A02_RD14-0003-50_29_30_31-1;1;2;1-M3c-0.075GF-Q0.5_01.15sec	WT51381_Cauc	4	-11.618	-0.746647	75	1;1;2;1	-10.8713	10.8713	c
F02_RD14-0003-44_45_46_47-1;1;4;1-M3I22-0.441GF-Q1.9_06.15sec	JT51331_AA	4	-11.8894	-1.03996	441	1;1;4;1	-10.8495	10.8495	I22
A02_RD14-0003-50_29_30_31-1;1;2;1-M3c-0.075GF-Q0.5_01.15sec	C45C_Cauc	4	-11.5702	-0.73218	75	1;1;2;1	-10.8381	10.8381	c
A04_RD14-0003-48_49_50_29-1;4;4;4-M3I22-0.403GF-Q1.7_01.15sec	GT37542_Hisp	4	-10.8013	-8.70998e-05	403	1;4;4;4	-10.8013	10.8013	I22
G05_RD14-0003-33_34_35_36-1;4;4;1-M2a-0.15GF-Q0.5_07.15sec	C89B_AA	4	-10.7375	1.50212e-05	150	1;4;4;1	-10.7376	10.7376	a
B07_RD14-0003-30_31_32-1;4;4-M3I15-0.279GF-Q1.1_02.15sec	C85A_Asian	3	-12.2351	-1.50086	279	1;4;4	-10.7342	10.7342	I15
F08_RD14-0003-47_48_49-1;9;9-M2c-0.285GF-Q1.1_06.15sec	GT37312_Hisp	3	-14.7905	-4.08169	285	1;9;9	-10.7088	10.7088	c
A09_RD14-0003-47_48_49-1;9;9-M2d-0.5GF-Q1.4_01.15sec	PT84180_AA	3	-17.9245	-7.30831	500	1;9;9	-10.6161	10.6161	d
B04_RD14-0003-48_49_50_29-1;4;4;4-M2U60-0.195GF-Q4.9_02.15sec	C37A_Asian	4	-10.6073	0.000221178	195	1;4;4;4	-10.6075	10.6075	U60
H07_RD14-0003-37_38_39_40-1;9;9;1-M2a-0.62GF-Q0.4_08.15sec	C04C_Cauc	4	-12.3002	-1.82062	620	1;9;9;1	-10.4795	10.4795	a
F09_RD14-0003-47_48_49-1;9;9-M2e-0.5GF-Q1.5_06.15sec	C33A_Asian	3	-13.6925	-3.25532	500	1;9;9	-10.4372	10.4372	e
F05_RD14-0003-33_34_35_36-1;4;4;1-M2a-0.31GF-Q0.5_06.15sec	Y5_Cauc	4	-10.7986	-0.528838	310	1;4;4;1	-10.2698	10.2698	a
A02_RD14-0003-50_29_30_31-1;1;2;1-M3c-0.075GF-Q0.5_01.15sec	TT50913_AA	4	-10.9706	-0.72175	75	1;1;2;1	-10.2489	10.2489	c
E01_RD14-0003-50_29_30_31-1;1;2;1-M3a-0.075GF-Q0.5_05.15sec	C55C_Cauc	4	-11.0921	-0.907114	75	1;1;2;1	-10.1849	10.1849	a
E01_RD14-0003-40_41_42_43-1;1;1;1-M4I22-0.252GF-Q3.5_05.15sec	C65A_Asian	4	-9.95078	-0.000354212	252	1;1;1;1	-9.95043	9.95043	I22
G02_RD14-0003-50_29_30_31-1;1;2;1-M2e-0.315GF-Q1.0_07.15sec	UT58337_Cauc	4	-13.1232	-3.1856	315	1;1;2;1	-9.93761	9.93761	e
G03_RD14-0003-48_49_50_29-1;4;4;4-M3I15-0.195GF-Q1.1_07.15sec	PT84200_AA	4	-9.77728	0.000357801	195	1;4;4;4	-9.77764	9.77764	I15
A08_RD14-0003-30_31_32-1;4;4-M3I35-0.279GF-QLAND_01.15sec	ZT80133_Hisp	3	-12.7212	-2.95935	279	1;4;4	-9.7619	9.7619	I35
B08_RD14-0003-49_50_29-1;4;1-M4a-0.09GF-Q0.5_02.15sec	GT38092_Cauc	3	-9.80688	-0.0563844	90	1;4;1	-9.75049	9.75049	a
D01_RD14-0003-40_41_42_43-1;1;1;1-M3a-0.124GF-Q0.9_04.15sec	MT95371_AA	4	-9.6968	0.0407266	124	1;1;1;1	-9.73753	9.73753	a
E11_RD14-0003-48_49_50_29-1;4;4;4-M2e-0.5GF-Q1.3_05.15sec	C97H_Hisp	4	-9.63451	-0.019688	500	1;4;4;4	-9.61482	9.61482	e
H02_RD14-0003-50_29_30_31-1;1;2;1-M2e-0.155GF-Q1.0_08.15sec	PT83535_Cauc	4	-10.4248	-0.84818	155	1;1;2;1	-9.57663	9.57663	e
A04_RD14-0003-41_42_43-1;9;1-M2c-0.341GF-Q1.1_01.15sec	C77A_Asian	3	-13.8962	-4.35969	341	1;9;1	-9.53651	9.53651	c
D06_RD14-0003-49_50_29-1;4;1-M4I22-0.186GF-Q2.1_04.15sec	ZT79874_Hisp	3	-9.85078	-0.356378	186	1;4;1	-9.4944	9.4944	I22
C04_RD14-0003-36_37_38_39-1;2;2;1-M1S30-0.75GF-Q2.6_03.15sec	C08C_Cauc	4	-9.49214	-0.00687794	750	1;2;2;1	-9.48527	9.48527	S30
D02_RD14-0003-36_37_38-1;2;1-M3d-0.124GF-Q0.9_04.15sec	WT51342_Cauc	3	-10.8447	-1.59419	124	1;2;1	-9.25047	9.25047	d
F03_RD14-0003-32_33_34_35-1;1;9;1-M2a-0.18GF-Q0.5_06.15sec	ZT80427_Hisp	4	-9.44491	-0.206163	180	1;1;9;1	-9.23874	9.23874	a
C03_RD14-0003-44_45_46_47-1;1;4;1-M3I35-0.217GF-QLAND_03.15sec	GT37607_Hisp	4	-9.23433	-0.019709	217	1;1;4;1	-9.21462	9.21462	I35
E10_RD14-0003-39_40-1;2-M3c-0.093GF-Q1.0_05.15sec	MT95114_AA	2	-16.684	-7.47184	93	1;2	-9.21219	9.21219	c
E01_RD14-0003-40_41_42_43-1;1;1;1-M4I22-0.252GF-Q3.5_05.15sec	PT83902_AA	4	-9.18709	-0.000329231	252	1;1;1;1	-9.18676	9.18676	I22
D06_RD14-0003-44_45_46-1;2;2-M3c-0.155GF-Q0.9_04.15sec	C56B_AA	3	-10.9393	-1.75873	155	1;2;2	-9.18058	9.18058	c
E06_RD14-0003-49_50_29-1;4;1-M4I22-0.09GF-Q2.1_05.15sec	C23A_Asian	3	-9.06449	0.000378361	90	1;4;1	-9.06487	9.06487	I22
E05_RD14-0003-46_47_48-1;1;1-M3I35-0.189GF-QLAND_05.15sec	GT36866_Cauc	3	-18.5421	-9.51117	189	1;1;1	-9.03095	9.03095	I35
C07_RD14-0003-46_47_48-1;1;1-M2e-0.189GF-Q1.0_03.15sec	UT58317_Cauc	3	-14.6308	-5.61873	189	1;1;1	-9.01206	9.01206	e
H07_RD14-0003-37_38_39_40-1;9;9;1-M2a-0.62GF-Q0.4_08.15sec	MT95368_AA	4	-10.8097	-1.8392	620	1;9;9;1	-8.97047	8.97047	a
B05_RD14-0003-46_47_48-1;1;1-M4U15-0.045GF-Q1.1_02.15sec	TT51682_Cauc	3	-11.1415	-2.18737	45	1;1;1	-8.95409	8.95409	U15
E02_RD14-0003-40_41-1;4-M4U15-0.075GF-Q1.8_05.15sec	ZT81382_Cauc	2	-15.1739	-6.22642	75	1;4	-8.9475	8.9475	U15
E11_RD14-0003-48_49_50_29-1;4;4;4-M2e-0.5GF-Q1.3_05.15sec	MT95368_AA	4	-9.17263	-0.232037	500	1;4;4;4	-8.94059	8.94059	e
H02_RD14-0003-44_45_46_47-1;1;4;1-M3a-0.217GF-Q0.8_08.15sec	C46C_Cauc	4	-9.27084	-0.337758	217	1;1;4;1	-8.93308	8.93308	a
F05_RD14-0003-42_43-1;9-M2e-0.31GF-Q2.5_06.15sec	Y33_AA	2	-10.6968	-1.76811	310	1;9	-8.92869	8.92869	e
F03_RD14-0003-32_33_34_35-1;1;9;1-M2a-0.18GF-Q0.5_06.15sec	C04C_Cauc	4	-9.11295	-0.212779	180	1;1;9;1	-8.90017	8.90017	a
E06_RD14-0003-46_47_48-1;1;1-M4a-0.045GF-Q0.3_05.15sec	ZT80334_Hisp	3	-12.618	-3.7225	45	1;1;1	-8.89548	8.89548	a
B07_RD14-0003-33_34_35_36-1;4;4;1-M1e-0.31GF-Q1.2_02.15sec	C95C_Cauc	4	-9.65365	-0.766095	310	1;4;4;1	-8.88755	8.88755	e
B05_RD14-0003-42_43-1;9-M2d-0.15GF-Q0.8_02.15sec	ZT80090_Hisp	2	-13.2782	-4.45591	150	1;9	-8.82228	8.82228	d
A08_RD14-0003-30_31_32-1;4;4-M3I35-0.279GF-QLAND_01.15sec	C27A_Asian	3	-11.6925	-2.92246	279	1;4;4	-8.77004	8.77004	I35
H06_RD14-0003-44_45_46-1;2;2-M2d-0.155GF-Q1.8_08.15sec	GT37864_Hisp	3	-12.083	-3.31854	155	1;2;2	-8.76448	8.76448	d
H05_RD14-0003-46_47_48-1;1;1-M2U105-0.093GF-Q4.6_08.15sec	UT57287_Cauc	3	-10.6308	-1.87476	93	1;1;1	-8.75603	8.75603	U105
D06_RD14-0003-49_50_29-1;4;1-M3U15-0.09GF-Q1.0_04.15sec	C04Ba_AA	3	-9.26201	-0.51254	90	1;4;1	-8.74947	8.74947	U15
C07_RD14-0003-30_31_32-1;4;4-M4I15-0.135GF-Q1.4_03.15sec	PT83909_AA	3	-10.821	-2.13698	135	1;4;4	-8.68404	8.68404	I15
H02_RD14-0003-40_41-1;4-M4I22-0.075GF-Q2.0_08.15sec	OT07803_Cauc	2	-13.3098	-4.63938	75	1;4	-8.67042	8.67042	I22
E06_RD14-0003-49_50_29-1;4;1-M4I22-0.09GF-Q2.1_05.15sec	C97C_Cauc	3	-8.66555	0.000480461	90	1;4;1	-8.66603	8.66603	I22
F07_RD14-0003-30_31_32-1;4;4-M4I22-0.279GF-Q4.7_06.15sec	OT05603_AA	3	-13.262	-4.62787	279	1;4;4	-8.63415	8.63415	I22
B11_RD14-0003-39_40-1;2-M3d-0.045GF-Q1.5_02.15sec	MT95855_Hisp	2	-13.8508	-5.24252	45	1;2	-8.60826	8.60826	d
G05_RD14-0003-46_47_48-1;1;1-M4I35-0.045GF-QLAND_07.15sec	C62H_Hisp	3	-8.98716	-0.384899	45	1;1;1	-8.60226	8.60226	I35
G09_RD14-0003-30_31_32-1;4;4-M3a-0.135GF-Q0.5_07.15sec	Y18_AA	3	-10.3391	-1.77692	135	1;4;4	-8.56221	8.56221	a
H04_RD14-0003-32_33_34_35-1;1;9;1-M1e-0.5GF-Q0.7_08.15sec	GT37483_Hisp	4	-9.58336	-1.02729	500	1;1;9;1	-8.55607	8.55607	e
D06_RD14-0003-44_45_46-1;2;2-M3c-0.155GF-Q0.9_04.15sec	C05H_Hisp	3	-10.0762	-1.53741	155	1;2;2	-8.53883	8.53883	c
F07_RD14-0003-30_31_32-1;4;4-M4I22-0.279GF-Q4.7_06.15sec	UA16918_Cauc	3	-13.2899	-4.75124	279	1;4;4	-8.53864	8.53864	I22
H01_RD14-0003-40_41_42_43-1;1;1;1-M4I35-0.252GF-QLAND_08.15sec	C09A_Asian	4	-8.52578	-0.000421615	252	1;1;1;1	-8.52536	8.52536	I35
H08_RD14-0003-49_50_29-1;4;1-M2e-0.378GF-Q1.4_08.15sec	C46A_Asian	3	-9.66555	-1.1421	378	1;4;1	-8.52345	8.52345	e
H01_RD14-0003-40_41_42_43-1;1;1;1-M4I35-0.252GF-QLAND_08.15sec	PT83883_AA	4	-8.48812	0.0242402	252	1;1;1;1	-8.51236	8.51236	I35
E04_RD14-0003-36_37_38_39-1;2;2;1-M3a-0.186GF-Q0.7_05.15sec	TT51407_Hisp	4	-8.97881	-0.480671	186	1;2;2;1	-8.49814	8.49814	a
D01_RD14-0003-44_45-1;1-M4U15-0.03GF-Q1.3_04.15sec	ZT81382_Cauc	2	-11.3335	-2.84346	30	1;1	-8.49002	8.49002	U15
E02_RD14-0003-44_45-1;1-M4e-0.031GF-Q1.3_05.15sec	UT57299_Cauc	2	-12.0814	-3.68897	31	1;1	-8.39248	8.39248	e
G07_RD14-0003-30_31_32-1;4;4-M4I22-0.135GF-Q4.7_07.15sec	GT38078_Cauc	3	-9.63078	-1.23853	135	1;4;4	-8.39225	8.39225	I22
A02_RD14-0003-50_29_30_31-1;1;2;1-M3c-0.075GF-Q0.5_01.15sec	UT57312_Cauc	4	-9.03527	-0.70197	75	1;1;2;1	-8.3333	8.3333	c
B04_RD14-0003-48_49_50_29-1;4;4;4-M3I22-0.195GF-Q1.7_02.15sec	GT38086_Cauc	4	-8.31966	0.000195805	195	1;4;4;4	-8.31986	8.31986	I22
C04_RD14-0003-36_37_38_39-1;2;2;1-M1S30-0.75GF-Q2.6_03.15sec	C44C_Cauc	4	-10.9666	-2.65301	750	1;2;2;1	-8.31357	8.31357	S30
A06_RD14-0003-44_45_46-1;2;2-M3a-0.075GF-Q0.6_01.15sec	PT83868_AA	3	-8.31158	-0.0705257	75	1;2;2	-8.24105	8.24105	a
F10_RD14-0003-36_37_38-1;2;1-M3c-0.124GF-Q0.9_06.15sec	UT58337_Cauc	3	-8.6517	-0.41748	124	1;2;1	-8.23422	8.23422	c
A04_RD14-0003-48_49_50_29-1;4;4;4-M3I22-0.403GF-Q1.7_01.15sec	MT94853_Cauc	4	-8.03527	0.193124	403	1;4;4;4	-8.22839	8.22839	I22
C01_RD14-0003-44_45-1;1-M3U15-0.062GF-Q0.9_03.15sec	C96B_AA	2	-23.082	-15.0356	62	1;1	-8.04633	8.04633	U15
H01_RD14-0003-40_41_42_43-1;1;1;1-M2U105-0.252GF-Q12_08.15sec	UT58295_Cauc	4	-8.63827	-0.598369	252	1;1;1;1	-8.0399	8.0399	U105
G03_RD14-0003-48_49_50_29-1;4;4;4-M3U15-0.195GF-Q1.5_07.15sec	C62H_Hisp	4	-8.0381	0.000103832	195	1;4;4;4	-8.03821	8.03821	U15
E01_RD14-0003-40_41_42_43-1;1;1;1-M4I22-0.252GF-Q3.5_05.15sec	C83B_AA	4	-8.02228	-8.40596e-06	252	1;1;1;1	-8.02227	8.02227	I22
A08_RD14-0003-30_31_32-1;4;4-M2U60-0.135GF-Q2.7_01.15sec	OT05589_AA	3	-10.7747	-2.75471	135	1;4;4	-8.01998	8.01998	U60
G03_RD14-0003-41_42_43-1;9;1-M2c-0.693GF-Q1.1_07.15sec	C16C_Cauc	3	-8.29073	-0.29345	693	1;9;1	-7.99728	7.99728	c
G07_RD14-0003-30_31_32-1;4;4-M4I22-0.135GF-Q4.7_07.15sec	C101A_Asian	3	-8.92082	-0.952222	135	1;4;4	-7.9686	7.9686	I22
A05_RD14-0003-32_33_34_35-1;1;9;1-M2e-0.372GF-Q0.6_01.15sec	MT95095_AA	4	-9.61439	-1.67667	372	1;1;9;1	-7.93772	7.93772	e
C03_RD14-0003-44_45_46_47-1;1;4;1-M3I35-0.217GF-QLAND_03.15sec	C100B_AA	4	-8.07469	-0.147185	217	1;1;4;1	-7.9275	7.9275	I35
H01_RD14-0003-50_29_30_31-1;1;2;1-M2c-0.155GF-Q0.6_08.15sec	C77A_Asian	4	-9.68825	-1.83093	155	1;1;2;1	-7.85732	7.85732	c
H06_RD14-0003-44_45_46-1;2;2-M2d-0.155GF-Q1.8_08.15sec	UT57287_Cauc	3	-10.5376	-2.68067	155	1;2;2	-7.85693	7.85693	d
H04_RD14-0003-32_33_34_35-1;1;9;1-M1e-0.5GF-Q0.7_08.15sec	OT05591_AA	4	-9.09098	-1.23696	500	1;1;9;1	-7.85402	7.85402	e
H04_RD14-0003-40_41_42_43-1;1;1;1-M2S10-0.252GF-Q1.3_08.15sec	C13A_Asian	4	-9.4698	-1.61741	252	1;1;1;1	-7.85239	7.85239	S10
B07_RD14-0003-30_31_32-1;4;4-M3I15-0.279GF-Q1.1_02.15sec	C74A_Asian	3	-9.88606	-2.03379	279	1;4;4	-7.85226	7.85226	I15
H03_RD14-0003-41_42_43-1;9;1-M2c-0.5GF-Q1.1_08.15sec	C90B_AA	3	-10.0991	-2.27434	500	1;9;1	-7.82475	7.82475	c
D09_RD14-0003-47_48_49-1;9;9-M1e-0.589GF-Q2.2_04.15sec	WT52472_Cauc	3	-10.6946	-2.8731	589	1;9;9	-7.82155	7.82155	e
B08_RD14-0003-47_48_49-1;9;9-M2a-0.285GF-Q0.7_02.15sec	WT52485_Cauc	3	-15.9957	-8.25389	285	1;9;9	-7.74179	7.74179	a
E02_RD14-0003-40_41-1;4-M4I15-0.075GF-Q1.0_05.15sec	C49B_AA	2	-14.8894	-7.1923	75	1;4	-7.69711	7.69711	I15
C10_RD14-0003-30_31_32-1;4;4-M3d-0.135GF-Q0.8_03.15sec	C89C_Cauc	3	-10.719	-3.04592	135	1;4;4	-7.67305	7.67305	d
G03_RD14-0003-48_49_50_29-1;4;4;4-M3I15-0.195GF-Q1.1_07.15sec	C03A_Asian	4	-7.66154	-0.000149387	195	1;4;4;4	-7.66139	7.66139	I15
D06_RD14-0003-49_50_29-1;4;1-M3U15-0.09GF-Q1.0_04.15sec	GT37869_Hisp	3	-8.85699	-1.22489	90	1;4;1	-7.6321	7.6321	U15
H02_RD14-0003-50_29_30_31-1;1;2;1-M2e-0.155GF-Q1.0_08.15sec	WT51342_Cauc	4	-8.4698	-0.849668	155	1;1;2;1	-7.62013	7.62013	e
E11_RD14-0003-48_49_50_29-1;4;4;4-M2e-0.5GF-Q1.3_05.15sec	MT94850_Cauc	4	-7.73283	-0.11352	500	1;4;4;4	-7.61931	7.61931	e
F05_RD14-0003-46_47_48-1;1;1-M4I35-0.093GF-QLAND_06.15sec	C15H_Hisp	3	-10.7447	-3.15545	93	1;1;1	-7.58928	7.58928	I35
B02_RD14-0003-44_45-1;1-M4I35-0.03GF-QLAND_02.15sec	UT57287_Cauc	2	-8.92082	-1.33839	30	1;1	-7.58243	7.58243	I35
E10_RD14-0003-30_31_32-1;4;4-M2e-0.567GF-Q1.0_05.15sec	GT37047_AA	3	-9.23433	-1.6712	567	1;4;4	-7.56314	7.56314	e
F02_RD14-0003-44_45_46_47-1;1;4;1-M3I22-0.441GF-Q1.9_06.15sec	GT37900_Hisp	4	-8.31515	-0.788145	441	1;1;4;1	-7.52701	7.52701	I22
D08_RD14-0003-30_31_32-1;4;4-M2U105-0.135GF-Q5.1_04.15sec	C11B_AA	3	-10.2083	-2.70083	135	1;4;4	-7.50748	7.50748	U105
F06_RD14-0003-49_50_29-1;4;1-M2U60-0.186GF-Q3.8_06.15sec	C19H_Hisp	3	-8.10624	-0.616511	186	1;4;1	-7.48973	7.48973	U60
G05_RD14-0003-42_43-1;9-M2e-0.15GF-Q2.5_07.15sec	C93H_Hisp	2	-8.06601	-0.581887	150	1;9	-7.48412	7.48412	e
G02_RD14-0003-44_45_46_47-1;1;4;1-M3I22-0.217GF-Q1.9_07.15sec	MT94829_Cauc	4	-7.47756	-0.00235591	217	1;1;4;1	-7.4752	7.4752	I22
A02_RD14-0003-40_41_42_43-1;1;1;1-M4I35-0.124GF-QLAND_01.15sec	MT97155_Cauc	4	-7.43533	-9.36958e-05	124	1;1;1;1	-7.43524	7.43524	I35
H08_RD14-0003-47_48_49-1;9;9-M2d-0.589GF-Q1.4_08.15sec	C68A_Asian	3	-10.4609	-3.03905	589	1;9;9	-7.42188	7.42188	d
A06_RD14-0003-44_45_46-1;2;2-M3a-0.075GF-Q0.6_01.15sec	ZT79319_AA	3	-6.84771	0.53789	75	1;2;2	-7.3856	7.3856	a
D11_RD14-0003-48_49_50_29-1;4;4;4-M1e-0.75GF-Q1.1_04.15sec	MT97145_Cauc	4	-10.4895	-3.13764	750	1;4;4;4	-7.35182	7.35182	e
G09_RD14-0003-30_31_32-1;4;4-M3a-0.135GF-Q0.5_07.15sec	C87C_Cauc	3	-9.23508	-1.89967	135	1;4;4	-7.33541	7.33541	a
G09_RD14-0003-47_48_49-1;9;9-M2e-0.285GF-Q1.5_07.15sec	JT51494_AA	3	-9.57675	-2.25476	285	1;9;9	-7.32199	7.32199	e
C02_RD14-0003-44_45_46_47-1;1;4;1-M2U15-0.441GF-Q1.1_03.15sec	C98C_Cauc	4	-8.2161	-0.956552	441	1;1;4;1	-7.25954	7.25954	U15
B05_RD14-0003-46_47_48-1;1;1-M4U15-0.045GF-Q1.1_02.15sec	WT51362_Cauc	3	-8.87943	-1.62882	45	1;1;1	-7.25061	7.25061	U15
D02_RD14-0003-44_45_46_47-1;1;4;1-M3I15-0.217GF-Q1.1_04.15sec	C17A_Asian	4	-7.44249	-0.227587	217	1;1;4;1	-7.21491	7.21491	I15
H05_RD14-0003-46_47_48-1;1;1-M2U105-0.093GF-Q4.6_08.15sec	UT58301_Cauc	3	-9.13608	-1.92509	93	1;1;1	-7.21099	7.21099	U105
F05_RD14-0003-33_34_35_36-1;4;4;1-M2a-0.31GF-Q0.5_06.15sec	UT58319_Cauc	4	-8.31336	-1.13677	310	1;4;4;1	-7.17659	7.17659	a
C07_RD14-0003-44_45_46-1;2;2-M2e-0.305GF-Q2.9_03.15sec	GT38087_Cauc	3	-9.18376	-2.01569	305	1;2;2	-7.16807	7.16807	e
E04_RD14-0003-36_37_38_39-1;2;2;1-M3a-0.186GF-Q0.7_05.15sec	ZT80255_Hisp	4	-7.66959	-0.511048	186	1;2;2;1	-7.15854	7.15854	a
G05_RD14-0003-33_34_35_36-1;4;4;1-M2a-0.15GF-Q0.5_07.15sec	JT51481_AA	4	-7.14086	0.000203132	150	1;4;4;1	-7.14106	7.14106	a
A05_RD14-0003-32_33_34_35-1;1;9;1-M2e-0.372GF-Q0.6_01.15sec	PT84243_AA	4	-8.84164	-1.70409	372	1;1;9;1	-7.13754	7.13754	e
A04_RD14-0003-48_49_50_29-1;4;4;4-M2U60-0.403GF-Q4.9_01.15sec	Y18_AA	4	-7.12843	-5.43768e-06	403	1;4;4;4	-7.12842	7.12842	U60
E06_RD14-0003-46_47_48-1;1;1-M4a-0.045GF-Q0.3_05.15sec	C80H_Hisp	3	-10.7905	-3.69419	45	1;1;1	-7.09629	7.09629	a
B02_RD14-0003-44_45-1;1-M4I35-0.03GF-QLAND_02.15sec	WT52493_Cauc	2	-6.31069	0.780902	30	1;1	-7.09159	7.09159	I35
F02_RD14-0003-31_32-1;1-M1e-0.126GF-Q14.4_06.15sec	C12H_Hisp	2	-15.4935	-8.40645	126	1;1	-7.08704	7.08704	e
H11_RD14-0003-48_49_50_29-1;4;4;4-M2e-0.195GF-Q1.3_08.15sec	ZT79618_AA	4	-7.15927	-0.0722363	195	1;4;4;4	-7.08703	7.08703	e
H08_RD14-0003-49_50_29-1;4;1-M2e-0.378GF-Q1.4_08.15sec	WT52470_Cauc	3	-7.37059	-0.289148	378	1;4;1	-7.08144	7.08144	e
A07_RD14-0003-44_45_46-1;2;2-M2d-0.075GF-Q1.8_01.15sec	C45C_Cauc	3	-8.57187	-1.5644	75	1;2;2	-7.00746	7.00746	d
D09_RD14-0003-47_48_49-1;9;9-M1e-0.589GF-Q2.2_04.15sec	C58A_Asian	3	-11.3279	-4.37631	589	1;9;9	-6.95159	6.95159	e
D09_RD14-0003-47_48_49-1;9;9-M1e-0.589GF-Q2.2_04.15sec	JT51485_AA	3	-10.8356	-3.89588	589	1;9;9	-6.93977	6.93977	e
D04_RD14-0003-41_42_43-1;9;1-M2d-0.5GF-Q1.2_04.15sec	PT83895_AA	3	-8.02411	-1.10398	500	1;9;1	-6.92012	6.92012	d
B04_RD14-0003-40_41-1;4-M4e-0.075GF-Q0.7_02.15sec	PT84179_AA	2	-11.0625	-4.16461	75	1;4	-6.89788	6.89788	e
F06_RD14-0003-49_50_29-1;4;1-M2U60-0.186GF-Q3.8_06.15sec	C27C_Cauc	3	-7.55129	-0.673647	186	1;4;1	-6.87765	6.87765	U60
H06_RD14-0003-44_45_46-1;2;2-M2d-0.155GF-Q1.8_08.15sec	ZT79907_Hisp	3	-9.97062	-3.09908	155	1;2;2	-6.87154	6.87154	d
G03_RD14-0003-48_49_50_29-1;4;4;4-M3U15-0.195GF-Q1.5_07.15sec	PT83919_AA	4	-6.85387	0.000145454	195	1;4;4;4	-6.85402	6.85402	U15
C02_RD14-0003-44_45_46_47-1;1;4;1-M2U15-0.441GF-Q1.1_03.15sec	GT38091_Cauc	4	-7.89963	-1.08598	441	1;1;4;1	-6.81365	6.81365	U15
H02_RD14-0003-40_41-1;4-M4I22-0.075GF-Q2.0_08.15sec	PT84386_Hisp	2	-10.5544	-3.75678	75	1;4	-6.79761	6.79761	I22
G03_RD14-0003-42_43-1;9-M3I15-0.15GF-Q1.2_07.15sec	PC16856_Asian	2	-20.6038	-13.81	150	1;9	-6.79383	6.79383	I15
G03_RD14-0003-41_42_43-1;9;1-M2c-0.693GF-Q1.1_07.15sec	ZC08763_Hisp	3	-7.42597	-0.68088	693	1;9;1	-6.74509	6.74509	c
E02_RD14-0003-44_45-1;1-M4e-0.031GF-Q1.3_05.15sec	C04H_Hisp	2	-12.1643	-5.42607	31	1;1	-6.73824	6.73824	e
H01_RD14-0003-40_41_42_43-1;1;1;1-M4I35-0.252GF-QLAND_08.15sec	C05C_Cauc	4	-6.72816	-0.000507076	252	1;1;1;1	-6.72765	6.72765	I35
E06_RD14-0003-49_50_29-1;4;1-M4I22-0.09GF-Q2.1_05.15sec	OT05896_AA	3	-6.7122	0.000618085	90	1;4;1	-6.71282	6.71282	I22
H08_RD14-0003-49_50_29-1;4;1-M2e-0.378GF-Q1.4_08.15sec	UA16918_Cauc	3	-8.24185	-1.54559	378	1;4;1	-6.69625	6.69625	e
F03_RD14-0003-32_33_34_35-1;1;9;1-M2a-0.18GF-Q0.5_06.15sec	OT05588_AA	4	-6.88273	-0.192446	180	1;1;9;1	-6.69028	6.69028	a
G07_RD14-0003-30_31_32-1;4;4-M4I22-0.135GF-Q4.7_07.15sec	C07C_Cauc	3	-7.91009	-1.23118	135	1;4;4	-6.67891	6.67891	I22
A04_RD14-0003-30_31_32-1;4;4-M1S30-0.279GF-Q3.2_01.15sec	MT95087_AA	3	-10.8665	-4.19181	279	1;4;4	-6.67465	6.67465	S30
H06_RD14-0003-49_50_29-1;4;1-M4I35-0.09GF-QLAND_08.15sec	ZT79338_AA	3	-6.67366	-0.000266982	90	1;4;1	-6.6734	6.6734	I35
A08_RD14-0003-30_31_32-1;4;4-M2U60-0.135GF-Q2.7_01.15sec	MT94868_Cauc	3	-8.04818	-1.39795	135	1;4;4	-6.65023	6.65023	U60
A04_RD14-0003-30_31_32-1;4;4-M1S30-0.279GF-Q3.2_01.15sec	UT58320_Cauc	3	-12.7595	-6.12381	279	1;4;4	-6.63564	6.63564	S30
B08_RD14-0003-30_31_32-1;4;4-M3I35-0.135GF-QLAND_02.15sec	OT07767_Cauc	3	-8.8962	-2.31397	135	1;4;4	-6.58222	6.58222	I35
E05_RD14-0003-36_37_38_39-1;2;2;1-M2e-0.378GF-Q1.2_05.15sec	OT05594_AA	4	-7.36653	-0.812948	378	1;2;2;1	-6.55358	6.55358	e
G08_RD14-0003-47_48_49-1;9;9-M2d-0.75GF-Q1.4_07.15sec	C28C_Cauc	3	-9.65365	-3.1451	750	1;9;9	-6.50855	6.50855	d
B08_RD14-0003-47_48_49-1;9;9-M2a-0.285GF-Q0.7_02.15sec	C22A_Asian	3	-13.0057	-6.52263	285	1;9;9	-6.48305	6.48305	a
H06_RD14-0003-49_50_29-1;4;1-M4I35-0.09GF-QLAND_08.15sec	OT05901_AA	3	-6.44977	0.000684747	90	1;4;1	-6.45046	6.45046	I35
E04_RD14-0003-48_49_50_29-1;4;4;4-M4I35-0.195GF-Q78.7_05.15sec	C65B_AA	4	-6.41794	9.39e-06	195	1;4;4;4	-6.41795	6.41795	I35
H08_RD14-0003-47_48_49-1;9;9-M2d-0.589GF-Q1.4_08.15sec	UA16895_Cauc	3	-9.25337	-2.84015	589	1;9;9	-6.41321	6.41321	d
H04_RD14-0003-40_41_42_43-1;1;1;1-M2S10-0.252GF-Q1.3_08.15sec	C61B_AA	4	-6.67162	-0.308445	252	1;1;1;1	-6.36318	6.36318	S10
H04_RD14-0003-41_42_43-1;9;1-M2e-0.52GF-Q1.7_08.15sec	JT52346_Cauc	3	-5.6968	-0.234506	520	1;9;1	-5.4623	5.4623	e
B09_RD14-0003-37_38_39_40-1;9;9;1-M2d-0.3GF-Q0.7_02.15sec	GT37862_Hisp	4	-7.52143	-1.19896	300	1;9;9;1	-6.32247	6.32247	d
H01_RD14-0003-40_41_42_43-1;1;1;1-M2U105-0.252GF-Q12_08.15sec	C62H_Hisp	4	-6.92812	-0.612783	252	1;1;1;1	-6.31533	6.31533	U105
G03_RD14-0003-48_49_50_29-1;4;4;4-M3U15-0.195GF-Q1.5_07.15sec	C23C_Cauc	4	-6.31426	0.000339637	195	1;4;4;4	-6.3146	6.3146	U15
H08_RD14-0003-47_48_49-1;9;9-M2d-0.589GF-Q1.4_08.15sec	ZT79907_Hisp	3	-9.16813	-2.8758	589	1;9;9	-6.29233	6.29233	d
E02_RD14-0003-42_43-1;9-M2S10-0.15GF-Q1.0_05.15sec	ZT79340_AA	2	-10.0182	-3.74458	150	1;9	-6.2736	6.2736	S10
H11_RD14-0003-48_49_50_29-1;4;4;4-M2e-0.195GF-Q1.3_08.15sec	GT38092_Cauc	4	-6.32057	-0.0716144	195	1;4;4;4	-6.24896	6.24896	e
A05_RD14-0003-36_37_38_39-1;2;2;1-M3d-0.186GF-Q1.2_01.15sec	GT38066_Cauc	4	-6.23433	0.000536633	186	1;2;2;1	-6.23487	6.23487	d
D02_RD14-0003-44_45_46_47-1;1;4;1-M3I15-0.217GF-Q1.1_04.15sec	WT51381_Cauc	4	-6.45967	-0.233717	217	1;1;4;1	-6.22595	6.22595	I15
D04_RD14-0003-36_37_38_39-1;2;2;1-M2a-0.378GF-Q0.7_04.15sec	C71C_Cauc	4	-8.31966	-2.12549	378	1;2;2;1	-6.19418	6.19418	a
C02_RD14-0003-44_45_46_47-1;1;4;1-M3I15-0.441GF-Q1.1_03.15sec	C63B_AA	4	-6.84771	-0.671775	441	1;1;4;1	-6.17594	6.17594	I15
D08_RD14-0003-30_31_32-1;4;4-M2U105-0.135GF-Q5.1_04.15sec	C42A_Asian	3	-8.75696	-2.59897	135	1;4;4	-6.15799	6.15799	U105
B06_RD14-0003-49_50_29-1;4;1-M4I15-0.09GF-Q0.9_02.15sec	C19B_AA	3	-6.1512	0.000458226	90	1;4;1	-6.15165	6.15165	I15
C09_RD14-0003-47_48_49-1;9;9-M1e-0.75GF-Q2.2_03.15sec	ZT80682_Hisp	3	-11.1029	-4.97809	750	1;9;9	-6.12483	6.12483	e
D01_RD14-0003-40_41_42_43-1;1;1;1-M3a-0.124GF-Q0.9_04.15sec	PT83863_AA	4	-5.96658	0.146977	124	1;1;1;1	-6.11355	6.11355	a
A05_RD14-0003-33_34-1;2-M4e-0.045GF-Q3.2_01.15sec	C99H_Hisp	2	-8.19111	-2.14658	45	1;2	-6.04453	6.04453	e
B11_RD14-0003-39_40-1;2-M3d-0.045GF-Q1.5_02.15sec	ZT80782_Hisp	2	-10.5143	-4.48715	45	1;2	-6.02713	6.02713	d
E04_RD14-0003-36_37_38_39-1;2;2;1-M3a-0.186GF-Q0.7_05.15sec	C95A_Asian	4	-6.53018	-0.505262	186	1;2;2;1	-6.02492	6.02492	a
E04_RD14-0003-41_42_43-1;9;1-M2d-0.341GF-Q1.2_05.15sec	ZT80427_Hisp	3	-6.60033	-0.628115	341	1;9;1	-5.97221	5.97221	d
F05_RD14-0003-42_43-1;9-M2e-0.31GF-Q2.5_06.15sec	MT94826_Cauc	2	-8.09854	-2.15905	310	1;9	-5.93949	5.93949	e
H02_RD14-0003-44_45_46_47-1;1;4;1-M3a-0.217GF-Q0.8_08.15sec	OT05575_AA	4	-6.27901	-0.355566	217	1;1;4;1	-5.92345	5.92345	a
B08_RD14-0003-47_48_49-1;9;9-M2a-0.285GF-Q0.7_02.15sec	OT05594_AA	3	-13.0146	-7.09146	285	1;9;9	-5.92311	5.92311	a
D04_RD14-0003-36_37_38_39-1;2;2;1-M2a-0.378GF-Q0.7_04.15sec	Y25_Hisp	4	-6.4389	-0.52498	378	1;2;2;1	-5.91392	5.91392	a
E04_RD14-0003-41_42_43-1;9;1-M2d-0.341GF-Q1.2_05.15sec	C25A_Asian	3	-6.58336	-0.728267	341	1;9;1	-5.85509	5.85509	d
E01_RD14-0003-50_29_30_31-1;1;2;1-M3a-0.075GF-Q0.5_05.15sec	PC16856_Asian	4	-6.61439	-0.759856	75	1;1;2;1	-5.85454	5.85454	a
B04_RD14-0003-48_49_50_29-1;4;4;4-M3I22-0.195GF-Q1.7_02.15sec	MT94815_Cauc	4	-5.81816	0.000112414	195	1;4;4;4	-5.81827	5.81827	I22
G02_RD14-0003-44_45_46_47-1;1;4;1-M3I22-0.217GF-Q1.9_07.15sec	C47H_Hisp	4	-5.68825	0.12176	217	1;1;4;1	-5.81001	5.81001	I22
G10_RD14-0003-30_31_32-1;4;4-M2e-0.135GF-Q1.0_07.15sec	C76H_Hisp	3	-6.33348	-0.526655	135	1;4;4	-5.80683	5.80683	e
C01_RD14-0003-40_41_42_43-1;1;1;1-M4I15-0.124GF-Q1.6_03.15sec	PT83535_Cauc	4	-5.77728	0.000196883	124	1;1;1;1	-5.77748	5.77748	I15
E03_RD14-0003-49_50_29-1;4;1-M2S30-0.186GF-Q2.7_05.15sec	C32H_Hisp	3	-5.85387	-0.132242	186	1;4;1	-5.72163	5.72163	S30
H04_RD14-0003-41_42_43-1;9;1-M2e-0.52GF-Q1.7_08.15sec	MT94877_Cauc	3	-5.9431	-0.229372	520	1;9;1	-5.71372	5.71372	e
C04_RD14-0003-36_37_38_39-1;2;2;1-M1S30-0.75GF-Q2.6_03.15sec	C94H_Hisp	4	-8.35067	-2.65502	750	1;2;2;1	-5.69564	5.69564	S30
D04_RD14-0003-41_42_43-1;9;1-M2d-0.5GF-Q1.2_04.15sec	ZT80682_Hisp	3	-6.65956	-1.02827	500	1;9;1	-5.63128	5.63128	d
B07_RD14-0003-33_34_35_36-1;4;4;1-M1e-0.31GF-Q1.2_02.15sec	MT97187_Cauc	4	-6.48017	-0.877928	310	1;4;4;1	-5.60224	5.60224	e
A02_RD14-0003-40_41_42_43-1;1;1;1-M4I35-0.124GF-QLAND_01.15sec	C11C_Cauc	4	-5.58004	-0.00021304	124	1;1;1;1	-5.57983	5.57983	I35
C07_RD14-0003-44_45_46-1;2;2-M2e-0.305GF-Q2.9_03.15sec	MT94877_Cauc	3	-7.44612	-1.86911	305	1;2;2	-5.57701	5.57701	e
H04_RD14-0003-32_33_34_35-1;1;9;1-M1e-0.5GF-Q0.7_08.15sec	PT83895_AA	4	-6.30277	-0.746716	500	1;1;9;1	-5.55605	5.55605	e
F07_RD14-0003-30_31_32-1;4;4-M2U15-0.135GF-Q1.0_06.15sec	UT58324_Cauc	3	-9.36351	-3.80932	135	1;4;4	-5.55419	5.55419	U15
F04_RD14-0003-32_33_34_35-1;1;9;1-M2d-0.18GF-Q0.5_06.15sec	C27B_AA	4	-6.20901	-0.665875	180	1;1;9;1	-5.54314	5.54314	d
D03_RD14-0003-40_41-1;4-M4I35-0.075GF-QLAND_04.15sec	C20B_AA	2	-5.23582	0.258513	75	1;4	-5.49434	5.49434	I35
B02_RD14-0003-44_45-1;1-M3U105-0.03GF-Q5.5_02.15sec	C89B_AA	2	-6.03198	-0.581569	30	1;1	-5.45041	5.45041	U105
B09_RD14-0003-49_50_29-1;4;1-M3e-0.09GF-Q1.6_02.15sec	C09A_Asian	3	-5.92082	-0.534402	90	1;4;1	-5.38642	5.38642	e
F01_RD14-0003-40_41_42_43-1;1;1;1-M4I22-0.124GF-Q3.5_06.15sec	MT94883_Cauc	4	-5.37366	0.000654617	124	1;1;1;1	-5.37431	5.37431	I22
F10_RD14-0003-39_40-1;2-M3c-0.045GF-Q1.0_06.15sec	GT37913_Hisp	2	-6.10958	-0.760084	45	1;2	-5.34949	5.34949	c
G09_RD14-0003-47_48_49-1;9;9-M2e-0.285GF-Q1.5_07.15sec	ZT79619_AA	3	-7.68825	-2.34173	285	1;9;9	-5.34652	5.34652	e
A05_RD14-0003-40_41_42_43-1;1;1;1-M2S10-0.124GF-Q1.3_01.15sec	UT57293_Cauc	4	-5.30539	0.000349308	124	1;1;1;1	-5.30574	5.30574	S10
H03_RD14-0003-41_42_43-1;9;1-M2c-0.5GF-Q1.1_08.15sec	GT36864_Cauc	3	-7.53018	-2.25158	500	1;9;1	-5.2786	5.2786	c
G03_RD14-0003-48_49_50_29-1;4;4;4-M3U15-0.195GF-Q1.5_07.15sec	MT97189_Cauc	4	-5.27654	-0.000181685	195	1;4;4;4	-5.27636	5.27636	U15
F03_RD14-0003-32_33_34_35-1;1;9;1-M2a-0.18GF-Q0.5_06.15sec	WT51503_AA	4	-5.51999	-0.247983	180	1;1;9;1	-5.27201	5.27201	a
G10_RD14-0003-30_31_32-1;4;4-M2e-0.135GF-Q1.0_07.15sec	ZT80334_Hisp	3	-5.77211	-0.514447	135	1;4;4	-5.25767	5.25767	e
E01_RD14-0003-50_29_30_31-1;1;2;1-M3a-0.075GF-Q0.5_05.15sec	Y18_AA	4	-6.05849	-0.80774	75	1;1;2;1	-5.25075	5.25075	a
B08_RD14-0003-30_31_32-1;4;4-M3I35-0.135GF-QLAND_02.15sec	OT05894_AA	3	-7.66959	-2.42057	135	1;4;4	-5.24901	5.24901	I35
G10_RD14-0003-30_31_32-1;4;4-M2e-0.135GF-Q1.0_07.15sec	MT94877_Cauc	3	-5.66756	-0.479214	135	1;4;4	-5.18835	5.18835	e
B05_RD14-0003-46_47_48-1;1;1-M4U15-0.045GF-Q1.1_02.15sec	Y2_Cauc	3	-6.1343	-0.959843	45	1;1;1	-5.17446	5.17446	U15
A08_RD14-0003-30_31_32-1;4;4-M2U60-0.135GF-Q2.7_01.15sec	PT85499_Hisp	3	-7.54821	-2.37433	135	1;4;4	-5.17389	5.17389	U60
F10_RD14-0003-30_31_32-1;4;4-M2e-0.279GF-Q1.0_06.15sec	MT97195_Cauc	3	-10.7144	-5.56846	279	1;4;4	-5.14598	5.14598	e
H02_RD14-0003-40_41-1;4-M3U60-0.075GF-Q10.9_08.15sec	TT51689_Cauc	2	-4.91721	0.203179	75	1;4	-5.12039	5.12039	U60
D02_RD14-0003-44_45_46_47-1;1;4;1-M3I15-0.217GF-Q1.1_04.15sec	C100H_Hisp	4	-5.29499	-0.201603	217	1;1;4;1	-5.09339	5.09339	I15
E07_RD14-0003-44_45_46-1;2;2-M2e-0.155GF-Q2.9_05.15sec	ZT81014_Hisp	3	-6.49621	-1.41528	155	1;2;2	-5.08093	5.08093	e
F03_RD14-0003-41_42_43-1;9;1-M2a-0.165GF-Q0.6_06.15sec	GT38093_Cauc	3	-7.53018	-2.45858	165	1;9;1	-5.0716	5.0716	a
G02_RD14-0003-44_45_46_47-1;1;4;1-M2U60-0.217GF-Q4.3_07.15sec	PT84633_Hisp	4	-5.39794	-0.346965	217	1;1;4;1	-5.05097	5.05097	U60
C04_RD14-0003-36_37_38_39-1;2;2;1-M1S30-0.75GF-Q2.6_03.15sec	MT95600_Hisp	4	-4.77728	0.273431	750	1;2;2;1	-5.05071	5.05071	S30
B07_RD14-0003-33_34_35_36-1;4;4;1-M1e-0.31GF-Q1.2_02.15sec	MT97185_Cauc	4	-5.36957	-0.336492	310	1;4;4;1	-5.03308	5.03308	e
E05_RD14-0003-36_37_38_39-1;2;2;1-M2e-0.378GF-Q1.2_05.15sec	C43H_Hisp	4	-5.84164	-0.808575	378	1;2;2;1	-5.03306	5.03306	e
F10_RD14-0003-36_37_38-1;2;1-M3c-0.124GF-Q0.9_06.15sec	ZT80984_Hisp	3	-5.40782	-0.375989	124	1;2;1	-5.03183	5.03183	c
F10_RD14-0003-39_40-1;2-M3c-0.045GF-Q1.0_06.15sec	WT51510_AA	2	-5.80967	-0.790852	45	1;2	-5.01882	5.01882	c
C02_RD14-0003-44_45_46_47-1;1;4;1-M2U15-0.441GF-Q1.1_03.15sec	C03Ba_AA	4	-5.89279	-0.886277	441	1;1;4;1	-5.00651	5.00651	U15
A04_RD14-0003-41_42_43-1;9;1-M2c-0.341GF-Q1.1_01.15sec	C92B_AA	3	-9.5867	-4.60303	341	1;9;1	-4.98367	4.98367	c
H04_RD14-0003-40_41_42_43-1;1;1;1-M2S10-0.252GF-Q1.3_08.15sec	WA29572_Cauc	4	-6.58336	-1.61558	252	1;1;1;1	-4.96778	4.96778	S10
B04_RD14-0003-41_42_43-1;9;1-M2c-0.165GF-Q1.1_02.15sec	C15B_AA	3	-4.56864	0.396738	165	1;9;1	-4.96537	4.96537	c
C02_RD14-0003-44_45_46_47-1;1;4;1-M3I15-0.441GF-Q1.1_03.15sec	C84H_Hisp	4	-5.56067	-0.627456	441	1;1;4;1	-4.93321	4.93321	I15
E03_RD14-0003-49_50_29-1;4;1-M2S30-0.186GF-Q2.7_05.15sec	PT83887_AA	3	-5.07417	-0.15909	186	1;4;1	-4.91508	4.91508	S30
H01_RD14-0003-50_29_30_31-1;1;2;1-M2c-0.155GF-Q0.6_08.15sec	MT95855_Hisp	4	-6.49757	-1.59262	155	1;1;2;1	-4.90495	4.90495	c
D04_RD14-0003-41_42_43-1;9;1-M2d-0.5GF-Q1.2_04.15sec	C19C_Cauc	3	-5.25806	-0.364405	500	1;9;1	-4.89366	4.89366	d
F07_RD14-0003-30_31_32-1;4;4-M2U15-0.135GF-Q1.0_06.15sec	C32B_AA	3	-7.02045	-2.16358	135	1;4;4	-4.85687	4.85687	U15
F02_RD14-0003-31_32-1;1-M1e-0.126GF-Q14.4_06.15sec	TT51208_Hisp	2	-11.6216	-6.83377	126	1;1	-4.78783	4.78783	e
A05_RD14-0003-40_41_42_43-1;1;1;1-M2S10-0.124GF-Q1.3_01.15sec	WA29584_Cauc	4	-4.73755	0.0417638	124	1;1;1;1	-4.77931	4.77931	S10
A04_RD14-0003-44_45_46_47-1;1;4;1-M2e-0.217GF-Q1.5_01.15sec	JT51467_AA	4	-5.40121	-0.639757	217	1;1;4;1	-4.76145	4.76145	e
D02_RD14-0003-44_45_46_47-1;1;4;1-M3I15-0.217GF-Q1.1_04.15sec	GT37027_AA	4	-4.95078	-0.215362	217	1;1;4;1	-4.73542	4.73542	I15
G11_RD14-0003-48_49_50_29-1;4;4;4-M2e-0.403GF-Q1.3_07.15sec	PT84349_Hisp	4	-4.88273	-0.190129	403	1;4;4;4	-4.6926	4.6926	e
B04_RD14-0003-30_31_32-1;4;4-M2S30-0.135GF-Q3.8_02.15sec	MT97139_Cauc	3	-5.59688	-0.910691	135	1;4;4	-4.68619	4.68619	S30
B04_RD14-0003-32_33_34_35-1;1;9;1-M2c-0.18GF-Q0.4_02.15sec	PT83535_Cauc	4	-4.8729	-0.198456	180	1;1;9;1	-4.67444	4.67444	c
E04_RD14-0003-48_49_50_29-1;4;4;4-M4I35-0.195GF-Q78.7_05.15sec	UT58310_Cauc	4	-4.66154	2.79e-06	195	1;4;4;4	-4.66155	4.66155	I35
E03_RD14-0003-49_50_29-1;4;1-M2S30-0.186GF-Q2.7_05.15sec	ZT80245_Hisp	3	-4.73755	-0.0785619	186	1;4;1	-4.65899	4.65899	S30
H02_RD14-0003-50_29_30_31-1;1;2;1-M2e-0.155GF-Q1.0_08.15sec	C39A_Asian	4	-5.45469	-0.812358	155	1;1;2;1	-4.64234	4.64234	e
A05_RD14-0003-41_42_43-1;9;1-M2e-0.341GF-Q1.7_01.15sec	ZT79318_AA	3	-4.767	-0.175317	341	1;9;1	-4.59169	4.59169	e
H01_RD14-0003-40_41_42_43-1;1;1;1-M2U105-0.252GF-Q12_08.15sec	JT51496_AA	4	-5.02457	-0.43369	252	1;1;1;1	-4.59088	4.59088	U105
D02_RD14-0003-44_45_46_47-1;1;4;1-M2U15-0.217GF-Q1.1_04.15sec	MT94827_Cauc	4	-4.71444	-0.147068	217	1;1;4;1	-4.56737	4.56737	U15
C10_RD14-0003-30_31_32-1;4;4-M3d-0.135GF-Q0.8_03.15sec	C01H_Hisp	3	-6.15243	-1.59686	135	1;4;4	-4.55556	4.55556	d
C06_RD14-0003-33_34_35_36-1;4;4;1-M2c-0.15GF-Q0.8_03.15sec	C89C_Cauc	4	-5.81248	-1.26798	150	1;4;4;1	-4.54449	4.54449	c
H02_RD14-0003-36_37_38-1;2;1-M3e-0.124GF-Q1.6_08.15sec	C10H_Hisp	3	-4.53611	-0.000105916	124	1;2;1	-4.536	4.536	e
H04_RD14-0003-46_47_48-1;1;1-M4I15-0.045GF-Q0.8_08.15sec	C27A_Asian	3	-4.94692	-0.421302	45	1;1;1	-4.52562	4.52562	I15
A08_RD14-0003-30_31_32-1;4;4-M3I35-0.279GF-QLAND_01.15sec	GT38075_Cauc	3	-7.36957	-2.85016	279	1;4;4	-4.51941	4.51941	I35
B05_RD14-0003-42_43-1;9-M2d-0.15GF-Q0.8_02.15sec	WT51373_Cauc	2	-8.71444	-4.23305	150	1;9	-4.4814	4.4814	d
C01_RD14-0003-40_41_42_43-1;1;1;1-M4I15-0.124GF-Q1.6_03.15sec	C54H_Hisp	4	-4.44733	0.00458625	124	1;1;1;1	-4.45192	4.45192	I15
G10_RD14-0003-48_49_50_29-1;4;4;4-M3c-0.195GF-Q1.1_07.15sec	MT94859_Cauc	4	-5.90658	-1.45955	195	1;4;4;4	-4.44703	4.44703	c
D01_RD14-0003-44_45-1;1-M4I15-0.03GF-Q1.2_04.15sec	WT51381_Cauc	2	-4.42251	0.0122263	30	1;1	-4.43473	4.43473	I15
B09_RD14-0003-37_38_39_40-1;9;9;1-M2d-0.3GF-Q0.7_02.15sec	TT51422_Hisp	4	-5.46471	-1.0503	300	1;9;9;1	-4.4144	4.4144	d
A05_RD14-0003-32_33_34_35-1;1;9;1-M2e-0.372GF-Q0.6_01.15sec	C53C_Cauc	4	-6.05998	-1.65815	372	1;1;9;1	-4.40183	4.40183	e
F01_RD14-0003-40_41_42_43-1;1;1;1-M2U60-0.124GF-Q4.7_06.15sec	Y7_Cauc	4	-4.40671	-0.0167896	124	1;1;1;1	-4.38992	4.38992	U60
B05_RD14-0003-46_47_48-1;1;1-M4I22-0.093GF-Q1.4_02.15sec	GT37179_AA	3	-7.80134	-3.43203	93	1;1;1	-4.36932	4.36932	I22
G11_RD14-0003-48_49_50_29-1;4;4;4-M2e-0.403GF-Q1.3_07.15sec	JT51487_AA	4	-5.00877	-0.646369	403	1;4;4;4	-4.36241	4.36241	e
E07_RD14-0003-46_47_48-1;1;1-M3e-0.093GF-Q0.8_05.15sec	ZT81342_Cauc	3	-4.34872	0.000530259	93	1;1;1	-4.34925	4.34925	e
G10_RD14-0003-48_49_50_29-1;4;4;4-M3c-0.195GF-Q1.1_07.15sec	C95A_Asian	4	-4.46852	-0.130808	195	1;4;4;4	-4.33771	4.33771	c
E06_RD14-0003-44_45_46-1;2;2-M3c-0.075GF-Q0.9_05.15sec	GT36884_Cauc	3	-5.30803	-0.972302	75	1;2;2	-4.33573	4.33573	c
A05_RD14-0003-41_42_43-1;9;1-M2e-0.341GF-Q1.7_01.15sec	MT97196_Cauc	3	-4.50169	-0.178319	341	1;9;1	-4.32337	4.32337	e
E04_RD14-0003-41_42_43-1;9;1-M2d-0.341GF-Q1.2_05.15sec	C20C_Cauc	3	-4.97881	-0.669427	341	1;9;1	-4.30938	4.30938	d
A02_RD14-0003-40_41_42_43-1;1;1;1-M4I35-0.124GF-QLAND_01.15sec	WT51354_Cauc	4	-4.30627	0.000213759	124	1;1;1;1	-4.30649	4.30649	I35
C01_RD14-0003-40_41_42_43-1;1;1;1-M4I15-0.124GF-Q1.6_03.15sec	GT37862_Hisp	4	-4.28904	5.78641e-05	124	1;1;1;1	-4.28909	4.28909	I15
G03_RD14-0003-48_49_50_29-1;4;4;4-M3I15-0.195GF-Q1.1_07.15sec	C100H_Hisp	4	-4.09963	0.188576	195	1;4;4;4	-4.28821	4.28821	I15
H02_RD14-0003-40_41-1;4-M3U60-0.075GF-Q10.9_08.15sec	PT83881_AA	2	-7.99568	-3.7098	75	1;4	-4.28588	4.28588	U60
H01_RD14-0003-40_41_42_43-1;1;1;1-M2U105-0.252GF-Q12_08.15sec	GT37420_Hisp	4	-4.88273	-0.615743	252	1;1;1;1	-4.26699	4.26699	U105
G05_RD14-0003-46_47_48-1;1;1-M4I35-0.045GF-QLAND_07.15sec	ZT80626_Hisp	3	-4.54061	-0.303681	45	1;1;1	-4.23693	4.23693	I35
A02_RD14-0003-44_45-1;1-M4d-0.031GF-Q0.9_01.15sec	C28A_Asian	2	-4.91721	-0.680397	31	1;1	-4.23682	4.23682	d
C02_RD14-0003-44_45_46_47-1;1;4;1-M2U15-0.441GF-Q1.1_03.15sec	TT50697_Cauc	4	-5.27003	-1.07799	441	1;1;4;1	-4.19203	4.19203	U15
A08_RD14-0003-37_38_39_40-1;9;9;1-M2a-0.5GF-Q0.4_01.15sec	TT50913_AA	4	-6.67162	-2.50789	500	1;9;9;1	-4.16374	4.16374	a
A08_RD14-0003-37_38_39_40-1;9;9;1-M2a-0.5GF-Q0.4_01.15sec	TT50721_Cauc	4	-6.32239	-2.15906	500	1;9;9;1	-4.16333	4.16333	a
C02_RD14-0003-44_45_46_47-1;1;4;1-M3I15-0.441GF-Q1.1_03.15sec	PT86536_Cauc	4	-4.77989	-0.617901	441	1;1;4;1	-4.16199	4.16199	I15
G01_RD14-0003-44_45-1;1-M4U60-0.03GF-Q4.6_07.15sec	MT95371_AA	2	-9.36856	-5.21326	30	1;1	-4.1553	4.1553	U60
E11_RD14-0003-48_49_50_29-1;4;4;4-M2e-0.5GF-Q1.3_05.15sec	C29C_Cauc	4	-3.70553	0.446237	500	1;4;4;4	-4.15177	4.15177	e
E02_RD14-0003-50_29_30_31-1;1;2;1-M4d-0.075GF-Q1.2_05.15sec	Y31_Cauc	4	-4.12843	0.000114481	75	1;1;2;1	-4.12854	4.12854	d
H02_RD14-0003-31_32-1;1-M1e-0.03GF-Q14.4_08.15sec	TT51345_Hisp	2	-8.01055	-3.90321	30	1;1	-4.10734	4.10734	e
B05_RD14-0003-32_33_34_35-1;1;9;1-M2e-0.18GF-Q0.6_02.15sec	C65A_Asian	4	-4.39362	-0.295684	180	1;1;9;1	-4.09793	4.09793	e
H07_RD14-0003-37_38_39_40-1;9;9;1-M2a-0.62GF-Q0.4_08.15sec	JT51332_AA	4	-6.03527	-1.9451	620	1;9;9;1	-4.09016	4.09016	a
F04_RD14-0003-36_37_38_39-1;2;2;1-M3a-0.09GF-Q0.7_06.15sec	ZT81014_Hisp	4	-4.08513	-0.000237455	90	1;2;2;1	-4.08489	4.08489	a
C03_RD14-0003-44_45_46_47-1;1;4;1-M3I35-0.217GF-QLAND_03.15sec	GT37019_AA	4	-4.17783	-0.110846	217	1;1;4;1	-4.06699	4.06699	I35
C03_RD14-0003-44_45_46_47-1;1;4;1-M2U105-0.217GF-Q6.3_03.15sec	Y19_AA	4	-4.64207	-0.58235	217	1;1;4;1	-4.05972	4.05972	U105
A03_RD14-0003-44_45_46_47-1;1;4;1-M2U105-0.441GF-Q6.3_01.15sec	OT05589_AA	4	-5.10458	-1.05559	441	1;1;4;1	-4.04899	4.04899	U105
A02_RD14-0003-44_45-1;1-M4I35-0.062GF-QLAND_01.15sec	GT37778_Hisp	2	-4.63078	-0.624578	62	1;1	-4.00621	4.00621	I35
C06_RD14-0003-33_34_35_36-1;4;4;1-M2c-0.15GF-Q0.8_03.15sec	C52A_Asian	4	-5.24795	-1.24345	150	1;4;4;1	-4.0045	4.0045	c
G01_RD14-0003-40_41_42_43-1;1;1;1-M4I22-0.06GF-Q3.5_07.15sec	MT97123_Cauc	4	-4	-1.16166e-05	60	1;1;1;1	-3.99999	3.99999	I22
F01_RD14-0003-40_41_42_43-1;1;1;1-M4I22-0.124GF-Q3.5_06.15sec	MT94888_Cauc	4	-3.98716	-3.23888e-05	124	1;1;1;1	-3.98713	3.98713	I22
B02_RD14-0003-44_45-1;1-M3U105-0.03GF-Q5.5_02.15sec	GT38098_Cauc	2	-6.63639	-2.66824	30	1;1	-3.96815	3.96815	U105
H04_RD14-0003-40_41_42_43-1;1;1;1-M2S10-0.252GF-Q1.3_08.15sec	C21H_Hisp	4	-4.1798	-0.247017	252	1;1;1;1	-3.93278	3.93278	S10
A04_RD14-0003-30_31_32-1;4;4-M1S30-0.279GF-Q3.2_01.15sec	TT51399_Hisp	3	-8.4828	-4.55074	279	1;4;4	-3.93206	3.93206	S30
E02_RD14-0003-44_45_46_47-1;1;4;1-M3I15-0.105GF-Q1.1_05.15sec	C87H_Hisp	4	-3.92082	-8.02804e-05	105	1;1;4;1	-3.92074	3.92074	I15
C11_RD14-0003-48_49_50_29-1;4;4;4-M3d-0.195GF-Q0.9_03.15sec	C84C_Cauc	4	-4.54516	-0.627636	195	1;4;4;4	-3.91752	3.91752	d
D08_RD14-0003-30_31_32-1;4;4-M2U105-0.135GF-Q5.1_04.15sec	ZT79618_AA	3	-5.73283	-1.82296	135	1;4;4	-3.90987	3.90987	U105
A02_RD14-0003-36_37_38-1;2;1-M4c-0.06GF-Q1.1_01.15sec	MT97167_Cauc	3	-4.34486	-0.446269	60	1;2;1	-3.89859	3.89859	c
B09_RD14-0003-37_38_39_40-1;9;9;1-M2d-0.3GF-Q0.7_02.15sec	GT37853_Hisp	4	-4.97062	-1.09118	300	1;9;9;1	-3.87944	3.87944	d
B09_RD14-0003-47_48_49-1;9;9-M2d-0.285GF-Q1.4_02.15sec	WT52471_Cauc	3	-10.6696	-6.80213	285	1;9;9	-3.86745	3.86745	d
C03_RD14-0003-44_45_46_47-1;1;4;1-M3I35-0.217GF-QLAND_03.15sec	PT83862_AA	4	-3.9914	-0.177735	217	1;1;4;1	-3.81367	3.81367	I35
F05_RD14-0003-46_47_48-1;1;1-M4I35-0.093GF-QLAND_06.15sec	GT37692_Hisp	3	-5.86328	-2.05726	93	1;1;1	-3.80602	3.80602	I35
C10_RD14-0003-30_31_32-1;4;4-M3d-0.135GF-Q0.8_03.15sec	JT51463_AA	3	-4.51856	-0.713963	135	1;4;4	-3.80459	3.80459	d
E07_RD14-0003-46_47_48-1;1;1-M3e-0.093GF-Q0.8_05.15sec	C90A_Asian	3	-3.79317	-0.000749038	93	1;1;1	-3.79243	3.79243	e
B06_RD14-0003-49_50_29-1;4;1-M4I15-0.09GF-Q0.9_02.15sec	OT05894_AA	3	-3.77728	0.000301873	90	1;4;1	-3.77759	3.77759	I15
B09_RD14-0003-47_48_49-1;9;9-M2d-0.285GF-Q1.4_02.15sec	MT94815_Cauc	3	-3.15428	0.612932	285	1;9;9	-3.76721	3.76721	d
D03_RD14-0003-44_45_46_47-1;1;4;1-M2U105-0.105GF-Q6.3_04.15sec	WT52472_Cauc	4	-3.76195	0.000426007	105	1;1;4;1	-3.76238	3.76238	U105
H02_RD14-0003-36_37_38-1;2;1-M3e-0.124GF-Q1.6_08.15sec	C82C_Cauc	3	-3.76195	-9.71764e-05	124	1;2;1	-3.76186	3.76186	e
H11_RD14-0003-48_49_50_29-1;4;4;4-M2e-0.195GF-Q1.3_08.15sec	C41C_Cauc	4	-3.82681	-0.103041	195	1;4;4;4	-3.72377	3.72377	e
G02_RD14-0003-44_45_46_47-1;1;4;1-M2U60-0.217GF-Q4.3_07.15sec	JT51464_AA	4	-3.5376	0.163071	217	1;1;4;1	-3.70067	3.70067	U60
D02_RD14-0003-36_37_38-1;2;1-M3d-0.124GF-Q0.9_04.15sec	TT51694_Cauc	3	-5.36051	-1.66937	124	1;2;1	-3.69115	3.69115	d
B09_RD14-0003-47_48_49-1;9;9-M2d-0.285GF-Q1.4_02.15sec	OT05594_AA	3	-5.41908	-1.74182	285	1;9;9	-3.67726	3.67726	d
D02_RD14-0003-40_41_42_43-1;1;1;1-M2e-0.124GF-Q3.2_04.15sec	JT52346_Cauc	4	-3.66555	0.000478231	124	1;1;1;1	-3.66602	3.66602	e
A03_RD14-0003-36_37_38-1;2;1-M3e-0.06GF-Q1.6_01.15sec	C13C_Cauc	3	-3.6517	0.000233848	60	1;2;1	-3.65193	3.65193	e
A07_RD14-0003-44_45_46-1;2;2-M2d-0.075GF-Q1.8_01.15sec	WA29328_Hisp	3	-5.27491	-1.62904	75	1;2;2	-3.64587	3.64587	d
E05_RD14-0003-44_45_46_47-1;1;4;1-M1S30-0.441GF-Q2.9_05.15sec	ZT80655_Hisp	4	-5.2204	-1.59526	441	1;1;4;1	-3.62515	3.62515	S30
B08_RD14-0003-30_31_32-1;4;4-M3I35-0.135GF-QLAND_02.15sec	GT38067_Cauc	3	-5.9914	-2.37959	135	1;4;4	-3.61181	3.61181	I35
H04_RD14-0003-46_47_48-1;1;1-M4I15-0.045GF-Q0.8_08.15sec	Y5_Cauc	3	-4.0846	-0.516556	45	1;1;1	-3.56804	3.56804	I15
A02_RD14-0003-36_37_38-1;2;1-M4c-0.06GF-Q1.1_01.15sec	C72C_Cauc	3	-4.01189	-0.450385	60	1;2;1	-3.5615	3.5615	c
E04_RD14-0003-48_49_50_29-1;4;4;4-M2U105-0.195GF-Q12.1_05.15sec	JT51462_AA	4	-4.33348	-0.774004	195	1;4;4;4	-3.55948	3.55948	U105
D02_RD14-0003-44_45_46_47-1;1;4;1-M2U15-0.217GF-Q1.1_04.15sec	TT51304_Hisp	4	-3.86328	-0.307352	217	1;1;4;1	-3.55593	3.55593	U15
H03_RD14-0003-44_45_46_47-1;1;4;1-M2e-0.441GF-Q1.5_08.15sec	C08C_Cauc	4	-4.51286	-0.965733	441	1;1;4;1	-3.54713	3.54713	e
A08_RD14-0003-37_38_39_40-1;9;9;1-M2a-0.5GF-Q0.4_01.15sec	WT51503_AA	4	-5.46471	-1.93907	500	1;9;9;1	-3.52564	3.52564	a
D02_RD14-0003-44_45_46_47-1;1;4;1-M2U15-0.217GF-Q1.1_04.15sec	C69H_Hisp	4	-3.80688	-0.334136	217	1;1;4;1	-3.47274	3.47274	U15
A05_RD14-0003-40_41_42_43-1;1;1;1-M2S10-0.124GF-Q1.3_01.15sec	C94C_Cauc	4	-3.4168	0.0529037	124	1;1;1;1	-3.4697	3.4697	S10
C11_RD14-0003-48_49_50_29-1;4;4;4-M3d-0.195GF-Q0.9_03.15sec	UT58305_Cauc	4	-4.06601	-0.612872	195	1;4;4;4	-3.45313	3.45313	d
A02_RD14-0003-40_41_42_43-1;1;1;1-M4I35-0.124GF-QLAND_01.15sec	MT95358_AA	4	-3.4437	-6.132e-05	124	1;1;1;1	-3.44364	3.44364	I35
B05_RD14-0003-46_47_48-1;1;1-M4I22-0.093GF-Q1.4_02.15sec	ZT80163_Hisp	3	-5.05257	-1.61324	93	1;1;1	-3.43932	3.43932	I22
G01_RD14-0003-40_41_42_43-1;1;1;1-M4I22-0.06GF-Q3.5_07.15sec	TT51483_Hisp	4	-3.40012	-3.28819e-05	60	1;1;1;1	-3.40008	3.40008	I22
A09_RD14-0003-47_48_49-1;9;9-M2d-0.5GF-Q1.4_01.15sec	GT37184_AA	3	-6.85078	-3.4548	500	1;9;9	-3.39598	3.39598	d
D02_RD14-0003-44_45_46_47-1;1;4;1-M2U15-0.217GF-Q1.1_04.15sec	ZT80658_Hisp	4	-3.74715	-0.353624	217	1;1;4;1	-3.39352	3.39352	U15
F01_RD14-0003-40_41_42_43-1;1;1;1-M2U60-0.124GF-Q4.7_06.15sec	JT51331_AA	4	-3.40561	-0.017561	124	1;1;1;1	-3.38805	3.38805	U60
A03_RD14-0003-46_47_48-1;1;1-M3S10-0.045GF-Q1.4_01.15sec	UT58333_Cauc	3	-3.35853	0.000223569	45	1;1;1	-3.35875	3.35875	S10
A09_RD14-0003-49_50_29-1;4;1-M3e-0.186GF-Q1.6_01.15sec	MT95379_AA	3	-3.36051	-0.00629836	186	1;4;1	-3.35422	3.35422	e
C03_RD14-0003-44_45_46_47-1;1;4;1-M2U105-0.217GF-Q6.3_03.15sec	C71A_Asian	4	-4.098	-0.747885	217	1;1;4;1	-3.35011	3.35011	U105
D03_RD14-0003-49_50_29-1;4;1-M1S30-0.378GF-Q2.8_04.15sec	ZT79311_AA	3	-3.39469	-0.0621929	378	1;4;1	-3.3325	3.3325	S30
E06_RD14-0003-44_45_46-1;2;2-M3c-0.075GF-Q0.9_05.15sec	MT94817_Cauc	3	-4.35952	-1.03295	75	1;2;2	-3.32657	3.32657	c
D04_RD14-0003-36_37_38_39-1;2;2;1-M1S30-0.378GF-Q2.6_04.15sec	C12A_Asian	4	-4.87615	-1.58207	378	1;2;2;1	-3.29408	3.29408	S30
B05_RD14-0003-32_33_34_35-1;1;9;1-M2e-0.18GF-Q0.6_02.15sec	C94A_Asian	4	-3.25414	0.034042	180	1;1;9;1	-3.28819	3.28819	e
F01_RD14-0003-40_41_42_43-1;1;1;1-M4I22-0.124GF-Q3.5_06.15sec	JM28315_Cauc	4	-3.28651	-0.00081453	124	1;1;1;1	-3.28569	3.28569	I22
C07_RD14-0003-44_45_46-1;2;2-M2e-0.305GF-Q2.9_03.15sec	GA05071_Hisp	3	-5.31336	-2.03855	305	1;2;2	-3.27482	3.27482	e
G01_RD14-0003-44_45-1;1-M4U60-0.03GF-Q4.6_07.15sec	GT37778_Hisp	2	-6.52724	-3.2543	30	1;1	-3.27295	3.27295	U60
A02_RD14-0003-44_45-1;1-M4d-0.031GF-Q0.9_01.15sec	C81C_Cauc	2	-3.28233	-0.0217439	31	1;1	-3.26059	3.26059	d
G03_RD14-0003-48_49_50_29-1;4;4;4-M3I15-0.195GF-Q1.1_07.15sec	PT83874_AA	4	-3.13668	0.107133	195	1;4;4;4	-3.24381	3.24381	I15
H11_RD14-0003-48_49_50_29-1;4;4;4-M2e-0.195GF-Q1.3_08.15sec	PT86536_Cauc	4	-3.32883	-0.0883358	195	1;4;4;4	-3.24049	3.24049	e
G06_RD14-0003-33_34_35_36-1;4;4;1-M2d-0.15GF-Q0.9_07.15sec	C64H_Hisp	4	-5.41794	-2.18724	150	1;4;4;1	-3.2307	3.2307	d
G01_RD14-0003-40_41_42_43-1;1;1;1-M4I22-0.06GF-Q3.5_07.15sec	C11B_AA	4	-3.22475	-0.000196661	60	1;1;1;1	-3.22456	3.22456	I22
F07_RD14-0003-46_47_48-1;1;1-M3e-0.045GF-Q0.8_06.15sec	TT51682_Cauc	3	-3.73518	-0.518724	45	1;1;1	-3.21646	3.21646	e
F09_RD14-0003-47_48_49-1;9;9-M2e-0.5GF-Q1.5_06.15sec	C93B_AA	3	-5.38616	-2.17008	500	1;9;9	-3.21608	3.21608	e
H06_RD14-0003-49_50_29-1;4;1-M4I35-0.09GF-QLAND_08.15sec	OT05896_AA	3	-3.20901	9.90798e-05	90	1;4;1	-3.20911	3.20911	I35
C06_RD14-0003-33_34_35_36-1;4;4;1-M2c-0.15GF-Q0.8_03.15sec	MT94886_Cauc	4	-3.79048	-0.600747	150	1;4;4;1	-3.18974	3.18974	c
E05_RD14-0003-36_37_38_39-1;2;2;1-M2e-0.378GF-Q1.2_05.15sec	C55C_Cauc	4	-4.12901	-0.947475	378	1;2;2;1	-3.18154	3.18154	e
D05_RD14-0003-46_47_48-1;1;1-M4I22-0.045GF-Q1.4_04.15sec	UT58302_Cauc	3	-3.16877	-0.000411409	45	1;1;1	-3.16836	3.16836	I22
E04_RD14-0003-48_49_50_29-1;4;4;4-M4I35-0.195GF-Q78.7_05.15sec	C17H_Hisp	4	-3.15739	-1.16e-05	195	1;4;4;4	-3.15738	3.15738	I35
D02_RD14-0003-36_37_38-1;2;1-M3d-0.124GF-Q0.9_04.15sec	TT51399_Hisp	3	-2.86646	0.253934	124	1;2;1	-3.1204	3.1204	d
E01_RD14-0003-50_29_30_31-1;1;2;1-M3a-0.075GF-Q0.5_05.15sec	C03H_Hisp	4	-4.10735	-0.987644	75	1;1;2;1	-3.1197	3.1197	a
E06_RD14-0003-44_45_46-1;2;2-M3c-0.075GF-Q0.9_05.15sec	MT97176_Cauc	3	-3.95078	-0.84529	75	1;2;2	-3.10549	3.10549	c
A05_RD14-0003-32_33_34_35-1;1;9;1-M2e-0.372GF-Q0.6_01.15sec	PT84348_Hisp	4	-4.57187	-1.47622	372	1;1;9;1	-3.09565	3.09565	e
F04_RD14-0003-41_42_43-1;9;1-M2d-0.165GF-Q1.2_06.15sec	GT36875_Cauc	3	-3.05899	0.000537826	165	1;9;1	-3.05952	3.05952	d
F06_RD14-0003-49_50_29-1;4;1-M2U60-0.186GF-Q3.8_06.15sec	C50H_Hisp	3	-3.19928	-0.147192	186	1;4;1	-3.05209	3.05209	U60
H02_RD14-0003-46_47_48-1;1;1-M3S10-0.093GF-Q1.4_08.15sec	ZT80384_Hisp	3	-5.73049	-2.6872	93	1;1;1	-3.04329	3.04329	S10
F03_RD14-0003-44_45_46_47-1;1;4;1-M3d-0.105GF-Q0.8_06.15sec	Y34_AA	4	-3.01547	0.000362124	105	1;1;4;1	-3.01583	3.01583	d
D05_RD14-0003-44_45_46_47-1;1;4;1-M1S30-0.75GF-Q2.9_04.15sec	ZT79327_AA	4	-4.2993	-1.28758	750	1;1;4;1	-3.01172	3.01172	S30
D03_RD14-0003-44_45_46_47-1;1;4;1-M2U105-0.105GF-Q6.3_04.15sec	GT38087_Cauc	4	-3.011	0.000271253	105	1;1;4;1	-3.01127	3.01127	U105
H04_RD14-0003-41_42_43-1;9;1-M2e-0.52GF-Q1.7_08.15sec	JT51494_AA	3	-3.20135	-0.191645	520	1;9;1	-3.0097	3.0097	e
D03_RD14-0003-44_45_46_47-1;1;4;1-M3I35-0.105GF-QLAND_04.15sec	C69A_Asian	4	-3	5.96567e-05	105	1;1;4;1	-3.00006	3.00006	I35
C07_RD14-0003-33_34_35_36-1;4;4;1-M2e-0.15GF-Q0.9_03.15sec	ZT80658_Hisp	4	-3.04721	-0.0504482	150	1;4;4;1	-2.99676	2.99676	e
E02_RD14-0003-44_45_46_47-1;1;4;1-M4U15-0.105GF-Q4.4_05.15sec	ZT80925_Hisp	4	-3.0348	-0.0400201	105	1;1;4;1	-2.99478	2.99478	U15
A03_RD14-0003-44_45_46_47-1;1;4;1-M3a-0.105GF-Q0.8_01.15sec	ZT79899_Hisp	4	-2.98716	7.15164e-05	105	1;1;4;1	-2.98723	2.98723	a
A05_RD14-0003-36_37_38_39-1;2;2;1-M3d-0.186GF-Q1.2_01.15sec	C45C_Cauc	4	-3.10018	-0.113502	186	1;2;2;1	-2.98668	2.98668	d
H02_RD14-0003-44_45_46_47-1;1;4;1-M3a-0.217GF-Q0.8_08.15sec	GT36884_Cauc	4	-3.06399	-0.0780327	217	1;1;4;1	-2.98596	2.98596	a
C02_RD14-0003-40_41_42_43-1;1;1;1-M2e-0.252GF-Q3.2_03.15sec	C89H_Hisp	4	-3.2426	-0.262684	252	1;1;1;1	-2.97992	2.97992	e
F01_RD14-0003-40_41_42_43-1;1;1;1-M2U60-0.124GF-Q4.7_06.15sec	C29H_Hisp	4	-2.78781	0.190917	124	1;1;1;1	-2.97873	2.97873	U60
C01_RD14-0003-40_41_42_43-1;1;1;1-M4I15-0.124GF-Q1.6_03.15sec	C17A_Asian	4	-2.93181	-8.4908e-05	124	1;1;1;1	-2.93173	2.93173	I15
B09_RD14-0003-49_50_29-1;4;1-M3e-0.09GF-Q1.6_02.15sec	C20C_Cauc	3	-3.47886	-0.561491	90	1;4;1	-2.91737	2.91737	e
C07_RD14-0003-30_31_32-1;4;4-M4I15-0.135GF-Q1.4_03.15sec	C73C_Cauc	3	-3.57349	-0.667904	135	1;4;4	-2.90559	2.90559	I15
H07_RD14-0003-37_38_39_40-1;9;9;1-M2a-0.62GF-Q0.4_08.15sec	PT83918_AA	4	-4.92082	-2.01758	620	1;9;9;1	-2.90324	2.90324	a
G09_RD14-0003-37_38_39_40-1;9;9;1-M2e-0.3GF-Q0.8_07.15sec	ZT80147_Hisp	4	-3.70115	-0.799754	300	1;9;9;1	-2.90139	2.90139	e
D04_RD14-0003-36_37_38_39-1;2;2;1-M1S30-0.378GF-Q2.6_04.15sec	PT86478_Cauc	4	-3.97881	-1.07939	378	1;2;2;1	-2.89942	2.89942	S30
E02_RD14-0003-50_29_30_31-1;1;2;1-M4d-0.075GF-Q1.2_05.15sec	C97C_Cauc	4	-2.8962	-3.72336e-06	75	1;1;2;1	-2.89619	2.89619	d
G06_RD14-0003-49_50_29-1;4;1-M3U60-0.09GF-Q6.7_07.15sec	C30B_AA	3	-2.90309	-0.0646908	90	1;4;1	-2.8384	2.8384	U60
E02_RD14-0003-44_45_46_47-1;1;4;1-M3I15-0.105GF-Q1.1_05.15sec	C65A_Asian	4	-2.83268	-5.26342e-05	105	1;1;4;1	-2.83263	2.83263	I15
F07_RD14-0003-44_45_46-1;2;2-M2e-0.075GF-Q2.9_06.15sec	C05A_Asian	3	-2.82102	-0.000932549	75	1;2;2	-2.82009	2.82009	e
B06_RD14-0003-49_50_29-1;4;1-M4I15-0.09GF-Q0.9_02.15sec	PT84182_AA	3	-2.52433	0.292766	90	1;4;1	-2.8171	2.8171	I15
D03_RD14-0003-44_45_46_47-1;1;4;1-M3I35-0.105GF-QLAND_04.15sec	C06H_Hisp	4	-2.80688	0.000104421	105	1;1;4;1	-2.80698	2.80698	I35
B04_RD14-0003-32_33_34_35-1;1;9;1-M2c-0.18GF-Q0.4_02.15sec	ZT79318_AA	4	-2.99568	-0.189029	180	1;1;9;1	-2.80665	2.80665	c
F01_RD14-0003-40_41_42_43-1;1;1;1-M4I22-0.124GF-Q3.5_06.15sec	Y4_Cauc	4	-2.78781	-0.00031962	124	1;1;1;1	-2.78749	2.78749	I22
F05_RD14-0003-46_47_48-1;1;1-M3U60-0.045GF-Q4.0_06.15sec	C51A_Asian	3	-3.48945	-0.72501	45	1;1;1	-2.76444	2.76444	U60
A03_RD14-0003-36_37_38-1;2;1-M3e-0.06GF-Q1.6_01.15sec	PT86478_Cauc	3	-2.76447	-0.000120628	60	1;2;1	-2.76435	2.76435	e
F02_RD14-0003-44_45_46_47-1;1;4;1-M2U60-0.441GF-Q4.3_06.15sec	MT97164_Cauc	4	-3.06753	-0.304162	441	1;1;4;1	-2.76336	2.76336	U60
F05_RD14-0003-36_37_38_39-1;2;2;1-M2e-0.186GF-Q1.2_06.15sec	MT95379_AA	4	-4.49894	-1.7469	186	1;2;2;1	-2.75204	2.75204	e
D04_RD14-0003-36_37_38_39-1;2;2;1-M1S30-0.378GF-Q2.6_04.15sec	C43A_Asian	4	-4.07469	-1.33229	378	1;2;2;1	-2.74239	2.74239	S30
B05_RD14-0003-36_37_38_39-1;2;2;1-M3d-0.09GF-Q1.2_02.15sec	C26A_Asian	4	-2.73283	0.000327321	90	1;2;2;1	-2.73316	2.73316	d
B04_RD14-0003-44_45_46_47-1;1;4;1-M2e-0.105GF-Q1.5_02.15sec	C07C_Cauc	4	-2.73283	0.000175687	105	1;1;4;1	-2.733	2.733	e
E01_RD14-0003-40_41_42_43-1;1;1;1-M4a-0.06GF-Q0.7_05.15sec	GT38066_Cauc	4	-2.72816	0.00021172	60	1;1;1;1	-2.72837	2.72837	a
G10_RD14-0003-48_49_50_29-1;4;4;4-M3c-0.195GF-Q1.1_07.15sec	C97C_Cauc	4	-4.20204	-1.48289	195	1;4;4;4	-2.71915	2.71915	c
E07_RD14-0003-46_47_48-1;1;1-M3e-0.093GF-Q0.8_05.15sec	C94C_Cauc	3	-2.71444	-0.00117935	93	1;1;1	-2.71326	2.71326	e
B05_RD14-0003-32_33_34_35-1;1;9;1-M2e-0.18GF-Q0.6_02.15sec	C66H_Hisp	4	-3.02919	-0.320359	180	1;1;9;1	-2.70883	2.70883	e
H05_RD14-0003-46_47_48-1;1;1-M2U105-0.093GF-Q4.6_08.15sec	C69A_Asian	3	-4.057	-1.34971	93	1;1;1	-2.7073	2.7073	U105
F10_RD14-0003-36_37_38-1;2;1-M3c-0.124GF-Q0.9_06.15sec	C94B_AA	3	-1.85699	0.845189	124	1;2;1	-2.70217	2.70217	c
B02_RD14-0003-40_41_42_43-1;1;1;1-M4I35-0.06GF-QLAND_02.15sec	C56B_AA	4	-2.6968	0.000173029	60	1;1;1;1	-2.69698	2.69698	I35
H04_RD14-0003-46_47_48-1;1;1-M4I15-0.045GF-Q0.8_08.15sec	ZT80154_Hisp	3	-2.95078	-0.281746	45	1;1;1	-2.66904	2.66904	I15
A03_RD14-0003-44_45_46_47-1;1;4;1-M2U105-0.441GF-Q6.3_01.15sec	C56B_AA	4	-3.6968	-1.03836	441	1;1;4;1	-2.65844	2.65844	U105
F04_RD14-0003-41_42_43-1;9;1-M2d-0.165GF-Q1.2_06.15sec	PT85499_Hisp	3	-2.63639	0.00029634	165	1;9;1	-2.63668	2.63668	d
F07_RD14-0003-44_45_46-1;2;2-M2e-0.075GF-Q2.9_06.15sec	C11C_Cauc	3	-2.6216	0.000539209	75	1;2;2	-2.62214	2.62214	e
G06_RD14-0003-49_50_29-1;4;1-M3U60-0.09GF-Q6.7_07.15sec	PT83896_AA	3	-2.67366	-0.0518991	90	1;4;1	-2.62177	2.62177	U60
H02_RD14-0003-46_47_48-1;1;1-M3S10-0.093GF-Q1.4_08.15sec	UT58336_Cauc	3	-5.07058	-2.46111	93	1;1;1	-2.60947	2.60947	S10
F05_RD14-0003-44_45_46_47-1;1;4;1-M2S30-0.217GF-Q3.3_06.15sec	C14B_AA	4	-2.8962	-0.289545	217	1;1;4;1	-2.60665	2.60665	S30
F03_RD14-0003-44_45_46_47-1;1;4;1-M3d-0.105GF-Q0.8_06.15sec	MT95368_AA	4	-2.5784	0.000412834	105	1;1;4;1	-2.57881	2.57881	d
E04_RD14-0003-36_37_38_39-1;2;2;1-M2S30-0.186GF-Q2.9_05.15sec	UC10178_Cauc	4	-3.42597	-0.878431	186	1;2;2;1	-2.54754	2.54754	S30
E04_RD14-0003-48_49_50_29-1;4;4;4-M2U105-0.195GF-Q12.1_05.15sec	ZT79319_AA	4	-3.30016	-0.753344	195	1;4;4;4	-2.54682	2.54682	U105
B02_RD14-0003-40_41_42_43-1;1;1;1-M4I35-0.06GF-QLAND_02.15sec	WT51362_Cauc	4	-2.52433	-2.59325e-05	60	1;1;1;1	-2.5243	2.5243	I35
F07_RD14-0003-44_45_46-1;2;2-M2e-0.075GF-Q2.9_06.15sec	GT37869_Hisp	3	-2.50169	0.000202712	75	1;2;2	-2.50189	2.50189	e
H02_RD14-0003-44_45_46_47-1;1;4;1-M3I22-0.105GF-Q1.9_08.15sec	MT97155_Cauc	4	-2.49621	-0.000100846	105	1;1;4;1	-2.49611	2.49611	I22
D01_RD14-0003-44_45-1;1-M3S30-0.062GF-Q3.1_04.15sec	PT84234_AA	2	-0.759451	1.72625	62	1;1	-2.4857	2.4857	S30
F04_RD14-0003-41_42_43-1;9;1-M2d-0.165GF-Q1.2_06.15sec	C88B_AA	3	-2.47496	0.000189626	165	1;9;1	-2.47514	2.47514	d
C02_RD14-0003-40_41_42_43-1;1;1;1-M2e-0.252GF-Q3.2_03.15sec	UA16895_Cauc	4	-2.7122	-0.240102	252	1;1;1;1	-2.4721	2.4721	e
C06_RD14-0003-33_34_35_36-1;4;4;1-M2c-0.15GF-Q0.8_03.15sec	C44C_Cauc	4	-2.81816	-0.356698	150	1;4;4;1	-2.46146	2.46146	c
E02_RD14-0003-36_37_38-1;2;1-M4d-0.06GF-Q1.2_05.15sec	C72H_Hisp	3	-2.79588	-0.336344	60	1;2;1	-2.45954	2.45954	d
G09_RD14-0003-37_38_39_40-1;9;9;1-M2e-0.3GF-Q0.8_07.15sec	JA44327_Cauc	4	-3.32975	-0.887675	300	1;9;9;1	-2.44208	2.44208	e
A05_RD14-0003-36_37_38_39-1;2;2;1-M3d-0.186GF-Q1.2_01.15sec	UT57281_Cauc	4	-2.43063	0.000659401	186	1;2;2;1	-2.43129	2.43129	d
D01_RD14-0003-40_41_42_43-1;1;1;1-M4I15-0.06GF-Q1.6_04.15sec	C93H_Hisp	4	-2.38195	0.0421569	60	1;1;1;1	-2.42411	2.42411	I15
F10_RD14-0003-30_31_32-1;4;4-M2e-0.279GF-Q1.0_06.15sec	MT94893_Cauc	3	-4.77728	-2.35789	279	1;4;4	-2.41939	2.41939	e
G09_RD14-0003-37_38_39_40-1;9;9;1-M2e-0.3GF-Q0.8_07.15sec	C52A_Asian	4	-3.09854	-0.679624	300	1;9;9;1	-2.41892	2.41892	e
H02_RD14-0003-36_37_38-1;2;1-M3e-0.124GF-Q1.6_08.15sec	TT51279_Hisp	3	-2.40671	-0.000640983	124	1;2;1	-2.40607	2.40607	e
G01_RD14-0003-40_41_42_43-1;1;1;1-M4I22-0.06GF-Q3.5_07.15sec	TT51694_Cauc	4	-2.39147	2.29846e-06	60	1;1;1;1	-2.39148	2.39148	I22
A05_RD14-0003-40_41_42_43-1;1;1;1-M2S10-0.124GF-Q1.3_01.15sec	UT58301_Cauc	4	-2.28651	0.0812494	124	1;1;1;1	-2.36776	2.36776	S10
A04_RD14-0003-44_45_46_47-1;1;4;1-M2e-0.217GF-Q1.5_01.15sec	C37C_Cauc	4	-3.01368	-0.647223	217	1;1;4;1	-2.36645	2.36645	e
H02_RD14-0003-44_45_46_47-1;1;4;1-M3I22-0.105GF-Q1.9_08.15sec	C12A_Asian	4	-2.33724	0.000603406	105	1;1;4;1	-2.33785	2.33785	I22
B04_RD14-0003-41_42_43-1;9;1-M2c-0.165GF-Q1.1_02.15sec	TT51023_Hisp	3	-2.30016	0.012468	165	1;9;1	-2.31263	2.31263	c
H03_RD14-0003-44_45_46_47-1;1;4;1-M2e-0.441GF-Q1.5_08.15sec	UT58320_Cauc	4	-3.29757	-0.986426	441	1;1;4;1	-2.31114	2.31114	e
F08_RD14-0003-37_38_39_40-1;9;9;1-M2c-0.3GF-Q0.6_06.15sec	UT57303_Cauc	4	-2.73283	-0.446091	300	1;9;9;1	-2.28674	2.28674	c
D03_RD14-0003-44_45_46_47-1;1;4;1-M3I35-0.105GF-QLAND_04.15sec	C87C_Cauc	4	-2.27737	-9.58497e-05	105	1;1;4;1	-2.27727	2.27727	I35
C02_RD14-0003-40_41_42_43-1;1;1;1-M2e-0.252GF-Q3.2_03.15sec	ZT80154_Hisp	4	-2.54821	-0.276734	252	1;1;1;1	-2.27148	2.27148	e
D01_RD14-0003-40_41_42_43-1;1;1;1-M4I15-0.06GF-Q1.6_04.15sec	GT37767_Hisp	4	-2.266	9.27111e-05	60	1;1;1;1	-2.26609	2.26609	I15
E02_RD14-0003-44_45_46_47-1;1;4;1-M4U15-0.105GF-Q4.4_05.15sec	OT05569_AA	4	-2.28651	-0.0426234	105	1;1;4;1	-2.24389	2.24389	U15
D01_RD14-0003-40_41_42_43-1;1;1;1-M4I15-0.06GF-Q1.6_04.15sec	C59H_Hisp	4	-2.23732	-3.29294e-05	60	1;1;1;1	-2.23729	2.23729	I15
F04_RD14-0003-32_33_34_35-1;1;9;1-M2d-0.18GF-Q0.5_06.15sec	JT51331_AA	4	-2.91721	-0.684745	180	1;1;9;1	-2.23247	2.23247	d
A03_RD14-0003-50_29_30_31-1;1;2;1-M3e-0.075GF-Q1.1_01.15sec	PT84179_AA	4	-2.2321	0.00016232	75	1;1;2;1	-2.23226	2.23226	e
B08_RD14-0003-37_38_39_40-1;9;9;1-M2a-0.3GF-Q0.4_02.15sec	PT84241_AA	4	-3.1261	-0.911371	300	1;9;9;1	-2.21473	2.21473	a
F09_RD14-0003-37_38_39_40-1;9;9;1-M2e-0.5GF-Q0.8_06.15sec	UT57635_Asian	4	-2.44733	-0.234211	500	1;9;9;1	-2.21312	2.21312	e
A09_RD14-0003-49_50_29-1;4;1-M3e-0.186GF-Q1.6_01.15sec	UA16903_Cauc	3	-2.18442	0.0258609	186	1;4;1	-2.21028	2.21028	e
G01_RD14-0003-40_41_42_43-1;1;1;1-M3U60-0.06GF-Q38.8_07.15sec	C06C_Cauc	4	-2.53611	-0.325957	60	1;1;1;1	-2.21015	2.21015	U60
A04_RD14-0003-44_45_46_47-1;1;4;1-M2e-0.217GF-Q1.5_01.15sec	MT97200_Cauc	4	-1.12552	1.06039	217	1;1;4;1	-2.1859	2.1859	e
H01_RD14-0003-40_41_42_43-1;1;1;1-M4d-0.124GF-Q1.7_08.15sec	C69A_Asian	4	-2.18243	-0.000118524	124	1;1;1;1	-2.18232	2.18232	d
C03_RD14-0003-44_45_46_47-1;1;4;1-M2U105-0.217GF-Q6.3_03.15sec	C29A_Asian	4	-1.74232	0.43464	217	1;1;4;1	-2.17696	2.17696	U105
E02_RD14-0003-50_29_30_31-1;1;2;1-M4d-0.075GF-Q1.2_05.15sec	MT97126_Cauc	4	-2.17263	-8.85606e-05	75	1;1;2;1	-2.17254	2.17254	d
D05_RD14-0003-44_45_46_47-1;1;4;1-M1S30-0.75GF-Q2.9_04.15sec	C32C_Cauc	4	-3.28233	-1.11797	750	1;1;4;1	-2.16436	2.16436	S30
D05_RD14-0003-44_45_46_47-1;1;4;1-M1S30-0.75GF-Q2.9_04.15sec	C22H_Hisp	4	-2.1986	-0.0760341	750	1;1;4;1	-2.12256	2.12256	S30
B04_RD14-0003-30_31_32-1;4;4-M2S30-0.135GF-Q3.8_02.15sec	Y18_AA	3	-3.09098	-0.975307	135	1;4;4	-2.11567	2.11567	S30
B04_RD14-0003-41_42_43-1;9;1-M2c-0.165GF-Q1.1_02.15sec	MT94826_Cauc	3	-0.787812	1.32776	165	1;9;1	-2.11557	2.11557	c
C07_RD14-0003-33_34_35_36-1;4;4;1-M2e-0.15GF-Q0.9_03.15sec	C55B_AA	4	-2.27654	-0.169076	150	1;4;4;1	-2.10747	2.10747	e
G01_RD14-0003-40_41_42_43-1;1;1;1-M3U60-0.06GF-Q38.8_07.15sec	C52H_Hisp	4	-2.08566	-0.000456537	60	1;1;1;1	-2.0852	2.0852	U60
C02_RD14-0003-40_41_42_43-1;1;1;1-M2e-0.252GF-Q3.2_03.15sec	PT83880_AA	4	-2.0348	0.0252576	252	1;1;1;1	-2.06006	2.06006	e
G02_RD14-0003-44_45_46_47-1;1;4;1-M3I22-0.217GF-Q1.9_07.15sec	PT84201_AA	4	-1.5867	0.443419	217	1;1;4;1	-2.03012	2.03012	I22
D03_RD14-0003-44_45_46_47-1;1;4;1-M3I35-0.105GF-QLAND_04.15sec	MT97173_Cauc	4	-2.02365	0.000157679	105	1;1;4;1	-2.02381	2.02381	I35
E02_RD14-0003-50_29_30_31-1;1;2;1-M4d-0.075GF-Q1.2_05.15sec	UA16894_Cauc	4	-1.99568	0.000159704	75	1;1;2;1	-1.99584	1.99584	d
A03_RD14-0003-50_29_30_31-1;1;2;1-M3e-0.075GF-Q1.1_01.15sec	UC10177_Cauc	4	-1.99568	-0.000218627	75	1;1;2;1	-1.99546	1.99546	e
A07_RD14-0003-46_47_48-1;1;1-M4d-0.045GF-Q0.6_01.15sec	C100C_Cauc	3	-2.36856	-0.38249	45	1;1;1	-1.98607	1.98607	d
G11_RD14-0003-48_49_50_29-1;4;4;4-M2e-0.403GF-Q1.3_07.15sec	C40A_Asian	4	-1.68403	0.298823	403	1;4;4;4	-1.98285	1.98285	e
E07_RD14-0003-44_45_46-1;2;2-M2e-0.155GF-Q2.9_05.15sec	GT37864_Hisp	3	-3.30803	-1.33062	155	1;2;2	-1.97742	1.97742	e
F04_RD14-0003-32_33_34_35-1;1;9;1-M2d-0.18GF-Q0.5_06.15sec	ZT79899_Hisp	4	-2.61439	-0.658134	180	1;1;9;1	-1.95626	1.95626	d
G09_RD14-0003-37_38_39_40-1;9;9;1-M2e-0.3GF-Q0.8_07.15sec	MT94886_Cauc	4	-2.34872	-0.419224	300	1;9;9;1	-1.9295	1.9295	e
A03_RD14-0003-44_45_46_47-1;1;4;1-M3a-0.105GF-Q0.8_01.15sec	C58A_Asian	4	-2.1945	-0.282548	105	1;1;4;1	-1.91195	1.91195	a
G11_RD14-0003-48_49_50_29-1;4;4;4-M2e-0.403GF-Q1.3_07.15sec	OT05569_AA	4	-1.03574	0.870803	403	1;4;4;4	-1.90654	1.90654	e
A02_RD14-0003-40_41_42_43-1;1;1;1-M4d-0.06GF-Q1.7_01.15sec	ZT80625_Hisp	4	-1.5867	0.311131	60	1;1;1;1	-1.89783	1.89783	d
H03_RD14-0003-44_45_46_47-1;1;4;1-M2e-0.441GF-Q1.5_08.15sec	UT58302_Cauc	4	-2.72584	-0.838322	441	1;1;4;1	-1.88752	1.88752	e
E04_RD14-0003-48_49_50_29-1;4;4;4-M4I35-0.195GF-Q78.7_05.15sec	OT05894_AA	4	-2.63078	-0.746487	195	1;4;4;4	-1.8843	1.8843	I35
F09_RD14-0003-37_38_39_40-1;9;9;1-M2e-0.5GF-Q0.8_06.15sec	C92B_AA	4	-2.11014	-0.243781	500	1;9;9;1	-1.86636	1.86636	e
A03_RD14-0003-44_45_46_47-1;1;4;1-M2U105-0.441GF-Q6.3_01.15sec	C67C_Cauc	4	-2.76195	-0.896829	441	1;1;4;1	-1.86512	1.86512	U105
E05_RD14-0003-44_45_46_47-1;1;4;1-M1S30-0.441GF-Q2.9_05.15sec	ZT81068_Hisp	4	-3.47496	-1.62288	441	1;1;4;1	-1.85207	1.85207	S30
F05_RD14-0003-44_45_46_47-1;1;4;1-M2S30-0.217GF-Q3.3_06.15sec	WT51510_AA	4	-1.42946	0.415968	217	1;1;4;1	-1.84542	1.84542	S30
A05_RD14-0003-41_42_43-1;9;1-M2e-0.341GF-Q1.7_01.15sec	C31B_AA	3	-1.97469	-0.145013	341	1;9;1	-1.82968	1.82968	e
F03_RD14-0003-49_50_29-1;4;1-M3S30-0.09GF-Q2.9_06.15sec	UT58299_Cauc	3	-3.32422	-1.49692	90	1;4;1	-1.8273	1.8273	S30
A03_RD14-0003-44_45_46_47-1;1;4;1-M3a-0.105GF-Q0.8_01.15sec	C61B_AA	4	-1.80134	-0.000179271	105	1;1;4;1	-1.80116	1.80116	a
E02_RD14-0003-44_45_46_47-1;1;4;1-M4U15-0.105GF-Q4.4_05.15sec	PT83893_AA	4	-1.84164	-0.0494719	105	1;1;4;1	-1.79217	1.79217	U15
F10_RD14-0003-30_31_32-1;4;4-M2e-0.279GF-Q1.0_06.15sec	C13A_Asian	3	-6.43297	-4.65162	279	1;4;4	-1.78135	1.78135	e
B05_RD14-0003-41_42_43-1;9;1-M2e-0.165GF-Q1.7_02.15sec	C77A_Asian	3	-1.77211	4.47543e-07	165	1;9;1	-1.77211	1.77211	e
G06_RD14-0003-49_50_29-1;4;1-M3U60-0.09GF-Q6.7_07.15sec	PT85089_Hisp	3	-1.76195	-0.0144051	90	1;4;1	-1.74755	1.74755	U60
B05_RD14-0003-32_33_34_35-1;1;9;1-M2e-0.18GF-Q0.6_02.15sec	PT84633_Hisp	4	-0.917215	0.824747	180	1;1;9;1	-1.74196	1.74196	e
D05_RD14-0003-44_45_46_47-1;1;4;1-M1S30-0.75GF-Q2.9_04.15sec	ZC08844_Cauc	4	-1.99568	-0.272213	750	1;1;4;1	-1.72347	1.72347	S30
E05_RD14-0003-36_37_38_39-1;2;2;1-M2e-0.378GF-Q1.2_05.15sec	UT57288_Cauc	4	-2.19997	-0.476777	378	1;2;2;1	-1.72319	1.72319	e
C03_RD14-0003-44_45_46_47-1;1;4;1-M2U105-0.217GF-Q6.3_03.15sec	MT94827_Cauc	4	-2.03245	-0.321785	217	1;1;4;1	-1.71067	1.71067	U105
E05_RD14-0003-44_45_46_47-1;1;4;1-M1S30-0.441GF-Q2.9_05.15sec	C44H_Hisp	4	-2.95468	-1.24445	441	1;1;4;1	-1.71022	1.71022	S30
F04_RD14-0003-36_37_38_39-1;2;2;1-M3a-0.09GF-Q0.7_06.15sec	TT51669_Cauc	4	-1.70997	0.000125004	90	1;2;2;1	-1.71009	1.71009	a
C11_RD14-0003-48_49_50_29-1;4;4;4-M3d-0.195GF-Q0.9_03.15sec	C46B_AA	4	-2.31785	-0.620417	195	1;4;4;4	-1.69744	1.69744	d
B08_RD14-0003-37_38_39_40-1;9;9;1-M2a-0.3GF-Q0.4_02.15sec	TT51683_Cauc	4	-2.15739	-0.484558	300	1;9;9;1	-1.67283	1.67283	a
F04_RD14-0003-36_37_38_39-1;2;2;1-M3a-0.09GF-Q0.7_06.15sec	OT05897_AA	4	-1.56864	0.10152	90	1;2;2;1	-1.67016	1.67016	a
A02_RD14-0003-40_41-1;4-M3S30-0.075GF-Q4.0_01.15sec	C27H_Hisp	2	-7.36856	-5.70457	75	1;4	-1.66398	1.66398	S30
A02_RD14-0003-40_41_42_43-1;1;1;1-M4d-0.06GF-Q1.7_01.15sec	WA29566_Cauc	4	-1.66154	0.000345022	60	1;1;1;1	-1.66189	1.66189	d
F02_RD14-0003-44_45_46_47-1;1;4;1-M2U60-0.441GF-Q4.3_06.15sec	MT94826_Cauc	4	-1.96658	-0.314332	441	1;1;4;1	-1.65224	1.65224	U60
G02_RD14-0003-31_32-1;1-M1e-0.062GF-Q14.4_07.15sec	TT51035_Hisp	2	-4.53165	-2.88622	62	1;1	-1.64543	1.64543	e
D05_RD14-0003-46_47_48-1;1;1-M4I22-0.045GF-Q1.4_04.15sec	PT84179_AA	3	-1.63451	0.00372437	45	1;1;1	-1.63824	1.63824	I22
F07_RD14-0003-46_47_48-1;1;1-M3e-0.045GF-Q0.8_06.15sec	C43C_Cauc	3	-1.78781	-0.154541	45	1;1;1	-1.63327	1.63327	e
F04_RD14-0003-36_37_38_39-1;2;2;1-M2S30-0.09GF-Q2.9_06.15sec	WT52471_Cauc	4	-1.95861	-0.332558	90	1;2;2;1	-1.62605	1.62605	S30
C11_RD14-0003-48_49_50_29-1;4;4;4-M3d-0.195GF-Q0.9_03.15sec	C98C_Cauc	4	-2.25337	-0.631035	195	1;4;4;4	-1.62233	1.62233	d
A09_RD14-0003-49_50_29-1;4;1-M3e-0.186GF-Q1.6_01.15sec	UT57302_Cauc	3	-1.59346	0.0178202	186	1;4;1	-1.61128	1.61128	e
B09_RD14-0003-37_38_39_40-1;9;9;1-M2d-0.3GF-Q0.7_02.15sec	MT97166_Cauc	4	-1.92082	-0.322944	300	1;9;9;1	-1.59788	1.59788	d
F07_RD14-0003-46_47_48-1;1;1-M3e-0.045GF-Q0.8_06.15sec	GT37190_AA	3	-1.95468	-0.359126	45	1;1;1	-1.59555	1.59555	e
H02_RD14-0003-44_45_46_47-1;1;4;1-M3I22-0.105GF-Q1.9_08.15sec	GT38066_Cauc	4	-1.59176	-2.54201e-05	105	1;1;4;1	-1.59173	1.59173	I22
F05_RD14-0003-36_37_38_39-1;2;2;1-M2e-0.186GF-Q1.2_06.15sec	PT84252_AA	4	-3.37263	-1.78358	186	1;2;2;1	-1.58906	1.58906	e
A07_RD14-0003-46_47_48-1;1;1-M4d-0.045GF-Q0.6_01.15sec	ZT79617_AA	3	-1.97469	-0.386252	45	1;1;1	-1.58844	1.58844	d
G06_RD14-0003-33_34_35_36-1;4;4;1-M2d-0.15GF-Q0.9_07.15sec	C47A_Asian	4	-3.18709	-1.61514	150	1;4;4;1	-1.57195	1.57195	d
B05_RD14-0003-40_41_42_43-1;1;1;1-M3S10-0.06GF-Q1.5_02.15sec	OT05592_AA	4	-1.55596	6.09923e-05	60	1;1;1;1	-1.55602	1.55602	S10
F04_RD14-0003-36_37_38_39-1;2;2;1-M2S30-0.09GF-Q2.9_06.15sec	OT05562_AA	4	-1.8729	-0.333625	90	1;2;2;1	-1.53927	1.53927	S30
H02_RD14-0003-44_45_46_47-1;1;4;1-M3U60-0.105GF-Q28.7_08.15sec	C81H_Hisp	4	-1.60906	-0.0775017	105	1;1;4;1	-1.53156	1.53156	U60
E02_RD14-0003-36_37_38-1;2;1-M4d-0.06GF-Q1.2_05.15sec	MT97172_Cauc	3	-1.88273	-0.355257	60	1;2;1	-1.52747	1.52747	d
E01_RD14-0003-40_41_42_43-1;1;1;1-M4a-0.06GF-Q0.7_05.15sec	C23B_AA	4	-1.52724	0.000103063	60	1;1;1;1	-1.52735	1.52735	a
G01_RD14-0003-44_45-1;1-M4I22-0.03GF-Q2.0_07.15sec	MT94883_Cauc	2	-1.97469	-0.455661	30	1;1	-1.51903	1.51903	I22
G06_RD14-0003-33_34_35_36-1;4;4;1-M2d-0.15GF-Q0.9_07.15sec	PT84411_Hisp	4	-1.61439	-0.100009	150	1;4;4;1	-1.51438	1.51438	d
G02_RD14-0003-44_45_46_47-1;1;4;1-M3I22-0.217GF-Q1.9_07.15sec	C50B_AA	4	-1.50864	0.0048526	217	1;1;4;1	-1.51349	1.51349	I22
E04_RD14-0003-36_37_38_39-1;2;2;1-M2S30-0.186GF-Q2.9_05.15sec	TT51035_Hisp	4	-0.603801	0.880743	186	1;2;2;1	-1.48454	1.48454	S30
D02_RD14-0003-40_41_42_43-1;1;1;1-M2e-0.124GF-Q3.2_04.15sec	UA16899_Cauc	4	-1.45346	-0.000381701	124	1;1;1;1	-1.45308	1.45308	e
F04_RD14-0003-32_33_34_35-1;1;9;1-M2d-0.18GF-Q0.5_06.15sec	C22H_Hisp	4	-1.90658	-0.458921	180	1;1;9;1	-1.44766	1.44766	d
G06_RD14-0003-33_34_35_36-1;4;4;1-M2d-0.15GF-Q0.9_07.15sec	WT51556_AA	4	-0.632644	0.810897	150	1;4;4;1	-1.44354	1.44354	d
E01_RD14-0003-40_41_42_43-1;1;1;1-M4a-0.06GF-Q0.7_05.15sec	GT38093_Cauc	4	-1.44009	6.28451e-06	60	1;1;1;1	-1.4401	1.4401	a
F03_RD14-0003-49_50_29-1;4;1-M3S30-0.09GF-Q2.9_06.15sec	C45B_AA	3	-1.70774	-0.273967	90	1;4;1	-1.43378	1.43378	S30
B05_RD14-0003-36_37_38_39-1;2;2;1-M3d-0.09GF-Q1.2_02.15sec	UT58319_Cauc	4	-1.42713	0.000212265	90	1;2;2;1	-1.42734	1.42734	d
G05_RD14-0003-44_45_46_47-1;1;4;1-M2S30-0.105GF-Q3.3_07.15sec	C99B_AA	4	-1.42597	-0.00560404	105	1;1;4;1	-1.42036	1.42036	S30
D01_RD14-0003-44_45-1;1-M3S30-0.062GF-Q3.1_04.15sec	OT05587_AA	2	-4.21112	-2.80286	62	1;1	-1.40827	1.40827	S30
G02_RD14-0003-44_45_46_47-1;1;4;1-M2U60-0.217GF-Q4.3_07.15sec	PT83863_AA	4	-1.78516	-0.379791	217	1;1;4;1	-1.40536	1.40536	U60
D01_RD14-0003-40_41_42_43-1;1;1;1-M4I15-0.06GF-Q1.6_04.15sec	WT51373_Cauc	4	-1.39577	0.000224222	60	1;1;1;1	-1.396	1.396	I15
F05_RD14-0003-46_47_48-1;1;1-M3U60-0.045GF-Q4.0_06.15sec	MT97199_Cauc	3	-2.07263	-0.681951	45	1;1;1	-1.39068	1.39068	U60
F02_RD14-0003-44_45_46_47-1;1;4;1-M2U60-0.441GF-Q4.3_06.15sec	JT51493_AA	4	-1.04866	0.306606	441	1;1;4;1	-1.35527	1.35527	U60
E04_RD14-0003-36_37_38_39-1;2;2;1-M2S30-0.186GF-Q2.9_05.15sec	C78B_AA	4	-2.21042	-0.868107	186	1;2;2;1	-1.34231	1.34231	S30
A03_RD14-0003-46_47_48-1;1;1-M3S10-0.045GF-Q1.4_01.15sec	C01Ba_AA	3	-1.33819	0.000848162	45	1;1;1	-1.33904	1.33904	S10
D03_RD14-0003-44_45_46_47-1;1;4;1-M2U105-0.105GF-Q6.3_04.15sec	C94A_Asian	4	-1.11464	0.222724	105	1;1;4;1	-1.33736	1.33736	U105
G01_RD14-0003-40_41_42_43-1;1;1;1-M3U60-0.06GF-Q38.8_07.15sec	MT97200_Cauc	4	-1.33724	9.34825e-05	60	1;1;1;1	-1.33734	1.33734	U60
B04_RD14-0003-32_33_34_35-1;1;9;1-M2c-0.18GF-Q0.4_02.15sec	C54B_AA	4	-1.20204	0.113405	180	1;1;9;1	-1.31545	1.31545	c
G05_RD14-0003-44_45_46_47-1;1;4;1-M2S30-0.105GF-Q3.3_07.15sec	C56B_AA	4	-1.31695	-0.00873106	105	1;1;4;1	-1.30822	1.30822	S30
D03_RD14-0003-40_41-1;4-M3U105-0.075GF-Q14.8_04.15sec	MT97124_Cauc	2	-2.7986	-1.49172	75	1;4	-1.30688	1.30688	U105
F08_RD14-0003-37_38_39_40-1;9;9;1-M2c-0.3GF-Q0.6_06.15sec	C10A_Asian	4	-1.64589	-0.350192	300	1;9;9;1	-1.2957	1.2957	c
B02_RD14-0003-40_41_42_43-1;1;1;1-M4I35-0.06GF-QLAND_02.15sec	C89C_Cauc	4	-1.27246	0.0161299	60	1;1;1;1	-1.28859	1.28859	I35
A03_RD14-0003-44_45_46_47-1;1;4;1-M3a-0.105GF-Q0.8_01.15sec	C75H_Hisp	4	-1.28819	0.000170678	105	1;1;4;1	-1.28836	1.28836	a
H03_RD14-0003-44_45_46_47-1;1;4;1-M2e-0.441GF-Q1.5_08.15sec	C92H_Hisp	4	-1.73049	-0.463543	441	1;1;4;1	-1.26694	1.26694	e
H02_RD14-0003-44_45_46_47-1;1;4;1-M3U60-0.105GF-Q28.7_08.15sec	MT94869_Cauc	4	-1.34486	-0.0809905	105	1;1;4;1	-1.26387	1.26387	U60
B05_RD14-0003-41_42_43-1;9;1-M2e-0.165GF-Q1.7_02.15sec	WT51556_AA	3	-1.23657	0.0157642	165	1;9;1	-1.25234	1.25234	e
B04_RD14-0003-44_45_46_47-1;1;4;1-M2e-0.105GF-Q1.5_02.15sec	C37C_Cauc	4	-1.25026	7.08113e-05	105	1;1;4;1	-1.25033	1.25033	e
C07_RD14-0003-33_34_35_36-1;4;4;1-M2e-0.15GF-Q0.9_03.15sec	C92B_AA	4	-1.32975	-0.0831672	150	1;4;4;1	-1.24659	1.24659	e
A05_RD14-0003-36_37_38_39-1;2;2;1-M3d-0.186GF-Q1.2_01.15sec	TT50923_AA	4	-1.27819	-0.091785	186	1;2;2;1	-1.1864	1.1864	d
E01_RD14-0003-44_45-1;1-M4S30-0.03GF-Q3.2_05.15sec	C64H_Hisp	2	-1.78516	-0.628413	30	1;1	-1.15674	1.15674	S30
E02_RD14-0003-44_45_46_47-1;1;4;1-M3I15-0.105GF-Q1.1_05.15sec	ZT79328_AA	4	-1.15428	-9.42741e-05	105	1;1;4;1	-1.15419	1.15419	I15
F03_RD14-0003-49_50_29-1;4;1-M3S30-0.09GF-Q2.9_06.15sec	C06C_Cauc	3	-1.47366	-0.320032	90	1;4;1	-1.15363	1.15363	S30
F02_RD14-0003-44_45_46_47-1;1;4;1-M2U60-0.441GF-Q4.3_06.15sec	C29H_Hisp	4	-1.46852	-0.316369	441	1;1;4;1	-1.15215	1.15215	U60
G11_RD14-0003-39_40-1;2-M4e-0.045GF-Q2.4_07.15sec	PT84236_AA	2	-1.14752	-0.000982734	45	1;2	-1.14654	1.14654	e
A04_RD14-0003-44_45_46_47-1;1;4;1-M2e-0.217GF-Q1.5_01.15sec	C95B_AA	4	-1.61798	-0.489637	217	1;1;4;1	-1.12835	1.12835	e
F08_RD14-0003-37_38_39_40-1;9;9;1-M2c-0.3GF-Q0.6_06.15sec	MT97158_Cauc	4	-1.03152	0.0924683	300	1;9;9;1	-1.12399	1.12399	c
G10_RD14-0003-48_49_50_29-1;4;4;4-M3c-0.195GF-Q1.1_07.15sec	GT37184_AA	4	-1.8729	-0.761958	195	1;4;4;4	-1.11094	1.11094	c
F08_RD14-0003-49_50_29-1;4;1-M4d-0.09GF-Q1.3_06.15sec	C29C_Cauc	3	-1.09528	0.000233939	90	1;4;1	-1.09552	1.09552	d
B04_RD14-0003-32_33_34_35-1;1;9;1-M2c-0.18GF-Q0.4_02.15sec	JT51336_AA	4	-0.187755	0.882995	180	1;1;9;1	-1.07075	1.07075	c
B05_RD14-0003-40_41_42_43-1;1;1;1-M3S10-0.06GF-Q1.5_02.15sec	ZA08589_Hisp	4	-1.0511	0.000260663	60	1;1;1;1	-1.05136	1.05136	S10
A02_RD14-0003-40_41_42_43-1;1;1;1-M4d-0.06GF-Q1.7_01.15sec	C68A_Asian	4	-1.03953	0.00047727	60	1;1;1;1	-1.04001	1.04001	d
F05_RD14-0003-46_47_48-1;1;1-M3U60-0.045GF-Q4.0_06.15sec	C52C_Cauc	3	-1.78516	-0.756319	45	1;1;1	-1.02884	1.02884	U60
A03_RD14-0003-36_37_38-1;2;1-M3e-0.06GF-Q1.6_01.15sec	C54A_Asian	3	-1.01818	-1.60117e-05	60	1;2;1	-1.01817	1.01817	e
E02_RD14-0003-31_32-1;1-M2d-0.03GF-Q6.0_05.15sec	OT05599_AA	2	-3.42251	-2.40776	30	1;1	-1.01475	1.01475	d
A07_RD14-0003-46_47_48-1;1;1-M4d-0.045GF-Q0.6_01.15sec	C13H_Hisp	3	-0.659556	0.347848	45	1;1;1	-1.0074	1.0074	d
B08_RD14-0003-37_38_39_40-1;9;9;1-M2a-0.3GF-Q0.4_02.15sec	C18C_Cauc	4	-1.90309	-0.898423	300	1;9;9;1	-1.00467	1.00467	a
A02_RD14-0003-40_41_42_43-1;1;1;1-M4d-0.06GF-Q1.7_01.15sec	ZT80070_Hisp	4	-0.536107	0.463911	60	1;1;1;1	-1.00002	1.00002	d
F09_RD14-0003-37_38_39_40-1;9;9;1-M2e-0.5GF-Q0.8_06.15sec	Y4_Cauc	4	-1.2426	-0.25164	500	1;9;9;1	-0.990964	0.990964	e
E04_RD14-0003-48_49_50_29-1;4;4;4-M2U105-0.195GF-Q12.1_05.15sec	ZT79899_Hisp	4	-1.25026	-0.259707	195	1;4;4;4	-0.990556	0.990556	U105
F05_RD14-0003-36_37_38_39-1;2;2;1-M2e-0.186GF-Q1.2_06.15sec	PT83881_AA	4	-2.26201	-1.27986	186	1;2;2;1	-0.982151	0.982151	e
B04_RD14-0003-44_45_46_47-1;1;4;1-M2e-0.105GF-Q1.5_02.15sec	MT94833_Cauc	4	-0.978811	0.000374148	105	1;1;4;1	-0.979185	0.979185	e
B04_RD14-0003-30_31_32-1;4;4-M2S30-0.135GF-Q3.8_02.15sec	C24C_Cauc	3	-2.30892	-1.3669	135	1;4;4	-0.942019	0.942019	S30
A03_RD14-0003-44_45_46_47-1;1;4;1-M2U105-0.441GF-Q6.3_01.15sec	C39A_Asian	4	-1.21396	-0.276964	441	1;1;4;1	-0.936995	0.936995	U105
E02_RD14-0003-44_45_46_47-1;1;4;1-M3I15-0.105GF-Q1.1_05.15sec	C15C_Cauc	4	-0.853872	0.0823835	105	1;1;4;1	-0.936255	0.936255	I15
H01_RD14-0003-40_41_42_43-1;1;1;1-M4d-0.124GF-Q1.7_08.15sec	C70B_AA	4	-0.9914	-0.0577355	124	1;1;1;1	-0.933664	0.933664	d
D09_RD14-0003-37_38_39_40-1;9;9;1-M2e-0.62GF-Q0.8_04.15sec	C84H_Hisp	4	-2.07727	-1.14585	620	1;9;9;1	-0.931422	0.931422	e
B07_RD14-0003-49_50_29-1;4;1-M3U105-0.09GF-Q6.1_02.15sec	WT51510_AA	3	-1.32606	-0.395404	90	1;4;1	-0.930654	0.930654	U105
F04_RD14-0003-36_37_38_39-1;2;2;1-M3a-0.09GF-Q0.7_06.15sec	C78H_Hisp	4	-2.57349	-1.65239	90	1;2;2;1	-0.9211	0.9211	a
D03_RD14-0003-44_45_46_47-1;1;4;1-M2U105-0.105GF-Q6.3_04.15sec	C47A_Asian	4	-0.920819	0.000125477	105	1;1;4;1	-0.920944	0.920944	U105
G01_RD14-0003-44_45-1;1-M4I22-0.03GF-Q2.0_07.15sec	GT37170_AA	2	-1.67366	-0.779249	30	1;1	-0.894416	0.894416	I22
F05_RD14-0003-36_37_38_39-1;2;2;1-M2e-0.186GF-Q1.2_06.15sec	C27A_Asian	4	-2.45967	-1.56869	186	1;2;2;1	-0.890979	0.890979	e
B07_RD14-0003-49_50_29-1;4;1-M3U105-0.09GF-Q6.1_02.15sec	WA29572_Cauc	3	-1.27984	-0.392441	90	1;4;1	-0.887399	0.887399	U105
D03_RD14-0003-40_41-1;4-M3U105-0.075GF-Q14.8_04.15sec	C20B_AA	2	-5.86012	-4.97798	75	1;4	-0.882136	0.882136	U105
B07_RD14-0003-49_50_29-1;4;1-M3U105-0.09GF-Q6.1_02.15sec	GT36884_Cauc	3	-1.09691	-0.226678	90	1;4;1	-0.870232	0.870232	U105
F09_RD14-0003-37_38_39_40-1;9;9;1-M2e-0.5GF-Q0.8_06.15sec	C60B_AA	4	-0.194499	0.670782	500	1;9;9;1	-0.865281	0.865281	e
F08_RD14-0003-49_50_29-1;4;1-M4d-0.09GF-Q1.3_06.15sec	JT51471_AA	3	-0.590067	0.247376	90	1;4;1	-0.837443	0.837443	d
E07_RD14-0003-44_45_46-1;2;2-M2e-0.155GF-Q2.9_05.15sec	C09C_Cauc	3	-0.721246	0.094673	155	1;2;2	-0.815919	0.815919	e
E02_RD14-0003-36_37_38-1;2;1-M4d-0.06GF-Q1.2_05.15sec	MT97167_Cauc	3	-1.1512	-0.341964	60	1;2;1	-0.809231	0.809231	d
B05_RD14-0003-40_41_42_43-1;1;1;1-M3S10-0.06GF-Q1.5_02.15sec	ZT80163_Hisp	4	-0.801343	0.000173028	60	1;1;1;1	-0.801516	0.801516	S10
G05_RD14-0003-36_37_38_39-1;2;2;1-M3e-0.09GF-Q1.2_07.15sec	C32C_Cauc	4	-0.793174	0.00797168	90	1;2;2;1	-0.801146	0.801146	e
B09_RD14-0003-49_50_29-1;4;1-M3e-0.09GF-Q1.6_02.15sec	C40H_Hisp	3	-1.17263	-0.377953	90	1;4;1	-0.794678	0.794678	e
G05_RD14-0003-36_37_38_39-1;2;2;1-M3e-0.09GF-Q1.2_07.15sec	PT84248_AA	4	-0.798603	-0.00862172	90	1;2;2;1	-0.789981	0.789981	e
G05_RD14-0003-44_45_46_47-1;1;4;1-M2S30-0.105GF-Q3.3_07.15sec	PT83978_AA	4	-0.659556	0.130402	105	1;1;4;1	-0.789958	0.789958	S30
B05_RD14-0003-36_37_38_39-1;2;2;1-M3d-0.09GF-Q1.2_02.15sec	MT97200_Cauc	4	-0.756962	0.0225869	90	1;2;2;1	-0.779549	0.779549	d
F08_RD14-0003-49_50_29-1;4;1-M4d-0.09GF-Q1.3_06.15sec	JT51464_AA	3	-0.767004	-0.00020249	90	1;4;1	-0.766801	0.766801	d
E02_RD14-0003-44_45_46_47-1;1;4;1-M4U15-0.105GF-Q4.4_05.15sec	PT83538_Cauc	4	-0.661544	0.104105	105	1;1;4;1	-0.765648	0.765648	U15
F01_RD14-0003-40_41_42_43-1;1;1;1-M2U60-0.124GF-Q4.7_06.15sec	PT84232_AA	4	0.962843	1.70915	124	1;1;1;1	-0.746304	0.746304	U60
C07_RD14-0003-33_34_35_36-1;4;4;1-M2e-0.15GF-Q0.9_03.15sec	C67C_Cauc	4	-0.869666	-0.128372	150	1;4;4;1	-0.741294	0.741294	e
F03_RD14-0003-44_45_46_47-1;1;4;1-M3d-0.105GF-Q0.8_06.15sec	C96B_AA	4	0.808211	1.54253	105	1;1;4;1	-0.73432	0.73432	d
H02_RD14-0003-31_32-1;1-M1e-0.03GF-Q14.4_08.15sec	C30B_AA	2	-2.88273	-2.15787	30	1;1	-0.724864	0.724864	e
H02_RD14-0003-44_45_46_47-1;1;4;1-M3U60-0.105GF-Q28.7_08.15sec	C43A_Asian	4	-0.742321	-0.0276507	105	1;1;4;1	-0.714671	0.714671	U60
E02_RD14-0003-40_41_42_43-1;1;1;1-M4e-0.06GF-Q5.6_05.15sec	C96H_Hisp	4	-0.701147	0.00195447	60	1;1;1;1	-0.703101	0.703101	e
H02_RD14-0003-44_45_46_47-1;1;4;1-M3U60-0.105GF-Q28.7_08.15sec	GT37402_Hisp	4	-0.661544	0.0414967	105	1;1;4;1	-0.70304	0.70304	U60
D02_RD14-0003-40_41_42_43-1;1;1;1-M2e-0.124GF-Q3.2_04.15sec	C30A_Asian	4	-0.679854	-8.29555e-05	124	1;1;1;1	-0.679771	0.679771	e
G01_RD14-0003-40_41_42_43-1;1;1;1-M3U60-0.06GF-Q38.8_07.15sec	ZT79899_Hisp	4	-0.657577	0.000152703	60	1;1;1;1	-0.65773	0.65773	U60
D01_RD14-0003-40_41_42_43-1;1;1;1-M4U15-0.06GF-Q3.7_04.15sec	TT51694_Cauc	4	-0.779892	-0.129165	60	1;1;1;1	-0.650727	0.650727	U15
A03_RD14-0003-46_47_48-1;1;1-M3S10-0.045GF-Q1.4_01.15sec	ZT80131_Hisp	3	-0.638272	0.00622649	45	1;1;1	-0.644499	0.644499	S10
G05_RD14-0003-36_37_38_39-1;2;2;1-M3e-0.09GF-Q1.2_07.15sec	MT94858_Cauc	4	-0.533132	0.108263	90	1;2;2;1	-0.641395	0.641395	e
G05_RD14-0003-44_45_46_47-1;1;4;1-M2S30-0.105GF-Q3.3_07.15sec	C81H_Hisp	4	-0.636388	-0.00097366	105	1;1;4;1	-0.635414	0.635414	S30
E02_RD14-0003-40_41_42_43-1;1;1;1-M4e-0.06GF-Q5.6_05.15sec	MT94875_Cauc	4	-0.638272	-0.00513114	60	1;1;1;1	-0.633141	0.633141	e
H01_RD14-0003-40_41_42_43-1;1;1;1-M4d-0.124GF-Q1.7_08.15sec	JT51499_AA	4	-0.015923	0.612582	124	1;1;1;1	-0.628505	0.628505	d
A03_RD14-0003-50_29_30_31-1;1;2;1-M3e-0.075GF-Q1.1_01.15sec	TT51483_Hisp	4	-2.72584	-2.09889	75	1;1;2;1	-0.626956	0.626956	e
B05_RD14-0003-36_37_38_39-1;2;2;1-M3d-0.09GF-Q1.2_02.15sec	C98H_Hisp	4	-0.610834	-0.000182372	90	1;2;2;1	-0.610652	0.610652	d
H02_RD14-0003-44_45_46_47-1;1;4;1-M3I22-0.105GF-Q1.9_08.15sec	PT84244_AA	4	-0.595166	0.0140025	105	1;1;4;1	-0.609169	0.609169	I22
D01_RD14-0003-40_41_42_43-1;1;1;1-M4U15-0.06GF-Q3.7_04.15sec	PT83862_AA	4	0.32838	0.897802	60	1;1;1;1	-0.569422	0.569422	U15
B04_RD14-0003-44_45_46_47-1;1;4;1-M2e-0.105GF-Q1.5_02.15sec	C76B_AA	4	-0.518557	0.0395622	105	1;1;4;1	-0.55812	0.55812	e
F08_RD14-0003-37_38_39_40-1;9;9;1-M2c-0.3GF-Q0.6_06.15sec	C10H_Hisp	4	-0.649752	-0.0929494	300	1;9;9;1	-0.556803	0.556803	c
E01_RD14-0003-44_45-1;1-M4S30-0.03GF-Q3.2_05.15sec	MT95855_Hisp	2	-1.09909	-0.547593	30	1;1	-0.551494	0.551494	S30
B02_RD14-0003-40_41_42_43-1;1;1;1-M4I35-0.06GF-QLAND_02.15sec	C73C_Cauc	4	0.292256	0.835599	60	1;1;1;1	-0.543343	0.543343	I35
G07_RD14-0003-37_38_39_40-1;9;9;1-M2a-0.75GF-Q0.4_07.15sec	MT94882_Cauc	4	-8.56703	-8.03863	750	1;9;9;1	-0.528404	0.528404	a
E02_RD14-0003-40_41_42_43-1;1;1;1-M4e-0.06GF-Q5.6_05.15sec	UT58334_Cauc	4	-0.525784	0.00199722	60	1;1;1;1	-0.527781	0.527781	e
E02_RD14-0003-31_32-1;1-M2d-0.03GF-Q6.0_05.15sec	C82H_Hisp	2	-1.75449	-1.25226	30	1;1	-0.50223	0.50223	d
F04_RD14-0003-36_37_38_39-1;2;2;1-M2S30-0.09GF-Q2.9_06.15sec	JT51478_AA	4	0.0827854	0.567229	90	1;2;2;1	-0.484444	0.484444	S30
G09_RD14-0003-47_48_49-1;9;9-M2e-0.285GF-Q1.5_07.15sec	C100C_Cauc	3	-3.1707	-2.68704	285	1;9;9	-0.483659	0.483659	e
E05_RD14-0003-44_45_46_47-1;1;4;1-M1S30-0.441GF-Q2.9_05.15sec	C67C_Cauc	4	-1.1891	-0.710771	441	1;1;4;1	-0.478325	0.478325	S30
E01_RD14-0003-40_41_42_43-1;1;1;1-M4a-0.06GF-Q0.7_05.15sec	Y18_AA	4	-0.47237	0.000130351	60	1;1;1;1	-0.4725	0.4725	a
D09_RD14-0003-37_38_39_40-1;9;9;1-M2e-0.62GF-Q0.8_04.15sec	C84B_AA	4	-2.41454	-1.95552	620	1;9;9;1	-0.459018	0.459018	e
A02_RD14-0003-36_37_38-1;2;1-M4c-0.06GF-Q1.1_01.15sec	JT51487_AA	3	0.808886	1.26541	60	1;2;1	-0.456525	0.456525	c
A03_RD14-0003-50_29_30_31-1;1;2;1-M3e-0.075GF-Q1.1_01.15sec	MT97172_Cauc	4	-0.350665	0.0869318	75	1;1;2;1	-0.437597	0.437597	e
E04_RD14-0003-36_37_38_39-1;2;2;1-M2S30-0.186GF-Q2.9_05.15sec	PT84232_AA	4	-0.866461	-0.437096	186	1;2;2;1	-0.429365	0.429365	S30
D04_RD14-0003-36_37_38_39-1;2;2;1-M1S30-0.378GF-Q2.6_04.15sec	C95B_AA	4	-0.493495	-0.072999	378	1;2;2;1	-0.420496	0.420496	S30
B05_RD14-0003-41_42_43-1;9;1-M2e-0.165GF-Q1.7_02.15sec	JT51472_AA	3	-0.414539	3.73314e-05	165	1;9;1	-0.414577	0.414577	e
E02_RD14-0003-40_41_42_43-1;1;1;1-M4e-0.06GF-Q5.6_05.15sec	C17C_Cauc	4	-0.401209	0.00149855	60	1;1;1;1	-0.402708	0.402708	e
B02_RD14-0003-40_41_42_43-1;1;1;1-M3U105-0.06GF-QLAND_02.15sec	C77A_Asian	4	-0.191114	0.19719	60	1;1;1;1	-0.388304	0.388304	U105
D01_RD14-0003-40_41_42_43-1;1;1;1-M4U15-0.06GF-Q3.7_04.15sec	C59C_Cauc	4	-0.473661	-0.0983519	60	1;1;1;1	-0.375309	0.375309	U15
D09_RD14-0003-37_38_39_40-1;9;9;1-M2e-0.62GF-Q0.8_04.15sec	WT51546_AA	4	-2.63827	-2.28314	620	1;9;9;1	-0.355136	0.355136	e
G05_RD14-0003-36_37_38_39-1;2;2;1-M3e-0.09GF-Q1.2_07.15sec	ZT80786_Hisp	4	-0.316953	0.0371746	90	1;2;2;1	-0.354128	0.354128	e
G02_RD14-0003-44_45_46_47-1;1;4;1-M2U60-0.217GF-Q4.3_07.15sec	Y18_AA	4	0.866878	1.22031	217	1;1;4;1	-0.353428	0.353428	U60
D01_RD14-0003-40_41_42_43-1;1;1;1-M4U15-0.06GF-Q3.7_04.15sec	ZT81377_Cauc	4	-0.440093	-0.105078	60	1;1;1;1	-0.335015	0.335015	U15
H01_RD14-0003-40_41_42_43-1;1;1;1-M4d-0.124GF-Q1.7_08.15sec	C14B_AA	4	1.04532	1.36772	124	1;1;1;1	-0.322395	0.322395	d
B02_RD14-0003-40_41_42_43-1;1;1;1-M3U105-0.06GF-QLAND_02.15sec	PT83978_AA	4	0.436163	0.755747	60	1;1;1;1	-0.319585	0.319585	U105
B05_RD14-0003-40_41_42_43-1;1;1;1-M3S10-0.06GF-Q1.5_02.15sec	UT57303_Cauc	4	-0.314258	-0.000232778	60	1;1;1;1	-0.314025	0.314025	S10
F03_RD14-0003-44_45_46_47-1;1;4;1-M3d-0.105GF-Q0.8_06.15sec	C02A_Asian	4	0.597695	0.899245	105	1;1;4;1	-0.30155	0.30155	d
B02_RD14-0003-40_41_42_43-1;1;1;1-M3U105-0.06GF-QLAND_02.15sec	WT52480_Cauc	4	-0.347754	-0.0471853	60	1;1;1;1	-0.300568	0.300568	U105
F05_RD14-0003-44_45_46_47-1;1;4;1-M2S30-0.217GF-Q3.3_06.15sec	OT07767_Cauc	4	-0.251812	0.0230357	217	1;1;4;1	-0.274848	0.274848	S30
A08_RD14-0003-37_38_39_40-1;9;9;1-M2a-0.5GF-Q0.4_01.15sec	Y37_AA	4	-1.64975	-1.43137	500	1;9;9;1	-0.218383	0.218383	a
F04_RD14-0003-36_37_38_39-1;2;2;1-M2S30-0.09GF-Q2.9_06.15sec	C76H_Hisp	4	-0.09691	0.106362	90	1;2;2;1	-0.203272	0.203272	S30
B02_RD14-0003-40_41_42_43-1;1;1;1-M3U105-0.06GF-QLAND_02.15sec	GT37184_AA	4	0.164353	0.26814	60	1;1;1;1	-0.103788	0.103788	U105
G11_RD14-0003-39_40-1;2-M4e-0.045GF-Q2.4_07.15sec	ZT80737_Hisp	2	0.123852	0.00118496	45	1;2	0.122667	-0.122667	e
E04_RD14-0003-48_49_50_29-1;4;4;4-M2U105-0.195GF-Q12.1_05.15sec	ZT80932_Hisp	4	0.93902	0.798782	195	1;4;4;4	0.140238	-0.140238	U105
D05_RD14-0003-46_47_48-1;1;1-M4I22-0.045GF-Q1.4_04.15sec	MT94858_Cauc	3	0.586587	0.243702	45	1;1;1	0.342885	-0.342885	I22
F05_RD14-0003-44_45_46_47-1;1;4;1-M2S30-0.217GF-Q3.3_06.15sec	MT97139_Cauc	4	0.292256	-0.169901	217	1;1;4;1	0.462157	-0.462157	S30
D02_RD14-0003-40_41_42_43-1;1;1;1-M2e-0.124GF-Q3.2_04.15sec	C30B_AA	4	2.76864	2.22324	124	1;1;1;1	0.545395	-0.545395	e
B08_RD14-0003-37_38_39_40-1;9;9;1-M2a-0.3GF-Q0.4_02.15sec	GT37900_Hisp	4	0.62941	-0.0813942	300	1;9;9;1	0.710804	-0.710804	a
D09_RD14-0003-37_38_39_40-1;9;9;1-M2e-0.62GF-Q0.8_04.15sec	ZT79311_AA	4	-1.07988	-1.92923	620	1;9;9;1	0.849353	-0.849353	e
A04_RD14-0003-41_42_43-1;9;1-M2c-0.341GF-Q1.1_01.15sec	C48H_Hisp	3	-0.730487	-1.83855	341	1;9;1	1.10807	-1.10807	c
G07_RD14-0003-37_38_39_40-1;9;9;1-M2a-0.75GF-Q0.4_07.15sec	C69H_Hisp	4	-5.57025	-9.19078	750	1;9;9;1	3.62054	-3.62054	a
G07_RD14-0003-37_38_39_40-1;9;9;1-M2a-0.75GF-Q0.4_07.15sec	C53H_Hisp	4	-4.20971	-7.88871	750	1;9;9;1	3.679	-3.679	a
G07_RD14-0003-37_38_39_40-1;9;9;1-M2a-0.75GF-Q0.4_07.15sec	C72H_Hisp	4	-1.95078	-9.16172	750	1;9;9;1	7.21094	-7.21094	a
